# Supplementary material for: Identification of SARS-CoV-2 Variants Using Viral Sequencing for the Centers for Disease Control and Prevention Genomic U.S. Surveillance Program.
Source: Research Square preprint supplement (doi:10.21203/rs.3.rs-1134436/v1), 2022-02-25
Supplement: Supplementary file 1 [file 1adf7df2a0d68377ed7f7c9d.xlsx]

## Sheet: Supplementary Table
Sample ID	DETECTED SARS COV2	LINEAGE	N GENE	MATCODE	CLADE	FRACTION CONSENSUS SEQUENCE MASKED	AVG COV	GEO LOC STATE	HOST AGE	HOST SEX	HOST RACE	HOST ETHNICITY	Sequencer	Sequenced	Vaccination Status
Sample 1	-	Sample Not Detected	25.8071	OPC				MD		NA	NO INFORMATION	NO INFORMATION	NextSeq	2021-04-21	unknown
Sample 2	+	B.1.1.7	6.83692	OPC	20I/501Y.V1	0.00274394	1210.84	KY	94	M	WHITE	Unknown	NextSeq	2021-05-21	unknown
Sample 3	+	B.1.1.7	14.3268	OPC	20I/501Y.V1	0.074488	587.59	KY	65	F	UNKNOWN	DECLINE TO IDENTIFY	NextSeq	2021-05-21	unknown
Sample 4	+	B.1.1.7	10.0657	OPC	20I/501Y.V1	0.305186	688.43	KY	87	M	WHITE	Unknown	NextSeq	2021-05-21	unknown
Sample 5	+	Could Not Generate	28.8032	OPC	20A	0.800935	212.17	TN		NA	NO INFORMATION	NO INFORMATION	NextSeq	2021-04-21	unknown
Sample 6	+	Could Not Generate	22.9329	OPC	20I/501Y.V1	0.655385	280.84	NA		NA	NO INFORMATION	NO INFORMATION	NextSeq	2021-05-21	unknown
Sample 7	+	Could Not Generate	23.8595	OPC	20G	0.511552	403.16	FL		NA	NO INFORMATION	NO INFORMATION	NextSeq	2021-04-21	unknown
Sample 8	+	B.1.2	19.9846	OPC	20G	0.0139785	983.55	FL		NA	NO INFORMATION	NO INFORMATION	NextSeq	2021-04-21	unknown
Sample 9	+	B.1.2	18.9155	OPC	20G	0.0486239	935.9	FL		NA	NO INFORMATION	NO INFORMATION	NextSeq	2021-04-21	unknown
Sample 10	+	B.1.1.7	16.1909	OPC	20I/501Y.V1	0.0654668	753.81	KY	44	F	WHITE	NON HISPANIC OR LATINO	NextSeq	2021-05-21	unknown
Sample 11	+	B.1.1.7	12.9878	OPC	20I/501Y.V1	0.02155	677.03	KY	72	F	WHITE	WHITE	NextSeq	2021-05-21	unknown
Sample 12	+	B.1.526	19.3036	OPC	20C	0.0135483	892.92	FL	71	F	WHITE	NON HISPANIC OR LATINO	NextSeq	2021-04-21	unknown
Sample 13	+	B.1.1.7	20.5514	OPC	20I/501Y.V1	0.0354705	738.25	VA		NA	NO INFORMATION	NO INFORMATION	NextSeq	2021-04-21	unknown
Sample 14	+	B.1.526.1	12.9092	OPC	20C	0.00163934	1314.71	GA		NA	NO INFORMATION	NO INFORMATION	NextSeq	2021-04-21	unknown
Sample 15	+	Could Not Generate	26.6315	OPC	20G	0.684714	357.57	GA		NA	NO INFORMATION	NO INFORMATION	NextSeq	2021-04-21	unknown
Sample 16	+	B.1.429	24.6982	OPC	20C	0.490185	349.78	FL		NA	NO INFORMATION	NO INFORMATION	NextSeq	2021-04-21	unknown
Sample 17	+	Could Not Generate	14.8248	OPC	20I/501Y.V1	0.762451	311.8	KY	21	F	WHITE	NON HISPANIC OR LATINO	NextSeq	2021-05-21	unknown
Sample 18	+	B.1.1.7	17.4672	OPC	20I/501Y.V1	0.00458439	1205.38	FL		NA	NO INFORMATION	NO INFORMATION	NextSeq	2021-04-21	unknown
Sample 19	+	B.1.1.7	15.3734	OPC	20I/501Y.V1	0.0215165	991.22	NA		NA	NO INFORMATION	NO INFORMATION	NextSeq	2021-05-21	unknown
Sample 20	+	Could Not Generate	23.8144	OPC	20I/501Y.V1	0.714721	364.44	FL	40	F	BLACK	NON HISPANIC OR LATINO	NextSeq	2021-05-21	unknown
Sample 21	+	Could Not Generate	24.9901	OPC	20I/501Y.V1	0.66738	424.46	FL		NA	NO INFORMATION	NO INFORMATION	NextSeq	2021-04-21	unknown
Sample 22	-	Sample Not Detected	23.3988	OPC				KY	84	F	WHITE	WHITE	NextSeq	2021-05-21	unknown
Sample 23	+	Could Not Generate	22.0996	OPC	20I/501Y.V1	0.781995	186.7	KY	82	F	WHITE	WHITE	NextSeq	2021-05-21	unknown
Sample 24	+	B.1.1.7	27.3796	OPC	20I/501Y.V1	0.349903	614.45	KY	56	M	WHITE	NON HISPANIC OR LATINO	NextSeq	2021-04-21	unknown
Sample 25	+	Could Not Generate	25.1076	OPC	20I/501Y.V1	0.856111	193.51	TN	35	F	WHITE	NON HISPANIC OR LATINO	NextSeq	2021-05-21	unknown
Sample 26	+	Could Not Generate	25.9778	OPC	20I/501Y.V1	0.796815	240.32	NA		NA	NO INFORMATION	NO INFORMATION	NextSeq	2021-05-21	unknown
Sample 27	+	Could Not Generate	24.4696	OPC		0.792343	203.3	AL	41	F	BLACK	DECLINE TO IDENTIFY	NextSeq	2021-05-21	unknown
Sample 28	+	Could Not Generate	23.2966	OPC	20A	0.82652	187.3	KY	81	M	WHITE	DECLINE TO IDENTIFY	NextSeq	2021-05-21	unknown
Sample 29	+	B.1.2	18.0907	OPC	20G	0.0275223	1050.03	TN		NA	NO INFORMATION	NO INFORMATION	NextSeq	2021-04-21	unknown
Sample 30	+	B.1.427	20.3154	OPC	20C	0.135579	771.02	KY		NA	NO INFORMATION	NO INFORMATION	NextSeq	2021-04-21	unknown
Sample 31	+	B.1.1.7	17.6619	OPC	20I/501Y.V1	0.00200776	1394.25	FL		NA	NO INFORMATION	NO INFORMATION	NextSeq	2021-04-21	unknown
Sample 32	+	B.1.1.348	21.3266	OPC	20B	0.0500953	758.91	FL	39	M	HISPANIC OR LATINO	HISPANIC OR LATINO	NextSeq	2021-04-21	unknown
Sample 33	+	Could Not Generate	26.3125	OPC	19A	0.833617	227.35	GA		NA	NO INFORMATION	NO INFORMATION	NextSeq	2021-04-21	unknown
Sample 34	+	P.2	20.2151	OPC	20B	0.0134819	1103.23	FL		NA	NO INFORMATION	NO INFORMATION	NextSeq	2021-04-21	unknown
Sample 35	+	Could Not Generate	24.2114	OPC	20G	0.583319	387.38	TN		NA	NO INFORMATION	NO INFORMATION	NextSeq	2021-04-21	unknown
Sample 36	+	B.1.2	13.0832	OPC	20G	0.00866134	1424.57	TN		NA	NO INFORMATION	NO INFORMATION	NextSeq	2021-04-21	unknown
Sample 37	+	Could Not Generate	26.735	OPC	20G	0.598201	479.25	TN		NA	NO INFORMATION	NO INFORMATION	NextSeq	2021-04-21	unknown
Sample 38	+	Could Not Generate	24.0243	OPC		0.954283	132.73	TN	94	M	WHITE	WHITE	NextSeq	2021-04-21	unknown
Sample 39	+	Could Not Generate	25.5433	OPC	20I/501Y.V1	0.750535	441.06	AL	45	F	WHITE	NON HISPANIC OR LATINO	NextSeq	2021-05-21	unknown
Sample 40	+	B.1.1.7	28.7137	OPC	20I/501Y.V1	0.279882	637.17	FL	59	F	HISPANIC OR LATINO	HISPANIC OR LATINO	NextSeq	2021-04-21	unknown
Sample 41	+	Could Not Generate	25.7512	OPC	20A	0.923804	114.12	TN	87	F	WHITE	WHITE	NextSeq	2021-05-21	unknown
Sample 42	+	B.1.1.7	28.1685	OPC	20A	0.228775	534.29	FL	80	F	BLACK	BLACK NOT OF HISPANIC ORIGIN	NextSeq	2021-04-21	unknown
Sample 43	-	Sample Not Detected	28.002	OPC				MD	95	F	White	not hispanic	NextSeq	2021-08-21	unknown
Sample 44	+	Could Not Generate	23.8522	OPC	20B	0.72674	273.66	MD	60	M	White	not hispanic	NextSeq	2021-08-21	unknown
Sample 45	+	Could Not Generate	24.0882	OPC	20I/501Y.V1	0.753186	437.19	MD	37	F	BLACK	NON HISPANIC OR LATINO	NextSeq	2021-05-21	unknown
Sample 46	+	B.1.1.7	23.6391	OPC	20I/501Y.V1	0.102362	673.02	KY	47	F	WHITE	NON HISPANIC OR LATINO	NextSeq	2021-05-21	unknown
Sample 47	+	B.1.1.7	19.2885	OPC	20I/501Y.V1	0.031455	766.42	KY	34	M	WHITE	WHITE	NextSeq	2021-05-21	unknown
Sample 48	-	Sample Not Detected	29.3087	OPC				FL		NA	NO INFORMATION	NO INFORMATION	NextSeq	2021-04-21	unknown
Sample 49	+	B.1	20.3486	OPC	20C	0.244992	815.34	TN	46	F	BLACK	NON HISPANIC OR LATINO	NextSeq	2021-05-21	unknown
Sample 50	+	Could Not Generate	21.3637	OPC	20I/501Y.V1	0.55779	406.88	FL	33	F	BLACK	NON HISPANIC OR LATINO	NextSeq	2021-05-21	unknown
Sample 51	+	Could Not Generate	26.547	OPC	20I/501Y.V1	0.662832	253.98	KY	63	M	BLACK	BLACK NOT OF HISPANIC ORIGIN	NextSeq	2021-05-21	unknown
Sample 52	+	B.1.1.7	27.59	OPC	20I/501Y.V1	0.25688	523.59	FL	46	F	BLACK	NON HISPANIC OR LATINO	NextSeq	2021-04-21	unknown
Sample 53	+	Could Not Generate	22.8575	OPC	20I/501Y.V1	0.663641	444.44	FL	94	F	WHITE	Unknown	NextSeq	2021-05-21	unknown
Sample 54	+	B.1.1	11.5071	OPC	20C	0.0989864	743.73	TN	43	F	WHITE	NON HISPANIC OR LATINO	NextSeq	2021-05-21	unknown
Sample 55	+	B.1.1.7	7.66784	OPC	20I/501Y.V1	0.00267836	1328.01	KY	75	F	WHITE	WHITE	NextSeq	2021-05-21	unknown
Sample 56	+	B.1.1.7	21.7401	OPC	20I/501Y.V1	0.501423	425.76	NC	71	F	BLACK	DECLINE TO IDENTIFY	NextSeq	2021-05-21	unknown
Sample 57	+	Could Not Generate	29.8525	OPC	20I/501Y.V1	0.683311	300.03	MD	77	F	WHITE	WHITE	NextSeq	2021-05-21	unknown
Sample 58	+	A	23.623	OPC	21A (Delta)	0.284018	457.37	IN	24	F	White	unknown	NextSeq	2021-08-21	unknown
Sample 59	+	B.1.1.7	12.8227	OPC	20I/501Y.V1	0.0297149	1006.79	NA		NA	NO INFORMATION	NO INFORMATION	NextSeq	2021-05-21	unknown
Sample 60	+	Could Not Generate	26.8539	OPC	20I/501Y.V1	0.683939	330.77	KY	42	M	WHITE	NON HISPANIC OR LATINO	NextSeq	2021-05-21	unknown
Sample 61	+	B.1.1.7	25.8016	OPC	20I/501Y.V1	0.236496	595.89	TN		NA	NO INFORMATION	NO INFORMATION	NextSeq	2021-04-21	unknown
Sample 62	+	Could Not Generate	29.8619	OPC	19A	0.867383	224.74	GA		NA	NO INFORMATION	NO INFORMATION	NextSeq	2021-04-21	unknown
Sample 63	+	B.1.1.7	17.5116	OPC	20I/501Y.V1	0.450241	394.72	IN	29	F	BLACK	Unknown	NextSeq	2021-05-21	unknown
Sample 64	+	B.1.1.7	20.0001	OPC	20I/501Y.V1	0.277607	573.34	KY	65	M	WHITE	Unknown	NextSeq	2021-05-21	unknown
Sample 65	+	B.1.1.7	20.8876	OPC	20I/501Y.V1	0.442512	456.42	KY	74	F	WHITE	Unknown	NextSeq	2021-05-21	unknown
Sample 66	+	Could Not Generate	27.8613	OPC	20I/501Y.V1	0.781312	321.82	KY	86	M	WHITE	Unknown	NextSeq	2021-05-21	unknown
Sample 67	+	Could Not Generate	24.0364	OPC	20I/501Y.V1	0.616039	258.95	KY	31	F	WHITE	NON HISPANIC OR LATINO	NextSeq	2021-05-21	unknown
Sample 68	+	Could Not Generate	27.4852	OPC	20I/501Y.V1	0.705448	458.53	TN	63	F	UNKNOWN	Unknown	NextSeq	2021-05-21	unknown
Sample 69	+	B.1.1.7	26.056	OPC	20I/501Y.V1	0.31808	416.27	TN	70	M	WHITE	WHITE	NextSeq	2021-04-21	unknown
Sample 70	+	Could Not Generate	23.4133	OPC	20I/501Y.V1	0.73097	407.48	NA		NA	NO INFORMATION	NO INFORMATION	NextSeq	2021-05-21	unknown
Sample 71	+	Could Not Generate	21.2057	OPC	20I/501Y.V1	0.752718	367.81	KY	81	M	UNKNOWN	Unknown	NextSeq	2021-05-21	unknown
Sample 72	+	B.1.1.7	19.2328	OPC	20I/501Y.V1	0.331516	493.06	KY	29	F	WHITE	NON HISPANIC OR LATINO	NextSeq	2021-05-21	unknown
Sample 73	+	Could Not Generate	22.5418	OPC	20I/501Y.V1	0.737492	235.34	FL	40	F	BLACK	NON HISPANIC OR LATINO	NextSeq	2021-05-21	unknown
Sample 74	+	B.1.1.7	8.5265	OPC	20I/501Y.V1	0.00254317	1169.21	NA		NA	NO INFORMATION	NO INFORMATION	NextSeq	2021-05-21	unknown
Sample 75	+	B.1.1.7	13.8098	OPC	20I/501Y.V1	0.0213492	931.8	NA		NA	NO INFORMATION	NO INFORMATION	NextSeq	2021-05-21	unknown
Sample 76	+	B.1.1.7	20.7618	OPC	20I/501Y.V1	0.407319	494.3	KY	33	F	BLACK	NON HISPANIC OR LATINO	NextSeq	2021-05-21	unknown
Sample 77	+	B.1.617.2	20.4381	S	21A (Delta)	0.0044831	2311.26	WV					NovaSeq	2021-09-21	unknown
Sample 78	+	B.1.617.2	20.6547	S	21A (Delta)	0.00264302	1507.25	MN					NovaSeq	2021-08-21	unknown
Sample 79	+	AY.3.1	12.4891	S	21A (Delta)	0.00853128	1839.27	MN					NextSeq	2021-08-21	unknown
Sample 80	+	B.1.575	27.3001	S	21A (Delta)	0.426574	304.43	MN					NovaSeq	2021-09-21	unknown
Sample 81	+	B.1.1.7	20.4098	S	20I/501Y.V1	0.00247624	2240.97	MN	17	M	WHITE	NON HISPANIC OR LATINO	NovaSeq	2021-05-21	yes
Sample 82	+	AY.4	21.2314	S	21A (Delta)	0.00685848	2560.69	MN					NovaSeq	2021-10-21	unknown
Sample 83	+	B.1.1.7	14.3981	S	20I/501Y.V1	0.00264356	1252.73	NA		NA	NO INFORMATION	NO INFORMATION	NextSeq	2021-05-21	unknown
Sample 84	+	AY.24	19.2785	S	21A (Delta)	0.00274339	1477.54	NJ					NextSeq	2021-09-21	unknown
Sample 85	+	Could Not Generate	23.0832	S	21A (Delta)	0.246421	322.31	WY					NextSeq	2021-10-21	unknown
Sample 86	+	Could Not Generate	24.6749	S	21A (Delta)	0.494425	363.69	PA					NextSeq	2021-09-21	unknown
Sample 87	+	B.1.617.2	29.7577	S	21A (Delta)	0.347002	283.28	MN					NextSeq	2021-09-21	unknown
Sample 88	+	B.1.1.7	16.2471	S	20I/501Y.V1	0.000334627	2459.72	MN	9	M	BLACK	DECLINE TO IDENTIFY	NovaSeq	2021-04-21	no
Sample 89	+	B.1.617.2	25.3886	S	21A (Delta)	0.0701907	659.88	MN					NovaSeq	2021-09-21	unknown
Sample 90	+	B.1.617.2	24.0305	S	21A (Delta)	0.0157912	938.62	MN					NextSeq	2021-09-21	unknown
Sample 91	+	B.1.617.2	11.9667	S	21A (Delta)	0.00849783	1487.44	MN					NextSeq	2021-09-21	unknown
Sample 92	+	AY.3	23.0407	S	21A (Delta)	0.292371	962.88	NJ					NextSeq	2021-10-21	unknown
Sample 93	+	B.1.429	25.7154	S	20C	0.0171555	888	MN	43	F	WHITE	NON HISPANIC OR LATINO	NextSeq	2021-04-21	no
Sample 94	+	AY.25	23.6996	S	21A (Delta)	0.018635	1191.4	MN					NextSeq	2021-10-21	unknown
Sample 95	+	AY.25	21.1368	S	21A (Delta)	0.00224155	2773.48	WY					NovaSeq	2021-10-21	unknown
Sample 96	+	B.1.1.7	18.0705	S	20I/501Y.V1	0.00117186	1217.21	MN	27	F	WHITE	UNKNOWN	NextSeq	2021-04-21	no
Sample 97	+	P.1	19.2406	S	20J (GAMMA, V3)	0.00264232	1834.99	MN		NA	NO INFORMATION	NO INFORMATION	NovaSeq	2021-05-21	yes
Sample 98	+	B.1.1.7	20.4658	S	20I/501Y.V1	0.00277871	1358.31	MN	37	F	WHITE	UNKNOWN	NextSeq	2021-05-21	no
Sample 99	+	B.1.1.7	13.6668	S	20I/501Y.V1	0.000568866	1393.02	MN	18	M	WHITE	UNKNOWN	NextSeq	2021-04-21	no
Sample 100	+	B.1.1.7	18.7409	S	20I/501Y.V1	0.00153929	1568.87	FL	21	F	NO INFORMATION	NO INFORMATION	NextSeq	2021-04-21	unknown
Sample 101	+	AY.26	25.0893	S	21A (Delta)	0.0373034	775.22	MN					NextSeq	2021-09-21	unknown
Sample 102	+	B.1.617.2	20.0192	S	21A (Delta)	0.0126129	1999.95	MN					NovaSeq	2021-09-21	unknown
Sample 103	+	B.1.526.1	19.7439	S	20C	0.0501506	1259.51	NA		NA	NO INFORMATION	NO INFORMATION	NextSeq	2021-05-21	unknown
Sample 104	+	AY.3	16.4376	S	21A (Delta)	0.0170626	1491.15	MN					NovaSeq	2021-09-21	unknown
Sample 105	+	AY.4	27.6765	S	21A (Delta)	0.0987989	696.06	MN					NextSeq	2021-10-21	unknown
Sample 106	+	B.1.427	21.8006	S	20C	0.00244123	3024.65	MN	22	F	WHITE	DECLINE TO IDENTIFY	NovaSeq	2021-04-21	no
Sample 107	+	AY.25	22.9626	S	21A (Delta)	0.02091	1165.12	MN					NextSeq	2021-09-21	unknown
Sample 108	+	B.1.617.2	22.7522	S	21A (Delta)	0.0228709	710.84	ND					NovaSeq	2021-08-21	unknown
Sample 109	+	B.1.1.7	21.6518	S	20I/501Y.V1	0.00120466	2795.93	MN	48	M	WHITE	NON HISPANIC OR LATINO	NovaSeq	2021-04-21	no
Sample 110	+	B.1.1	28.27	S	20B	0.142709	655.25	NA		NA	NO INFORMATION	NO INFORMATION	NextSeq	2021-04-21	no
Sample 111	+	AY.25	29.8279	S	21A (Delta)	0.0489796	690.62	MN					NextSeq	2021-10-21	unknown
Sample 112	+	B.1.577	25.305	S	20G	0.325352	265.03	WA	21	M	WHITE	NON HISPANIC OR LATINO	NextSeq	2021-04-21	no
Sample 113	+	B.1.617.2	23.8507	S	21A (Delta)	0.00491803	1095.58	MN					NovaSeq	2021-08-21	unknown
Sample 114	+	B.1.617.2	25.1108	S	21A (Delta)	0.0857812	672.43	MN					NovaSeq	2021-08-21	unknown
Sample 115	+	B.1.617.2	23.6241	S	21A (Delta)	0.0224155	1550.91	CA					NextSeq	2021-07-21	unknown
Sample 116	+	B.1.1.7	26.3641	S	20I/501Y.V1	0.13524	674.67	MN	10	M	ASIAN	NON HISPANIC OR LATINO	NextSeq	2021-05-21	no
Sample 117	+	B.1.1.7	18.4379	S	20I/501Y.V1	0.00244278	2677	MN	17	M	AMERICAN INDIAN OR ALASKAN TIVE	NON HISPANIC OR LATINO	NovaSeq	2021-05-21	no
Sample 118	+	B.1.526.2	13.8807	S	20C	0.00160696	1325.25	MN	14	M	WHITE	NON HISPANIC OR LATINO	NextSeq	2021-04-21	no
Sample 119	+	B.1.2	24.7133	S	20G	0.00826004	502.06	MN	39	F	WHITE	NON HISPANIC OR LATINO	NextSeq	2021-04-21	no
Sample 120	+	B.1.2	28.8315	S	20C	0.114541	554.08	NJ	50	F	WHITE	NON HISPANIC OR LATINO	NextSeq	2021-04-21	no
Sample 121	+	AY.4	26.4762	S	21A (Delta)	0.038374	758.98	MN					NovaSeq	2021-08-21	unknown
Sample 122	+	B.1.1.7	16.8115	S	20I/501Y.V1	0.00230893	3346.22	MN	24	M	WHITE	NON HISPANIC OR LATINO	NovaSeq	2021-04-21	no
Sample 123	+	AY.4	20.5834	S	21A (Delta)	0.0175309	1345.34	MN					NextSeq	2021-10-21	unknown
Sample 124	+	Could Not Generate	23.8608	S	21A (Delta)	0.0309803	859.58	MN					NextSeq	2021-09-21	unknown
Sample 125	+	B.1.617.2	25.9887	S	21A (Delta)	0.0899967	480.84	NY					NovaSeq	2021-08-21	unknown
Sample 126	+	B.1.617.2	18.4795	S	21A (Delta)	0.0133824	1028.67	MN					NovaSeq	2021-08-21	unknown
Sample 127	+	Could Not Generate	27.1192	S	21A (Delta)	0.0730345	476.09	MN					NextSeq	2021-09-21	unknown
Sample 128	+	B.1.1.7	28.6941	S	20I/501Y.V1	0.161926	919.43	MN	42	F	ASIAN	NON HISPANIC OR LATINO	NovaSeq	2021-04-21	yes
Sample 129	+	B.1.617.2	21.6904	S	21A (Delta)	0.0160254	1090.7	MN					NextSeq	2021-10-21	unknown
Sample 130	+	B.1.526	24.9616	S	20C	0.00511432	1291.83	NA		NA	NO INFORMATION	NO INFORMATION	NextSeq	2021-06-21	unknown
Sample 131	+	B.1.1.7	24.974	S	20I/501Y.V1	0.0310199	784.59	MN	30	F	WHITE	DECLINE TO IDENTIFY	NextSeq	2021-05-21	no
Sample 132	+	B.1.617.2	19.0223	S	21A (Delta)	0.00254266	2905.4	WV					NovaSeq	2021-10-21	unknown
Sample 133	+	B.1.1.7	20.6185	S	20I/501Y.V1	0.00281087	1373.74	MN	23	F	OTHER	HISPANIC OR LATINO	NextSeq	2021-05-21	no
Sample 134	+	AY.12	29.656	S	21A (Delta)	0.266466	250.84						NovaSeq	2021-08-21	unknown
Sample 135	+	Could Not Generate	22.6072	S	20A	0.599739	258.73	OH					NextSeq	2021-09-21	unknown
Sample 136	+	B.1.1.7	26.1566	S	20I/501Y.V1	0.0706185	766.49	MN	18	F	WHITE	NON HISPANIC OR LATINO	NextSeq	2021-05-21	no
Sample 137	+	B.1.1.7	19.7005	S	20I/501Y.V1	0.00274394	1164.62	MN	34	F	ASIAN	NON HISPANIC OR LATINO	NextSeq	2021-05-21	no
Sample 138	+	B.1.1.7	23.1074	S	20I/501Y.V1	0.110193	654.52	MN	16	M	WHITE	NON HISPANIC OR LATINO	NextSeq	2021-05-21	no
Sample 139	+	B.1.1.7	18.8703	S	20I/501Y.V1	0.00177352	1561.87	MN	21	M	WHITE	DECLINE TO IDENTIFY	NextSeq	2021-04-21	no
Sample 140	+	AY.3	17.978	S	21A (Delta)	0.0154901	2228.11	CO					NextSeq	2021-10-21	unknown
Sample 141	+	B.1.617.2	14.5654	S	21A (Delta)	0.0105721	1593.56						NextSeq	2021-10-21	unknown
Sample 142	+	AY.25	22.2739	S	21A (Delta)	0.0194045	1155.93	MN					NovaSeq	2021-10-21	unknown
Sample 143	+	B.1.617.2	19.853	S	21A (Delta)	0.00451656	1096.06	NM					NovaSeq	2021-08-21	unknown
Sample 144	+	B.1.617.2	19.726	S	21A (Delta)	0.00260957	1530.34	MN					NextSeq	2021-08-21	unknown
Sample 145	+	B.1.1.7	16.8689	S	20I/501Y.V1	0.00160621	1345.37	WI	44	M	WHITE	NON HISPANIC OR LATINO	NextSeq	2021-04-21	no
Sample 146	+	B.1.2	22.5232	S	20G	0.0394275	685.57	NA		NA	NO INFORMATION	NO INFORMATION	NextSeq	2021-04-21	no
Sample 147	+	B.1.617.2	23.5954	S	21A (Delta)	0.0170626	1105.21	WY					NextSeq	2021-09-21	unknown
Sample 148	+	AY.6	24.169	S	21A (Delta)	0.0326865	820.47	MD					NovaSeq	2021-08-21	unknown
Sample 149	+	AY.3	23.9345	S	21A (Delta)	0.0396454	849.56	PA					NextSeq	2021-10-21	unknown
Sample 150	+	B.1.526	20.5883	S	20C	0.00919948	1003.6	NJ	21	M	NO INFORMATION	NO INFORMATION	NextSeq	2021-04-21	unknown
Sample 151	+	Could Not Generate	29.5409	S	21A (Delta)	0.0862744	893.52	MN					NovaSeq	2021-09-21	unknown
Sample 152	+	B.1.1.7	27.028	S	20I/501Y.V1	0.0250636	756.15	WI	46	F	WHITE	DECLINE TO IDENTIFY	NextSeq	2021-05-21	yes
Sample 153	+	AY.25	23.8994	S	21A (Delta)	0.0154901	1079.8	MN					NextSeq	2021-10-21	unknown
Sample 154	+	AY.3	21.9104	S	21A (Delta)	0.0102041	1159.91	NJ					NovaSeq	2021-08-21	unknown
Sample 155	+	B.1.617.2	19.7393	S	21A (Delta)	0.0180997	1341.38	MN					NextSeq	2021-07-21	unknown
Sample 156	+	B.1.1.7	15.9541	S	20I/501Y.V1	0.0034132	1274.17	MN	47	M	ASIAN	NON HISPANIC OR LATINO	NextSeq	2021-05-21	no
Sample 157	+	Could Not Generate	23.5403	S	21A (Delta)	0.00655738	1531.71	MN					NovaSeq	2021-09-21	unknown
Sample 158	+	B.1.1.7	29.3783	S	20I/501Y.V1	0.251975	466.74	MN	8	F	DECLINE TO IDENTIFY	DECLINE TO IDENTIFY	NextSeq	2021-05-21	no
Sample 159	+	B.1.617.2	14.7767	S	21A (Delta)	0.334381	1567.39	NM					NovaSeq	2021-09-21	unknown
Sample 160	+	B.1.2	27.741	S	20G	0.0903254	280.17	MN	42	F	WHITE	NON HISPANIC OR LATINO	NextSeq	2021-04-21	no
Sample 161	+	AY.4	19.3803	S	21A (Delta)	0.00240883	1637.19	MN					NextSeq	2021-08-21	unknown
Sample 162	+	B.1.1.7	18.9031	S	20I/501Y.V1	0.00237585	2708.07	MN	56	F	WHITE	UNKNOWN	NovaSeq	2021-05-21	no
Sample 163	+	A	28.6369	S	21A (Delta)	0.416536	313.18	MN					NextSeq	2021-10-21	unknown
Sample 164	+	B.1.1.7	29.1543	S	20I (ALPHA, V1)	0.0822294	738.6	MN	6	M	BLACK	NON HISPANIC OR LATINO	NovaSeq	2021-05-21	no
Sample 165	+	B.1.427	25.4787	S	20C	0.0173227	1075.35	MN	12	F	OTHER	NON HISPANIC OR LATINO	NextSeq	2021-04-21	no
Sample 166	+	B.1.1.7	18.072	S	20I/501Y.V1	0.00130505	1471.52	MN	42	M	WHITE	NON HISPANIC OR LATINO	NextSeq	2021-04-21	no
Sample 167	+	AY.3	24.2358	S	21A (Delta)	0.106436	430.07	MN					NextSeq	2021-10-21	unknown
Sample 168	+	B.1.617.2	22.6002	S	21A (Delta)	0.0279023	931.62	MN					NextSeq	2021-10-21	unknown
Sample 169	+	B.1.617.2	22.4939	S	21A (Delta)	0.011442	1267.37	MN					NextSeq	2021-10-21	unknown
Sample 170	+	B.1	26.6983	S	21A (Delta)	0.49868	327.92	WI					NextSeq	2021-09-21	unknown
Sample 171	+	AY.3	18.7488	S	21A (Delta)	0.0232185	1666.54	MN					NextSeq	2021-10-21	unknown
Sample 172	+	AY.4	26.527	S	21A (Delta)	0.0535296	831.99	MN					NovaSeq	2021-09-21	unknown
Sample 173	+	AY.25	17.231	S	21A (Delta)	0.00612245	1206.42	MN					NextSeq	2021-10-21	unknown
Sample 174	+	AY.3	24.5097	S	21A (Delta)	0.0171629	1135.24	MN					NovaSeq	2021-08-21	unknown
Sample 175	+	B.1.617.2	23.8932	S	21A (Delta)	0.0199732	1027.76	MN					NovaSeq	2021-09-21	unknown
Sample 176	+	B.1.1.7	25.9638	S	20I (ALPHA, V1)	0.02242	856.02	MN	16	M	BLACK	UNKNOWN	NovaSeq	2021-06-21	no
Sample 177	+	B.1.617.2	18.1869	S	21A (DELTA)	0.00960187	1795.97	CA	32	F	WHITE	HISPANIC OR LATINO	NextSeq	2021-06-21	no
Sample 178	+	B.1.617.2	25.6781	S	21A (Delta)	0.0196052	946.92	MN					NextSeq	2021-09-21	unknown
Sample 179	+	B.1.617.2	14.7594	S	21A (Delta)	0.00960187	1925.12	MN					NovaSeq	2021-08-21	unknown
Sample 180	+	B.1.617.2	18.6048	S	21A (Delta)	0.0166945	1388.52	MN					NextSeq	2021-10-21	unknown
Sample 181	+	AY.4	22.8113	S	21A (Delta)	0.0102041	1213.39	MN					NextSeq	2021-08-21	unknown
Sample 182	+	AY.5	19.5712	S	21A (Delta)	0.140353	620.94	MN					NovaSeq	2021-10-21	unknown
Sample 183	+	AY.25	18.2357	S	21A (Delta)	0.010639	1825.66	MN					NextSeq	2021-10-21	unknown
Sample 184	-	Sample Not Detected	22.1199	S				MN					NextSeq	2021-10-21	unknown
Sample 185	+	B.1.258.17	21.2207	S	20A	0.801991	1380.56	CA	38	M	OTHER	HISPANIC OR LATINO	NextSeq	2021-04-21	no
Sample 186	+	B.1.1.7	12.6644	S	20I/501Y.V1	0.0025097	1596.62	MN	63	NA	NO INFORMATION	NO INFORMATION	NextSeq	2021-05-21	no
Sample 187	+	B.1	27.8183	S	20B	0.094539	229.72	MN	28	M	WHITE	DECLINE TO IDENTIFY	NextSeq	2021-04-21	no
Sample 188	+	B.1.429	26.5894	S	20C	0.0104337	1766.02	MN	7	M	WHITE	NON HISPANIC OR LATINO	NovaSeq	2021-04-21	no
Sample 189	+	B.1.1.7	24.5157	S	20I/501Y.V1	0.0227212	858.22	MN	7	M	BLACK	NON HISPANIC OR LATINO	NextSeq	2021-05-21	no
Sample 190	+	AY.3	26.3513	S	21A (Delta)	0.133222	361.53						NovaSeq	2021-09-21	unknown
Sample 191	+	AY.25	24.652	S	21A (Delta)	0.0491803	970.03	MN					NextSeq	2021-09-21	unknown
Sample 192	+	B.1.1.7	22.709	S	20I/501Y.V1	0.00230893	2303.68	MN	43	M	WHITE	NON HISPANIC OR LATINO	NovaSeq	2021-05-21	no
Sample 193	+	B.1.1.7	23.203	S	20I/501Y.V1	0.000803105	2146.37	NA		NA	NO INFORMATION	NO INFORMATION	NovaSeq	2021-04-21	no
Sample 194	+	AY.4	22.1636	S	21A (Delta)	0.00518568	1176.83	MN					NextSeq	2021-10-21	unknown
Sample 195	+	B.1.1.7	18.7355	S	20I/501Y.V1	0.00163967	1430.03	MN	12	M	WHITE	NON HISPANIC OR LATINO	NextSeq	2021-04-21	no
Sample 196	+	Could Not Generate	25.9738	S	19A	0.761195	382.49						NovaSeq	2021-08-21	unknown
Sample 197	+	B.1.1.7	21.667	S	20I/501Y.V1	0.000602329	2717.19	MN	47	M	WHITE	UNKNOWN	NovaSeq	2021-04-21	no
Sample 198	+	AY.25	26.0768	S	21A (Delta)	0.0196387	1056.16	MN					NextSeq	2021-10-21	unknown
Sample 199	+	AY.3	21.1547	S	21A (Delta)	0.0223486	1214.72	MN					NextSeq	2021-10-21	unknown
Sample 200	+	B.1.617.2	19.3302	S	21A (Delta)	0.011442	1638.54	CA					NovaSeq	2021-07-21	unknown
Sample 201	+	B.1.1.7	25.869	S	20I/501Y.V1	0.0302503	796.75	MN	34	F	ASIAN	NON HISPANIC OR LATINO	NextSeq	2021-04-21	no
Sample 202	+	B.1.617.2	20.9966	S	21A (Delta)	0.0223821	921.84	MN					NovaSeq	2021-09-21	unknown
Sample 203	+	AY.4	21.6086	S	21A (Delta)	0.00361325	1177.9	MN					NextSeq	2021-10-21	unknown
Sample 204	+	B.1.1.7	18.403	S	20I/501Y.V1	0.000702717	2243.81	MN	56	F	WHITE	NON HISPANIC OR LATINO	NovaSeq	2021-04-21	no
Sample 205	+	B.1.526	21.393	S	20C	0.0443248	1290.76	NA		NA	NO INFORMATION	NO INFORMATION	NextSeq	2021-05-21	unknown
Sample 206	+	B.1.429	18.5399	S	20C	0.00264188	1418.07	NJ	28	F	BLACK	NON HISPANIC OR LATINO	NextSeq	2021-05-21	no
Sample 207	+	B.1.617.2	13.9575	S	21A (Delta)	0.0142188	1568.73	MN					NextSeq	2021-10-21	unknown
Sample 208	+	B.1.1.7	24.5208	S	20I/501Y.V1	0.0231562	705.36	MN	14	F	WHITE	NON HISPANIC OR LATINO	NextSeq	2021-04-21	no
Sample 209	+	B.1.1.7	23.246	S	20I/501Y.V1	0.00876723	951.69	NA		NA	NO INFORMATION	NO INFORMATION	NextSeq	2021-04-21	no
Sample 210	+	B.1.1.7	22.5248	S	20I/501Y.V1	0.000234239	1100.17	MN	48	F	WHITE	NON HISPANIC OR LATINO	NextSeq	2021-04-21	no
Sample 211	+	B.1.617.2	14.3231	S	21A (Delta)	0.0025092	1455.25	MN					NovaSeq	2021-09-21	unknown
Sample 212	+	B.1.1.1	25.6804	S	20D	0.00244368	1006.75	NA		NA	NO INFORMATION	NO INFORMATION	NextSeq	2021-04-21	no
Sample 213	+	AY.25	26.7916	S	21A (Delta)	0.0484778	711.44	MN					NextSeq	2021-09-21	unknown
Sample 214	+	B.1.1.7	17.4591	S	20I/501Y.V1	0.00277741	1216.08	MN	49	M	WHITE	DECLINE TO IDENTIFY	NextSeq	2021-05-21	no
Sample 215	+	A	29.5259	S	20B	0.396564	421.75	ND	23	F	WHITE	NON HISPANIC OR LATINO	NovaSeq	2021-06-21	no
Sample 216	+	B.1.617.2	21.5871	S	21A (Delta)	0.00267648	1261.44	WY					NextSeq	2021-09-21	unknown
Sample 217	+	B.1.1.7	22.2062	S	20I/501Y.V1	0.00157275	1056.64	MN	31	F	OTHER	HISPANIC OR LATINO	NextSeq	2021-04-21	no
Sample 218	+	B.1.617.2	26.3247	S	21A (Delta)	0.0385748	908.83	MN					NovaSeq	2021-08-21	unknown
Sample 219	+	AY.44	29.5231	S	21A (Delta)	0.146073	463.29	MN					NextSeq	2021-10-21	unknown
Sample 220	+	Could Not Generate	24.0203	S	20A	0.907575	223.02	NJ	22	M	WHITE	NO INFORMATION	NextSeq	2021-04-21	no
Sample 221	+	AY.4	23.5111	S	21A (Delta)	0.0317497	829.59	MN					NextSeq	2021-10-21	unknown
Sample 222	+	AY.33	28.7696	S	21A (Delta)	0.423469	371.95	WV					NextSeq	2021-10-21	unknown
Sample 223	+	B.1.617.2	22.5137	S	21A (Delta)	0.0162262	1195.79	MN					NextSeq	2021-09-21	unknown
Sample 224	+	AY.3	24.2794	S	21A (Delta)	0.0400134	724.88	NM					NextSeq	2021-09-21	unknown
Sample 225	+	B.1.526.2	24.1339	S	21F (IOTA)	0.00411784	1330.47	NJ	36	M	WHITE	HISPANIC OR LATINO	NovaSeq	2021-06-21	no
Sample 226	+	B.1.526.1	28.548	S	20C	0.0645366	606.1	MN	27	F	BLACK	HISPANIC OR LATINO	NextSeq	2021-05-21	no
Sample 227	+	B.1.1.7	14.4913	S	20I/501Y.V1	0.0031455	1297.01	WI	66	M	WHITE	DECLINE TO IDENTIFY	NextSeq	2021-05-21	no
Sample 228	+	B.1.617.2	21.89	S	21A (Delta)	0.0361659	727.63	NY					NovaSeq	2021-09-21	unknown
Sample 229	+	AY.3	12.8781	S	21A (Delta)	0.00699231	1863.32	NM					NextSeq	2021-10-21	unknown
Sample 230	+	B.1.1.7	22.5919	S	20I/501Y.V1	0.00163967	1477.01	MN	11	M	DECLINE TO IDENTIFY	DECLINE TO IDENTIFY	NextSeq	2021-04-21	no
Sample 231	+	B.1.1.7	18.9676	S	20I (ALPHA, V1)	0.00639138	1169.55	MN	19	F	ASIAN	DECLINE TO IDENTIFY	NextSeq	2021-06-21	no
Sample 232	+	B.1.617.2	21.032	S	21A (Delta)	0.00843091	1315.5						NextSeq	2021-09-21	unknown
Sample 233	+	AY.12	21.0239	S	21A (Delta)	0.00548678	1758.38	MN					NextSeq	2021-08-21	unknown
Sample 234	+	B.1.1.519	21.3156	S	20B	0.000969802	2637.49	MN	31	M	DECLINE TO IDENTIFY	DECLINE TO IDENTIFY	NovaSeq	2021-04-21	no
Sample 235	+	B.1.1.7	26.1949	S	20I/501Y.V1	0.0388168	652.46	MN	27	M	WHITE	NON HISPANIC OR LATINO	NextSeq	2021-04-21	no
Sample 236	+	Could Not Generate	27.8612	S	21A (Delta)	0.106515	616.83	MN					NextSeq	2021-09-21	unknown
Sample 237	+	AY.26	19.1446	S	21A (Delta)	0.0102041	1649.3	MN					NextSeq	2021-10-21	unknown
Sample 238	+	AY.4	20.4909	S	21A (Delta)	0.0104383	1234.38	MN					NextSeq	2021-08-21	unknown
Sample 239	+	B.1.1.7	24.7872	S	20I/501Y.V1	0.0240597	717.25	MN	41	F	BLACK	DECLINE TO IDENTIFY	NextSeq	2021-04-21	no
Sample 240	+	B.1.617.2	21.5064	S	21A (Delta)	0.0129475	1607.64	MN					NextSeq	2021-07-21	unknown
Sample 241	+	AY.25	18.2536	S	21A (Delta)	0.0335564	665.66	MN					NovaSeq	2021-09-21	unknown
Sample 242	+	B.1.1.7	20.4564	S	20I/501Y.V1	0.00244278	1876.53	MN	30	M	WHITE	HISPANIC OR LATINO	NovaSeq	2021-05-21	no
Sample 243	+	AY.4	22.3887	S	21A (Delta)	0.00880689	2483.91	ID					NovaSeq	2021-10-21	unknown
Sample 244	+	AY.24	26.9651	S	21A (Delta)	0.0827619	613.1	MN					NextSeq	2021-10-21	unknown
Sample 245	+	AY.4	15.7831	S	21A (Delta)	0.00230846	1868.62	MA					NovaSeq	2021-08-21	unknown
Sample 246	+	B.1.618	25.6296	S	20A	0.00996589	1919.72	NA		NA	NO INFORMATION	NO INFORMATION	NovaSeq	2021-04-21	unknown
Sample 247	+	B.1.1.7	29.2088	S	20I/501Y.V1	0.00127158	2311.64	MN	6	M	WHITE	NON HISPANIC OR LATINO	NovaSeq	2021-04-21	no
Sample 248	+	B.1.617.2	21.4498	S	21A (Delta)	0.0182616	1324.43						NextSeq	2021-09-21	unknown
Sample 249	-	Sample Not Detected	17.9954	S				NA		NA	NO INFORMATION	NO INFORMATION	NextSeq	2021-04-21	no
Sample 250	+	B.1.1.7	26.2903	S	20I/501Y.V1	0.0300495	708.08	MN	50	M	WHITE	NON HISPANIC OR LATINO	NextSeq	2021-04-21	no
Sample 251	+	B.1.1.7	20.6974	S	20I/501Y.V1	0.00163967	1226.89	MN	16	F	OTHER	NON HISPANIC OR LATINO	NextSeq	2021-04-21	no
Sample 252	+	AY.4	22.2548	S	21A (Delta)	0.0088993	2277.9	MN					NovaSeq	2021-10-21	unknown
Sample 253	+	B.1.1.7	22.8863	S	20I/501Y.V1	0.0017066	1325.52	MN	63	M	WHITE	NON HISPANIC OR LATINO	NextSeq	2021-04-21	no
Sample 254	-	Sample Not Detected	28.2011	S				MN					NextSeq	2021-09-21	unknown
Sample 255	+	B.1.617.2	19.8649	S	21A (Delta)	0.00903312	2602.37	MN					NovaSeq	2021-10-21	unknown
Sample 256	+	B.1.617.2	20.5727	S	21A (Delta)	0.0136835	1251.03	MN					NextSeq	2021-09-21	unknown
Sample 257	+	AY.16	26.8225	S	21A (Delta)	0.0261908	1181.04	MN					NovaSeq	2021-09-21	unknown
Sample 258	+	B.1.617.2	27.2608	S	21A (Delta)	0.0279358	779.21	OH					NextSeq	2021-09-21	unknown
Sample 259	+	B.1.526.1	28.5091	S	20A	0.0353295	1474.5	MN	19	F	UNKNOWN	HISPANIC OR LATINO	NovaSeq	2021-04-21	no
Sample 260	+	B.1.1.7	18.5041	S	20I/501Y.V1	0.0411926	1290.64	MN	19	F	WHITE	NON HISPANIC OR LATINO	NextSeq	2021-05-21	no
Sample 261	+	B.1.617.2	29.5143	S	21A (Delta)	0.17223	958.6	MN					NovaSeq	2021-09-21	unknown
Sample 262	+	B.1.1.7	16.7715	S	20I/501Y.V1	0.0025097	1392.19	MN	35	M	OTHER	HISPANIC OR LATINO	NextSeq	2021-04-21	no
Sample 263	+	B.1.1.7	19.2134	S	20I/501Y.V1	0.00240932	1216.86	MN	39	F	WHITE	NON HISPANIC OR LATINO	NextSeq	2021-04-21	yes
Sample 264	+	B.1.1.7	23.7222	S	20I/501Y.V1	0.0189734	1732.95	MN	44	F	WHITE	NON HISPANIC OR LATINO	NovaSeq	2021-05-21	yes
Sample 265	+	B.1.1.7	17.359	S	20I/501Y.V1	0.0378798	1425.17	MN	6	M	WHITE	NON HISPANIC OR LATINO	NextSeq	2021-05-21	no
Sample 266	+	B.1.617.2	26.2427	S	21A (Delta)	0.0315825	1143.56	CA					NextSeq	2021-10-21	unknown
Sample 267	+	AY.3	12.831	S	21A (Delta)	0.0132811	1309.78	CA					NovaSeq	2021-08-21	unknown
Sample 268	+	AY.12	24.5356	S	21A (Delta)	0.0208096	819.61	MN					NextSeq	2021-08-21	unknown
Sample 269	+	B.1.617.2	15.7931	S	21A (Delta)	0.0192707	1337.18	MN					NextSeq	2021-09-21	unknown
Sample 270	+	B.1.617.2	27.559	S	21A (Delta)	0.238688	320.83	NM					NovaSeq	2021-10-21	unknown
Sample 271	+	B.1.1.7	24.5132	S	20I/501Y.V1	0.01208	1153.6	NJ	51	F	WHITE	UNKNOWN	NextSeq	2021-04-21	no
Sample 272	+	B.1.617.2	21.5919	S	21A (Delta)	0.0249866	758.11	WY					NovaSeq	2021-09-21	unknown
Sample 273	+	B.1.1.7	13.6933	S	20I/501Y.V1	0.000635792	1612.04	MN	48	M	WHITE	NON HISPANIC OR LATINO	NextSeq	2021-04-21	no
Sample 274	+	B.1.526	22.7727	S	20C	0.00173954	1352.18	NA		NA	NO INFORMATION	NO INFORMATION	NextSeq	2021-04-21	unknown
Sample 275	+	B.1.617.2	20.8072	S	21A (Delta)	0.031917	964.94	MN					NextSeq	2021-07-21	unknown
Sample 276	+	AY.39	26.8418	S	21A (Delta)	0.0475744	725.29	MN					NextSeq	2021-10-21	unknown
Sample 277	+	AY.12	22.1046	S	21A (Delta)	0.00896621	1105.49	MN					NextSeq	2021-08-21	unknown
Sample 278	+	B.1.1.7	11.4938	S	20I/501Y.V1	0.00244278	1564.43	MN	40	F	WHITE	NON HISPANIC OR LATINO	NextSeq	2021-05-21	no
Sample 279	+	B.1.1.7	17.2629	S	20I/501Y.V1	0.000870031	1295.72	MN	41	F	WHITE	NON HISPANIC OR LATINO	NextSeq	2021-04-21	no
Sample 280	+	B.1.561	22.9659	S	20A	0.00046818	1431.49	MN	25	M	DECLINE TO IDENTIFY	DECLINE TO IDENTIFY	NextSeq	2021-04-21	no
Sample 281	+	B.1.1.7	26.1142	S	20I/501Y.V1	0.109122	913.67	MN	5	M	WHITE	UNKNOWN	NextSeq	2021-05-21	no
Sample 282	+	B.1.1.7	22.6207	S	20I/501Y.V1	0.00886762	487.31	MN	58	F	WHITE	NON HISPANIC OR LATINO	NextSeq	2021-04-21	no
Sample 283	+	B.1.1.7	19.4917	S	20I/501Y.V1	0.00120466	2883.7	MN	46	F	WHITE	NON HISPANIC OR LATINO	NovaSeq	2021-04-21	no
Sample 284	+	B.1.1.7	28.3519	S	20I/501Y.V1	0.347988	525.31	MN	7	F	DECLINE TO IDENTIFY	DECLINE TO IDENTIFY	NextSeq	2021-05-21	no
Sample 285	+	Could Not Generate	28.4571	S	21A (Delta)	0.581085	266.46	MN					NextSeq	2021-10-21	unknown
Sample 286	+	B.1.617.2	12.2214	S	21A (Delta)	0.0128137	1516.02	CA					NovaSeq	2021-09-21	unknown
Sample 287	+	AY.39	27.7832	S	21A (Delta)	0.0250585	1010.93	MN					NovaSeq	2021-10-21	unknown
Sample 288	+	B.1.617.2	17.263	S	21A (Delta)	0.0111743	1576.87	MN					NextSeq	2021-10-21	unknown
Sample 289	+	B.1.1.7	23.8095	S	20I/501Y.V1	0.00732834	1385.43	NJ	54	M	WHITE	NON HISPANIC OR LATINO	NextSeq	2021-05-21	unknown
Sample 290	+	AY.25	26.7143	S	21A (Delta)	0.057377	774.76	MN					NextSeq	2021-10-21	unknown
Sample 291	+	B.1.1.318	24.2195	S	20B	0.00438523	1123.35	MN	16	M	ASIAN	NON HISPANIC OR LATINO	NextSeq	2021-05-21	yes
Sample 292	+	B.1.1.7	23.9286	S	20I/501Y.V1	0.0210146	1107.75	MN	14	M	ASIAN	DECLINE TO IDENTIFY	NextSeq	2021-04-21	no
Sample 293	+	B.1.617.2	28.5202	S	21A (Delta)	0.431169	194.69						NovaSeq	2021-09-21	unknown
Sample 294	+	B.1.1.7	29.188	S	20I/501Y.V1	0.0696359	488.63	MN	26	M	OTHER	HISPANIC OR LATINO	NextSeq	2021-05-21	no
Sample 295	+	B.1.617.2	16.1135	S	21A (Delta)	0.00240883	3889.6	MN					NovaSeq	2021-10-21	unknown
Sample 296	+	B.1.1.7	19.1265	S	20I/501Y.V1	0.00940302	1323.75	MN	27	M	BLACK	NON HISPANIC OR LATINO	NextSeq	2021-05-21	no
Sample 297	+	B.1.1	27.6002	S	20C	0.0683392	1322.19	MN	37	M	WHITE	NON HISPANIC OR LATINO	NovaSeq	2021-04-21	no
Sample 298	+	B.1.1.7	25.0477	S	20I/501Y.V1	0.0159952	795.92	MN	48	M	WHITE	UNKNOWN	NextSeq	2021-04-21	no
Sample 299	+	B.1.617.2	19.2267	S	21A (Delta)	0.0115866	1477.55	MN					NextSeq	2021-10-21	unknown
Sample 300	+	B.1.1.7	19.4685	S	20I (ALPHA, V1)	0.00261009	1683	MN		NA	NO INFORMATION	NO INFORMATION	NextSeq	2021-06-21	no
Sample 301	+	B.1.1.7	22.416	S	20I/501Y.V1	0.00277741	1325.32	MN	28	M	OTHER	HISPANIC OR LATINO	NextSeq	2021-05-21	no
Sample 302	+	B.1.1.7	21.7762	S	20I/501Y.V1	0.00157275	1303.52	MN	46	F	WHITE	NON HISPANIC OR LATINO	NextSeq	2021-04-21	no
Sample 303	+	B.1.526.1	23.7629	S	20C	0.000434899	2250.76	MN	33	M	BLACK	NON HISPANIC OR LATINO	NovaSeq	2021-04-21	no
Sample 304	+	AY.25	23.9624	S	21A (Delta)	0.018464	1183.37	MN					NovaSeq	2021-10-21	unknown
Sample 305	+	B.1.617.2	15.9529	S	21A (Delta)	0.00772834	2029.18	MN					NovaSeq	2021-08-21	unknown
Sample 306	+	AY.4	15.4528	S	21A (Delta)	0.00227501	1650.41	MN					NextSeq	2021-08-21	unknown
Sample 307	+	B.1.1.7	27.3458	S	20I/501Y.V1	0.00779681	1749.51	MN	51	F	WHITE	UNKNOWN	NovaSeq	2021-04-21	no
Sample 308	+	B.1.1.7	16.1305	S	20I/501Y.V1	0.00277815	1554.49	MN	34	F	WHITE	UNKNOWN	NextSeq	2021-05-21	no
Sample 309	+	P.1	23.9333	S	20J (GAMMA, V3)	0.172147	729.38	MN	8	F	WHITE	NON HISPANIC OR LATINO	NovaSeq	2021-05-21	no
Sample 310	+	B.1.1.7	21.9941	S	20I/501Y.V1	0.453472	269.71	CA	29	M	OTHER	HISPANIC OR LATINO	NextSeq	2021-04-21	no
Sample 311	+	AY.25	15.9304	S	21A (Delta)	0.226365	1608.19	MN					NovaSeq	2021-09-21	unknown
Sample 312	+	AY.44	25.1515	S	21A (Delta)	0.0164236	1113.77						NextSeq	2021-10-21	unknown
Sample 313	+	B.1.617.2	19.9636	S	21A (Delta)	0.00234192	2765.89	MN					NovaSeq	2021-10-21	unknown
Sample 314	+	B.1.617.2	24.1458	S	21A (Delta)	0.00953496	1072.2	ID					NextSeq	2021-10-21	unknown
Sample 315	+	AY.12	26.2838	S	21A (Delta)	0.182165	583.88	MN					NextSeq	2021-09-21	unknown
Sample 316	+	B.1.1.7	22.3032	S	20I/501Y.V1	0.00187391	1170.48	NA		NA	NO INFORMATION	NO INFORMATION	NextSeq	2021-04-21	no
Sample 317	+	A	28.796	S	20A	0.456367	176.65	MN					NextSeq	2021-10-21	unknown
Sample 318	+	P.1	22.1839	S	20J/501Y.V3	0.0114054	1200.01	IL	56	F	WHITE	NON HISPANIC OR LATINO	NextSeq	2021-04-21	no
Sample 319	+	AY.20	16.6049	S	21A (Delta)	0.00414854	1847.81	MN					NextSeq	2021-10-21	unknown
Sample 320	+	AY.33	29.5411	S	21A (Delta)	0.104779	1082.19	MN					NovaSeq	2021-10-21	unknown
Sample 321	+	B.1	26.7355	S	20C	0.143192	320.16	NJ	17	F	WHITE	HISPANIC OR LATINO	NextSeq	2021-04-21	no
Sample 322	+	B.1.526	20.4254	S	20C	0.15415	801.93	NJ	32	M	NO INFORMATION	NO INFORMATION	NextSeq	2021-05-21	unknown
Sample 323	+	AY.25	23.8413	S	21A (Delta)	0.00244229	2333.97	MN					NovaSeq	2021-10-21	unknown
Sample 324	+	B.1.1.7	24.5009	S	20I/501Y.V1	0.0177687	1091.37	MN	27	F	BLACK	NON HISPANIC OR LATINO	NextSeq	2021-04-21	no
Sample 325	+	AY.3	24.1232	S	21A (Delta)	0.00779525	2761.85	WY					NovaSeq	2021-09-21	unknown
Sample 326	+	B.1.617.2	11.7341	S	21A (Delta)	0.00695885	1693.19	MN					NextSeq	2021-10-21	unknown
Sample 327	+	Could Not Generate	26.6218	S	20I/501Y.V1	0.722298	305.13	ND	32	F	WHITE	NON HISPANIC OR LATINO	NextSeq	2021-04-21	no
Sample 328	+	Could Not Generate	10.0012	S	21A (Delta)	0.00237538	2835.38	MN					NovaSeq	2021-09-21	unknown
Sample 329	+	B.1.617.2	21.0918	S	21A (Delta)	0.0113081	1323.87	MN					NovaSeq	2021-09-21	unknown
Sample 330	+	AY.4	16.0764	S	21A (Delta)	0.0112078	1276.98	MN					NovaSeq	2021-09-21	unknown
Sample 331	+	B.1.617.2	17.2979	S	21A (Delta)	0.0028103	1336.18	WY					NovaSeq	2021-08-21	unknown
Sample 332	+	B.1.617.2	23.7944	S	21A (Delta)	0.0828705	871.83	MN					NextSeq	2021-08-21	unknown
Sample 333	+	B.1.617.2	16.1422	S	21A (Delta)	0.00833055	1387.15	MN					NextSeq	2021-10-21	unknown
Sample 334	+	Could Not Generate	18.3987	S	21A (Delta)	0.00254266	1568.26	MN					NextSeq	2021-09-21	unknown
Sample 335	+	B.1.1.7	17.8064	S	20I/501Y.V1	0.00160621	1560.57	MN	63	F	WHITE	UNKNOWN	NextSeq	2021-04-21	no
Sample 336	+	B.1.1.7	15.8958	S	20I/501Y.V1	0.00257689	1444.53	NJ	79	M	NO INFORMATION	NO INFORMATION	NextSeq	2021-04-21	unknown
Sample 337	+	B.1.617.2	19.9898	S	21A (Delta)	0.0715959	1024.3	MN					NextSeq	2021-10-21	unknown
Sample 338	+	AY.20	24.7117	S	21A (Delta)	0.0191703	1116.25	WY					NextSeq	2021-10-21	unknown
Sample 339	-	Sample Not Detected	22.0246	S				NJ					NovaSeq	2021-09-21	unknown
Sample 340	+	AY.20	21.3343	S	21A (Delta)	0.0365674	1419.42	NM					NextSeq	2021-10-21	unknown
Sample 341	+	B.1.1.7	27.2921	S	20I/501Y.V1	0.124176	377.37	MN	23	M	OTHER	HISPANIC OR LATINO	NextSeq	2021-05-21	no
Sample 342	+	B.1.1.7	18.4403	S	20I/501Y.V1	0.000602329	2973.63	PA	55	F	WHITE	NON HISPANIC OR LATINO	NovaSeq	2021-04-21	no
Sample 343	+	AY.25	25.4333	S	21A (Delta)	0.0223196	1050.3	NJ					NextSeq	2021-10-21	unknown
Sample 344	+	B.1.617.2	25.4386	S	21A (Delta)	0.00317832	1653.06	MN					NextSeq	2021-10-21	unknown
Sample 345	+	B.1.617.2	22.4086	S	21A (Delta)	0.0192707	919.41	MN					NovaSeq	2021-10-21	unknown
Sample 346	+	B.1.1.7	26.682	S	20I/501Y.V1	0.00706063	1121.78	MN	10	F	WHITE	NON HISPANIC OR LATINO	NextSeq	2021-05-21	no
Sample 347	+	AY.34	26.775	S	21A (Delta)	0.0637878	745.7	MN					NextSeq	2021-10-21	unknown
Sample 348	+	B.1.1.7	19.5294	S	20I/501Y.V1	0.00277741	1471.42	NJ	9	M	DECLINE TO IDENTIFY	UNKNOWN	NextSeq	2021-05-21	no
Sample 349	+	B.1.1.7	22.7943	S	20I/501Y.V1	0.00525365	1878.42	MN	71	F	WHITE	UNKNOWN	NovaSeq	2021-05-21	no
Sample 350	+	Could Not Generate	18.4134	S	21A (Delta)	0.0140515	1130.37	MN					NextSeq	2021-09-21	unknown
Sample 351	+	AY.4	18.7627	S	21A (Delta)	0.0114234	1579.3	MN					NextSeq	2021-10-21	unknown
Sample 352	+	B.1.1.7	27.1767	S	20I/501Y.V1	0.00204123	2079.72	MN	17	F	WHITE	NON HISPANIC OR LATINO	NovaSeq	2021-04-21	no
Sample 353	+	B.1.1.7	25.3598	S	20I/501Y.V1	0.0353366	655.84	MN	76	M	WHITE	NON HISPANIC OR LATINO	NextSeq	2021-04-21	no
Sample 354	+	AY.25	25.4975	S	21A (Delta)	0.0577431	591.16	SD					NovaSeq	2021-09-21	unknown
Sample 355	+	P.2	20.0507	S	20B	0.0190282	1420.43	MN	27	M	WHITE	NON HISPANIC OR LATINO	NextSeq	2021-04-21	no
Sample 356	+	B.1.617.2	17.3042	S	21A (Delta)	0.00270994	1640.53	FL					NovaSeq	2021-09-21	unknown
Sample 357	+	B.1.596	21.7148	S	20G	0.00287597	1275.96	WY	72	M	WHITE	NON HISPANIC OR LATINO	NextSeq	2021-04-21	no
Sample 358	+	AY.4	18.2417	S	21A (Delta)	0.0108063	1536.57	PA					NovaSeq	2021-08-21	unknown
Sample 359	+	B.1.1.7	25.3732	S	20I/501Y.V1	0.0126154	1470.52	MN	21	M	ASIAN	NON HISPANIC OR LATINO	NovaSeq	2021-05-21	no
Sample 360	+	B.1.1.7	16.1547	S	20I/501Y.V1	0.00147236	1467.68	MN	21	F	WHITE	NON HISPANIC OR LATINO	NextSeq	2021-04-21	no
Sample 361	+	Could Not Generate	29.1892	S	20C	0.57287	189.52	MN					NextSeq	2021-10-21	unknown
Sample 362	+	B.1.1.519	19.5529	S	20B	0.00247467	1416.04	NA		NA	NO INFORMATION	NO INFORMATION	NextSeq	2021-05-21	no
Sample 363	+	B.1.1.7	28.0122	S	20I/501Y.V1	0.131676	972.05	NA		NA	NO INFORMATION	NO INFORMATION	NextSeq	2021-05-21	unknown
Sample 364	+	AY.4	21.8482	S	21A (Delta)	0.0370358	731.19	MN					NextSeq	2021-10-21	unknown
Sample 365	+	B.1.1.7	23.9189	S	20I/501Y.V1	0.00291126	1249.14	MN	14	M	WHITE	NON HISPANIC OR LATINO	NextSeq	2021-05-21	no
Sample 366	+	B.1.526.2	21.8696	S	20C	0.00160696	1319.23	NJ	29	F	WHITE	NON HISPANIC OR LATINO	NextSeq	2021-04-21	no
Sample 367	+	B.1.617.2	20.8424	S	21A (Delta)	0.00317832	1255.03	WY					NextSeq	2021-10-21	unknown
Sample 368	+	B.1.1.7	15.4003	S	20I/501Y.V1	0.00244278	1543.41	MN	37	M	WHITE	NON HISPANIC OR LATINO	NextSeq	2021-05-21	no
Sample 369	+	AY.12	22.8894	S	21A (Delta)	0.0405966	756.14	MN					NovaSeq	2021-08-21	unknown
Sample 370	+	B.1.429	27.2257	S	20C	0.144166	482.31	MN	30	M	WHITE	DECLINE TO IDENTIFY	NextSeq	2021-04-21	no
Sample 371	+	B.1.617.2	15.8651	S	21A (Delta)	0.0028103	1523.72	MN					NovaSeq	2021-09-21	unknown
Sample 372	+	B.1.526	26.0841	S	20C	0.0104372	748.25	NA		NA	NO INFORMATION	NO INFORMATION	NextSeq	2021-04-21	no
Sample 373	+	AY.21	25.6204	S	21A (Delta)	0.0194045	1383.3	ID					NextSeq	2021-10-21	unknown
Sample 374	+	AY.4	20.734	S	21A (Delta)	0.00267648	1592.45	MN					NextSeq	2021-10-21	unknown
Sample 375	+	AY.25	22.1782	S	21A (Delta)	0.00284376	1368.08	MN					NextSeq	2021-10-21	unknown
Sample 376	+	AY.25	21.7311	S	21A (Delta)	0.0392478	989.85	NY					NextSeq	2021-09-21	unknown
Sample 377	+	B.1.1.7	23.8968	S	20I/501Y.V1	0.0184714	1067.9	TX	55	M	HISPANIC OR LATINO	HISPANIC OR LATINO	NextSeq	2021-04-21	unknown
Sample 378	+	B.1.1.7	28.2412	S	20I/501Y.V1	0.105608	547.21	MN	52	F	WHITE	NON HISPANIC OR LATINO	NextSeq	2021-05-21	no
Sample 379	+	B.1.617.2	13.8499	S	21A (Delta)	0.00237538	1967.93	MN					NextSeq	2021-08-21	unknown
Sample 380	+	B.1.1.7	24.7234	S	20I/501Y.V1	0.0320605	798.65	MN	38	M	WHITE	NON HISPANIC OR LATINO	NextSeq	2021-05-21	no
Sample 381	+	Could Not Generate	29.0194	S	21A (Delta)	0.575458	733.6	MN					NovaSeq	2021-10-21	unknown
Sample 382	+	B.1.1.7	23.1639	S	20I/501Y.V1	0.00384821	842.38	MN	46	F	AMERICAN INDIAN OR ALASKAN TIVE	HISPANIC OR LATINO	NextSeq	2021-04-21	no
Sample 383	+	AY.39	25.11	S	21A (Delta)	0.0111743	1388.25	MN					NovaSeq	2021-10-21	unknown
Sample 384	+	AY.4	25.7803	S	21A (Delta)	0.0584476	583	MN					NovaSeq	2021-09-21	unknown
Sample 385	+	AY.4	21.7072	S	21A (Delta)	0.0314486	881.84	MN					NovaSeq	2021-09-21	unknown
Sample 386	+	B.1.526.2	23.0884	S	20C	0.0231671	1138	ND	41	M	BLACK	UNKNOWN	NextSeq	2021-05-21	no
Sample 387	+	B.1.617.2	21.618	S	21A (Delta)	0.00247574	3309.79	MN					NovaSeq	2021-10-21	unknown
Sample 388	+	AY.26	24.2069	S	21A (Delta)	0.369548	220.52	MN					NextSeq	2021-10-21	unknown
Sample 389	+	B.1.1.7	25.8092	S	20I/501Y.V1	0.0145563	860.98	MN	43	F	WHITE	NON HISPANIC OR LATINO	NextSeq	2021-05-21	no
Sample 390	+	AY.36	21.2772	S	21A (Delta)	0.0233523	913.19	MN					NextSeq	2021-10-21	unknown
Sample 391	+	B.1.617.2	27.0197	S	20A	0.254282	458.98	NJ					NextSeq	2021-09-21	unknown
Sample 392	+	B.1.1.7	26.2365	S	20I/501Y.V1	0.00722795	2096.38	MN	26	F	WHITE	UNKNOWN	NovaSeq	2021-04-21	no
Sample 393	+	AY.25	19.5697	S	21A (Delta)	0.0208765	2412.83	MN					NovaSeq	2021-10-21	unknown
Sample 394	+	B	29.0707	S	20A	0.494783	346.98	MN	7	F	ASIAN	NON HISPANIC OR LATINO	NextSeq	2021-04-21	no
Sample 395	+	B.1.2	25.3324	S	20G	0.0994549	1050.56	MN	19	F	WHITE	NON HISPANIC OR LATINO	NovaSeq	2021-04-21	no
Sample 396	+	B.1.617.2	19.1392	S	21A (Delta)	0.010271	2561.93	MN					NovaSeq	2021-09-21	unknown
Sample 397	+	AY.25	20.7878	S	21A (Delta)	0.0145868	1525.16	MN					NextSeq	2021-10-21	unknown
Sample 398	+	Could Not Generate	10.9199	S	21A (Delta)	0.00237538	2522.4	MN					NovaSeq	2021-09-21	unknown
Sample 399	+	B.1.1.7	20.3747	S	20I (ALPHA, V1)	0.0113439	1144.83	WY	31	M	WHITE	NON HISPANIC OR LATINO	NextSeq	2021-06-21	no
Sample 400	+	B.1.617.2	20.6834	S	21A (Delta)	0.017795	1606.07	UT					NovaSeq	2021-07-21	unknown
Sample 401	-	Sample Not Detected	27.4911	S				MN					NextSeq	2021-09-21	unknown
Sample 402	+	B.1.1.7	25.9557	S	20I/501Y.V1	0.0329608	751.4	MN	20	M	WHITE	NON HISPANIC OR LATINO	NextSeq	2021-04-21	no
Sample 403	+	B.1.1.7	24.539	S	20I/501Y.V1	0.0347678	719.79	MN	55	F	WHITE	NON HISPANIC OR LATINO	NextSeq	2021-04-21	no
Sample 404	+	B.1.617.2	28.3717	S	21A (Delta)	0.230553	291.47	MN					NovaSeq	2021-08-21	unknown
Sample 405	+	AY.3	18.1874	S	21A (Delta)	0.0112078	1652.29	MN					NextSeq	2021-10-21	unknown
Sample 406	+	B.1.1.7	27.7931	S	20I/501Y.V1	0.127326	753.16	MN	11	F	ASIAN	NON HISPANIC OR LATINO	NextSeq	2021-05-21	no
Sample 407	+	B.1.1.7	24.4313	S	20I/501Y.V1	0.00244278	984.59	WY	37	F	HISPANIC OR LATINO	NO INFORMATION	NextSeq	2021-04-21	no
Sample 408	+	B.1.617.2	17.2057	S	21A (Delta)	0.00899967	1478.07	MN					NovaSeq	2021-08-21	unknown
Sample 409	+	AY.4	18.6961	S	21A (Delta)	0.0188023	1394.61	MN					NextSeq	2021-10-21	unknown
Sample 410	+	B.1.617.2	18.3227	S	21A (Delta)	0.0165942	1536.38	MN					NovaSeq	2021-08-21	unknown
Sample 411	+	B.1.1.7	17.9564	S	20I/501Y.V1	0.00294472	1519.33	MN	31	F	WHITE	NON HISPANIC OR LATINO	NextSeq	2021-05-21	no
Sample 412	+	Could Not Generate	25.7213	S	19A	0.651206	220.46	MN	18	F	WHITE	NON HISPANIC OR LATINO	NextSeq	2021-04-21	yes
Sample 413	+	B.1.1.7	19.2695	S	20I/501Y.V1	0.00123812	1162.43	MN	35	F	WHITE	NON HISPANIC OR LATINO	NextSeq	2021-04-21	no
Sample 414	+	AY.4	25.8871	S	21A (Delta)	0.0490761	818.23	MN					NextSeq	2021-09-21	unknown
Sample 415	+	B.1.526	22.4143	S	20C	0.0069247	881.36	NA		NA	NO INFORMATION	NO INFORMATION	NextSeq	2021-04-21	no
Sample 416	+	B.1.1.519	27.0053	S	20B	0.0220379	1314.27	MN	27	F	WHITE	NON HISPANIC OR LATINO	NovaSeq	2021-04-21	no
Sample 417	+	AY.4	24.5388	S	21A (Delta)	0.0377384	661.52	WV					NextSeq	2021-10-21	unknown
Sample 418	+	AY.4	24.3418	S	21A (Delta)	0.00368016	1494.27	MN					NextSeq	2021-10-21	unknown
Sample 419	+	B.1.429	27.1658	S	20C	0.0523516	489.47	MN	13	F	WHITE	NON HISPANIC OR LATINO	NextSeq	2021-05-21	no
Sample 420	+	AY.26	27.0942	S	21A (Delta)	0.193869	262.02	MN					NextSeq	2021-10-21	unknown
Sample 421	+	AY.3	25.5523	S	21A (Delta)	0.0290398	976.15	MN					NextSeq	2021-10-21	unknown
Sample 422	+	B.1.1.7	16.6167	S	20I/501Y.V1	0.000602329	2739.13	MN	47	F	WHITE	NON HISPANIC OR LATINO	NovaSeq	2021-04-21	no
Sample 423	+	B.1.1.7	28.9839	S	20I/501Y.V1	0.017066	1554.75	MN	27	M	WHITE	NON HISPANIC OR LATINO	NovaSeq	2021-04-21	no
Sample 424	+	B.1.617.2	21.6116	S	21A (Delta)	0.00762797	1330.92	WI					NovaSeq	2021-09-21	unknown
Sample 425	+	B.1.1.519	27.5834	S	20B	0.0218038	803.39	IN	28	F	BLACK	NON HISPANIC OR LATINO	NextSeq	2021-05-21	unknown
Sample 426	+	AY.25	25.1085	S	21A (Delta)	0.0174306	1287.54	DE	70	male		Not Hispanic or Latino	NextSeq	2021-10-21	unknown
Sample 427	+	AY.12	27.5981	S	21A (Delta)	0.181432	746.18	MN					NovaSeq	2021-08-21	unknown
Sample 428	+	AY.12	26.8361	S	21A (Delta)	0.117832	381.32	MN					NovaSeq	2021-08-21	unknown
Sample 429	+	B.1.1.7	22.5471	S	20I/501Y.V1	0.00277741	1681.36	MN	19	M	BLACK	NON HISPANIC OR LATINO	NextSeq	2021-05-21	no
Sample 430	+	B.1.1.519	21.0436	S	20B	0.00127078	3076.54	MN	28	F	WHITE	NON HISPANIC OR LATINO	NovaSeq	2021-04-21	no
Sample 431	+	B.1.617.2	24.5698	S	21A (Delta)	0.0285991	946.65	MN					NextSeq	2021-09-21	unknown
Sample 432	+	AY.3	17.9486	S	21A (Delta)	0.00695908	1512.56	MN					NextSeq	2021-10-21	unknown
Sample 433	+	B.1.617.2	28.5505	S	21A (Delta)	0.18949	758.1	MN					NovaSeq	2021-09-21	unknown
Sample 434	+	B.1.617.2	12.0697	S	21A (Delta)	0.014085	1443.14	MN					NovaSeq	2021-07-21	unknown
Sample 435	+	B	25.5593	S	21A (Delta)	0.505141	376.57	MN					NextSeq	2021-10-21	unknown
Sample 436	+	B.1.1.7	26.5447	S	20I (ALPHA, V1)	0.0521684	897.04	MN		NA	NO INFORMATION	NO INFORMATION	NextSeq	2021-06-21	no
Sample 437	+	B.1.526	22.2937	S	20A	0.00240859	2751.89	NA		NA	NO INFORMATION	NO INFORMATION	NextSeq	2021-04-21	no
Sample 438	+	AY.25	21.8752	S	21A (Delta)	0.00317832	2211.2	MN					NovaSeq	2021-10-21	unknown
Sample 439	+	AY.4	19.958	S	21A (Delta)	0.02546	972.61	MN					NextSeq	2021-10-21	unknown
Sample 440	+	B.1.617.2	12.7094	S	21A (Delta)	0.0104048	1764.72	MN					NextSeq	2021-10-21	unknown
Sample 441	+	B.1.1.7	23.4247	S	20I/501Y.V1	0.00247624	2040.32	MN	38	F	UNKNOWN	DECLINE TO IDENTIFY	NovaSeq	2021-05-21	no
Sample 442	-	Sample Not Detected	25.2319	S				MN					NextSeq	2021-10-21	unknown
Sample 443	+	B.1.1.7	20.7337	S	20I/501Y.V1	0.00237585	2845.43	NJ	33	M	BLACK	NON HISPANIC OR LATINO	NovaSeq	2021-04-21	no
Sample 444	+	B.1.1.7	16.2657	S	20I/501Y.V1	0.00240932	2777.72	MN	47	M	WHITE	NON HISPANIC OR LATINO	NovaSeq	2021-04-21	no
Sample 445	+	AY.25	26.3889	S	21A (Delta)	0.0474741	653	MN					NextSeq	2021-10-21	unknown
Sample 446	+	B.1.617.2	23.4327	S	21A (Delta)	0.0276347	898.14	CA					NextSeq	2021-08-21	unknown
Sample 447	+	AY.4	25.6394	S	21A (Delta)	0.0449314	2517.78	MN					NovaSeq	2021-10-21	unknown
Sample 448	+	AY.4	22.5511	S	21A (Delta)	0.0112078	1326.7	MN					NextSeq	2021-10-21	unknown
Sample 449	+	P.1	25.6637	S	20J (GAMMA, V3)	0.0536897	604.41	MN	10	F	WHITE	NON HISPANIC OR LATINO	NovaSeq	2021-06-21	no
Sample 450	+	AY.3	24.5441	S	21A (Delta)	0.00638988	1614.09	MN					NovaSeq	2021-10-21	unknown
Sample 451	+	B.1.526	18.0178	S	21F (IOTA)	0.00260931	1768.91	MN	54	M	WHITE	NON HISPANIC OR LATINO	NextSeq	2021-06-21	no
Sample 452	+	AY.3.1	23.9674	S	21A (Delta)	0.0248904	996.41	OH					NovaSeq	2021-09-21	unknown
Sample 453	+	B.1.617.2	18.734	S	21A (Delta)	0.0285045	897.48	MN					NovaSeq	2021-08-21	unknown
Sample 454	+	Could Not Generate	22.2055	S	21A (Delta)	0.0101372	1466.6	MN					NextSeq	2021-09-21	unknown
Sample 455	+	B.1.1.7	25.9688	S	20I/501Y.V1	0.00234239	2349.96	MN	64	F	WHITE	NON HISPANIC OR LATINO	NovaSeq	2021-04-21	no
Sample 456	+	AY.3.1	24.5405	S	21A (Delta)	0.0421211	803.39	MN					NextSeq	2021-09-21	unknown
Sample 457	+	B.1.1.7	15.231	S	20I/501Y.V1	0.00274394	1612.47	MN	13	M	WHITE	NON HISPANIC OR LATINO	NextSeq	2021-05-21	no
Sample 458	+	B.1.617.2	14.6568	S	21A (Delta)	0.00264302	1439.54	MN					NovaSeq	2021-09-21	unknown
Sample 459	+	B.1.617.2	19.7485	S	21A (Delta)	0.0194714	1230.5	MN					NextSeq	2021-10-21	unknown
Sample 460	+	B.1.1.7	20.1661	S	20I/501Y.V1	0.00267702	1229.58	MN	51	M	UNKNOWN	UNKNOWN	NextSeq	2021-04-21	yes
Sample 461	+	B.1.617.2	22.7749	S	21A (Delta)	0.0044831	947.27	MN					NextSeq	2021-09-21	unknown
Sample 462	+	AY.3.1	20.6165	S	21A (Delta)	0.0152894	1755.85	MN					NextSeq	2021-07-21	unknown
Sample 463	+	AY.4	16.2895	S	21A (Delta)	0.00247574	1770.1	MN					NovaSeq	2021-08-21	unknown
Sample 464	+	C.37	22.5276	S	20D	0.00679566	1057.67	MN	44	F	WHITE	DECLINE TO IDENTIFY	NextSeq	2021-05-21	no
Sample 465	+	B.1.526	25.4915	S	21F (IOTA)	0.0024755	1400.16	MN	28	M	ASIAN	NON HISPANIC OR LATINO	NovaSeq	2021-06-21	no
Sample 466	+	B.1.526	24.2278	S	20C	0.00173954	1159.18	NJ	27	M	WHITE	NON HISPANIC OR LATINO	NextSeq	2021-04-21	no
Sample 467	+	AY.7.1	25.3963	S	21A (Delta)	0.0382402	919.19	MN					NextSeq	2021-10-21	unknown
Sample 468	+	B.1.617.2	12.8162	S	21A (Delta)	0.00264382	1652.54	MN					NextSeq	2021-10-21	unknown
Sample 469	+	B.1.1.7	20.7774	S	20I/501Y.V1	0.0277071	778.36	NE	24	M	WHITE	NON HISPANIC OR LATINO	NextSeq	2021-04-21	no
Sample 470	+	B.1.617.2	11.3377	S	21A (Delta)	0.00244229	1956.35	MN					NovaSeq	2021-08-21	unknown
Sample 471	+	B.1.617.2	22.1631	S	21A (Delta)	0.00224448	2896.65	MN					NovaSeq	2021-10-21	unknown
Sample 472	+	B.1.427	12.7378	S	20C	0.000635388	1808.85	WV	15	M	WHITE	UNKNOWN	NextSeq	2021-04-21	no
Sample 473	+	B.1.617.2	12.2845	S	21A (Delta)	0.00230846	3000.13	MN					NovaSeq	2021-10-21	unknown
Sample 474	+	B.1.617.2	25.0332	S	21A (Delta)	0.03272	1139.73	MN					NextSeq	2021-10-21	unknown
Sample 475	+	B.1.1.7	17.2042	S	20I (ALPHA, V1)	0.00244278	1493.57	MN	44	M	ASIAN	NON HISPANIC OR LATINO	NovaSeq	2021-06-21	no
Sample 476	+	B.1.1.7	26.4241	S	20I/501Y.V1	0.0390175	778.89	MN	13	M	DECLINE TO IDENTIFY	HISPANIC OR LATINO	NextSeq	2021-05-21	no
Sample 477	+	B.1.617.2	21.5432	S	21A (Delta)	0.0162262	2107.29	MN					NovaSeq	2021-10-21	unknown
Sample 478	+	B.1.1.7	25.4775	S	20I/501Y.V1	0.02222	743.63	NM	72	F	WHITE	HISPANIC OR LATINO	NextSeq	2021-05-21	no
Sample 479	+	AY.44	14.8496	S	21A (Delta)	0.00240883	1817.93	MN					NextSeq	2021-10-21	unknown
Sample 480	+	B.1.617.2	19.1125	S	21A (Delta)	0.0072265	1218.12	MN					NextSeq	2021-09-21	unknown
Sample 481	+	AY.4	16.4604	S	21A (Delta)	0.0113416	1635.09	MN					NextSeq	2021-10-21	unknown
Sample 482	+	B.1.1.7	25.2256	S	20I/501Y.V1	0.00284433	1244.47	NJ	30	F	OTHER	HISPANIC OR LATINO	NextSeq	2021-04-21	no
Sample 483	+	Could Not Generate	25.733	S	21A (Delta)	0.251421	382.44	MN					NextSeq	2021-10-21	unknown
Sample 484	+	B.1.1.7	27.3492	S	20I/501Y.V1	0.0825191	627.67	MN	25	M	WHITE	NON HISPANIC OR LATINO	NextSeq	2021-04-21	no
Sample 485	+	B.1.1.7	20.2491	S	20I/501Y.V1	0.00113808	2836.51	NA		NA	NO INFORMATION	NO INFORMATION	NovaSeq	2021-04-21	no
Sample 486	+	B.1.1.335	28.1624	S	20G	0.406819	543.64	MN	34	M	BLACK	NON HISPANIC OR LATINO	NextSeq	2021-04-21	no
Sample 487	+	AY.4	18.9204	S	21A (Delta)	0.00247574	2166.46	MN					NovaSeq	2021-10-21	unknown
Sample 488	+	B.1.1.7	20.2851	S	20I/501Y.V1	0.00167314	1310.86	MN	14	F	WHITE	NON HISPANIC OR LATINO	NextSeq	2021-04-21	no
Sample 489	+	B.1.617.2	16.8105	S	21A (Delta)	0.00829709	1327.51	MN					NextSeq	2021-09-21	unknown
Sample 490	+	B.1.429	23.7818	S	20C	0.0151824	742.74	MN	35	M	WHITE	UNKNOWN	NextSeq	2021-04-21	no
Sample 491	+	B.1.617.2	21.6489	S	21A (Delta)	0.0072265	1151.28	MN					NextSeq	2021-10-21	unknown
Sample 492	+	AY.25	21.7714	S	21A (Delta)	0.00642355	2784.32	MN					NovaSeq	2021-10-21	unknown
Sample 493	+	AY.34	25.9076	S	21A (Delta)	0.068819	1038.41	MN					NovaSeq	2021-10-21	unknown
Sample 494	+	AY.3	20.4835	S	21A (Delta)	0.00849783	1771.08	MN					NovaSeq	2021-10-21	unknown
Sample 495	+	AY.3	18.6531	S	21A (Delta)	0.00806371	1657.85	MN					NextSeq	2021-10-21	unknown
Sample 496	+	Could Not Generate	28.7523	S	19A	0.804066	171.57	KY	43	M	BLACK	NON HISPANIC OR LATINO	NextSeq	2021-04-21	no
Sample 497	+	AY.5	27.9732	S	21A (Delta)	0.24602	1132.17	MN					NovaSeq	2021-09-21	unknown
Sample 498	+	AY.3.1	16.9919	S	21A (Delta)	0.00685848	1877.34	MN					NextSeq	2021-10-21	unknown
Sample 499	+	B.1.1.7	23.5307	S	20I/501Y.V1	0.00495248	954.73	WV	39	M	WHITE	NON HISPANIC OR LATINO	NextSeq	2021-05-21	no
Sample 500	+	B.1.1.7	26.2645	S	20I/501Y.V1	0.0440542	661.23	NC	14	M	WHITE	NON HISPANIC OR LATINO	NextSeq	2021-04-21	no
Sample 501	+	B.1.1.7	15.6379	S	20I/501Y.V1	0.00120466	3182.2	TX	31	F	WHITE	NON HISPANIC OR LATINO	NovaSeq	2021-04-21	no
Sample 502	+	B.1.1.7	17.232	S	20I/501Y.V1	0.0025097	1660.85	MN	21	M	WHITE	NON HISPANIC OR LATINO	NextSeq	2021-05-21	no
Sample 503	+	AY.3	28.7381	S	21A (Delta)	0.213172	266.78						NovaSeq	2021-08-21	unknown
Sample 504	+	AY.10	26.2934	S	21A (Delta)	0.0704583	501.95	MD	47	female		Not Hispanic or Latino	NextSeq	2021-10-21	unknown
Sample 505	+	B.1.1.7	23.2074	S	20I/501Y.V1	0.059731	1152.58	NJ	33	M	BLACK	NON HISPANIC OR LATINO	NextSeq	2021-05-21	unknown
Sample 506	+	B.1.617.2	18.8233	S	21A (Delta)	0.0158247	1424.25	MN					NextSeq	2021-09-21	unknown
Sample 507	+	B.1.1.7	17.9201	S	20I/501Y.V1	0.00271048	1312.62	NA		NA	NO INFORMATION	NO INFORMATION	NextSeq	2021-05-21	no
Sample 508	+	B.1.1.7	24.7483	S	20I/501Y.V1	0.0121829	2282.48	MN	21	M	WHITE	DECLINE TO IDENTIFY	NovaSeq	2021-04-21	no
Sample 509	+	B.1.617.2	18.8498	S	21A (Delta)	0.00225104	1768.32	NM					NovaSeq	2021-08-21	unknown
Sample 510	+	AY.25	25.5891	S	21A (Delta)	0.0394781	595.99	MN					NovaSeq	2021-09-21	unknown
Sample 511	+	B.1.1.7	14.666	S	20I/501Y.V1	0.00267702	1464.02	PA	30	M	WHITE	NON HISPANIC OR LATINO	NextSeq	2021-05-21	no
Sample 512	+	B.1.617.2	25.0704	S	21A (Delta)	0.0192707	1199.53	CA					NextSeq	2021-10-21	unknown
Sample 513	+	B.1.617.2	17.2428	S	21A (Delta)	0.00695885	2815.74	NY					NovaSeq	2021-07-21	unknown
Sample 514	+	AY.24	20.5127	S	21A (Delta)	0.0111908	1254.42	MN					NextSeq	2021-10-21	unknown
Sample 515	+	B.1.1.7	23.2645	S	20I/501Y.V1	0.0102396	972.25	MN	20	M	ASIAN	DECLINE TO IDENTIFY	NextSeq	2021-04-21	no
Sample 516	+	B.1.429	21.7856	S	20C	0.00244098	2652.66	NA		NA	NO INFORMATION	NO INFORMATION	NovaSeq	2021-04-21	no
Sample 517	+	Could Not Generate	24.3086	S	21A (Delta)	0.00224155	1826.47	WY					NovaSeq	2021-09-21	unknown
Sample 518	+	B.1.1.7	22.6853	S	20I (ALPHA, V1)	0.00327935	1380.62	MN	26	F	WHITE	NON HISPANIC OR LATINO	NovaSeq	2021-06-21	no
Sample 519	+	B.1.1.7	21.8575	S	20I/501Y.V1	0.0025097	2835.24	MN	43	F	WHITE	NON HISPANIC OR LATINO	NovaSeq	2021-04-21	no
Sample 520	+	AY.23	18.3523	S	21A (Delta)	0.308029	1462.44	MN					NovaSeq	2021-09-21	unknown
Sample 521	+	B.1.617.2	23.4157	S	21A (Delta)	0.00769437	2265.16	MN					NovaSeq	2021-10-21	unknown
Sample 522	+	B.1.617.2	23.5131	S	21A (Delta)	0.00926731	1335.05	MN					NextSeq	2021-10-21	unknown
Sample 523	+	B.1.617.2	27.0306	S	21A (Delta)	0.00856474	1682.89	MN					NovaSeq	2021-10-21	unknown
Sample 524	+	AY.5.2	27.1756	S	21A (Delta)	0.16263	377.77	MN					NextSeq	2021-10-21	unknown
Sample 525	+	Could Not Generate	29.9487	S	21A (Delta)	0.266314	254.67						NovaSeq	2021-09-21	unknown
Sample 526	+	AY.4	16.9149	S	21A (Delta)	0.0043823	1493.41	MN					NextSeq	2021-09-21	unknown
Sample 527	+	B.1.1.7	24.1431	S	20I/501Y.V1	0.0247959	959.22	VA		NA	NO INFORMATION	NO INFORMATION	NextSeq	2021-05-21	no
Sample 528	+	AY.4	22.5305	S	21A (Delta)	0.0120107	1258.89	MN					NextSeq	2021-09-21	unknown
Sample 529	+	B.1	27.6857	S	21A (Delta)	0.463822	217.07	MN					NovaSeq	2021-10-21	unknown
Sample 530	-	Sample Not Detected	28.5731	S				MN					NextSeq	2021-10-21	unknown
Sample 531	+	AY.3	14.949	S	21A (Delta)	0.0138838	1786.08	MN					NextSeq	2021-10-21	unknown
Sample 532	+	AY.43	27.699	S	21A (Delta)	0.394007	561.04	MN					NextSeq	2021-10-21	unknown
Sample 533	+	B.1.617.2	14.8457	S	21A (Delta)	0.0147206	1202.1	MN					NextSeq	2021-10-21	unknown
Sample 534	+	B.1.1.318	25.4589	S	20B	0.00274495	2192.94	MN	18	F	BLACK	NON HISPANIC OR LATINO	NovaSeq	2021-05-21	yes
Sample 535	+	B.1.617.2	22.6998	S	21A (Delta)	0.022081	1164.55	ID					NextSeq	2021-10-21	unknown
Sample 536	+	B.1.1.7	13.5259	S	20I/501Y.V1	0.00244278	2160.26	MN	62	M	WHITE	DECLINE TO IDENTIFY	NovaSeq	2021-05-21	yes
Sample 537	+	AY.25	28.1396	S	21A (Delta)	0.122072	405.29	MA	28	Female	White	Not Hispanic or Latino	NextSeq	2021-09-21	unknown
Sample 538	+	AY.4	13.5462	S	21A (Delta)	0.00267648	1457.27	ID					NextSeq	2021-09-21	unknown
Sample 539	+	AY.4	26.3785	S	21A (Delta)	0.0587153	557.58	MN					NovaSeq	2021-09-21	unknown
Sample 540	+	AY.25	26.7732	S	21A (Delta)	0.0949147	590.6	NM					NextSeq	2021-09-21	unknown
Sample 541	+	B.1.526	22.0781	S	20C	0.00963436	2915.09	MN	57	M	WHITE	NON HISPANIC OR LATINO	NovaSeq	2021-05-21	no
Sample 542	+	B.1.617.2	22.5313	S	21A (Delta)	0.00267648	1523.6						NextSeq	2021-09-21	unknown
Sample 543	+	AY.3	20.504	S	21A (Delta)	0.330168	1428.92	MN					NovaSeq	2021-08-21	unknown
Sample 544	+	B.1.1.7	20.6051	S	20I/501Y.V1	0.000870031	1241.1	MI	42	M	OTHER	UNKNOWN	NextSeq	2021-04-21	no
Sample 545	+	AY.43	23.4716	S	21A (Delta)	0.0107059	1587.8	NJ					NextSeq	2021-10-21	unknown
Sample 546	+	AY.4	12.6641	S	21A (Delta)	0.00244229	2594.73	MN					NextSeq	2021-10-21	unknown
Sample 547	+	B.1.617.2	19.1119	S	21A (Delta)	0.012914	2997.63	MN					NovaSeq	2021-10-21	unknown
Sample 548	+	B.1.1.7	19.4496	S	20I/501Y.V1	0.00107081	2523.25	MN	38	F	WHITE	NON HISPANIC OR LATINO	NovaSeq	2021-04-21	no
Sample 549	+	Could Not Generate	24.7985	S	21A (Delta)	0.0810974	434.17	MN					NextSeq	2021-10-21	unknown
Sample 550	+	B.1.617.2	20.7342	S	21A (Delta)	0.0134828	1049.01	MN					NovaSeq	2021-09-21	unknown
Sample 551	+	AY.39	26.8537	S	21A (Delta)	0.0388759	701.39						NovaSeq	2021-10-21	unknown
Sample 552	+	B.1.1.7	23.5044	S	20I/501Y.V1	0.00254317	1581.9	MN	29	F	WHITE	NON HISPANIC OR LATINO	NovaSeq	2021-04-21	no
Sample 553	+	AY.12	25.3937	S	21A (Delta)	0.0587487	654.38	MN					NovaSeq	2021-08-21	unknown
Sample 554	+	AY.20	23.4044	S	21A (Delta)	0.030226	753.46	MN					NextSeq	2021-10-21	unknown
Sample 555	+	B.1.1.7	18.1291	S	20I/501Y.V1	0.00274394	1484.66	MN	9	M	OTHER	HISPANIC OR LATINO	NextSeq	2021-05-21	no
Sample 556	+	B.1.617.2	20.3038	S	21A (Delta)	0.00859819	1587.41	MN					NextSeq	2021-10-21	unknown
Sample 557	+	AY.4	14.8327	S	21A (Delta)	0.00946805	1411.63	MN					NovaSeq	2021-09-21	unknown
Sample 558	+	B.1.466.1	20.1334	S	20A	0.000568695	2986.97	NJ	64	M	WHITE	DECLINE TO IDENTIFY	NovaSeq	2021-04-21	no
Sample 559	+	B.1.617.2	16.2295	S	21A (Delta)	0.00936768	1575.52	MN					NextSeq	2021-09-21	unknown
Sample 560	+	AY.24	25.2888	S	21A (Delta)	0.0242076	1313.86	SD					NovaSeq	2021-09-21	unknown
Sample 561	+	Could Not Generate	27.3801	S	21A (Delta)	0.0442288	781.79	MN					NextSeq	2021-09-21	unknown
Sample 562	+	AY.4	21.1426	S	21A (Delta)	0.0137504	1289.76	MN					NovaSeq	2021-09-21	unknown
Sample 563	+	B.1.1.7	26.2314	S	20I/501Y.V1	0.151373	415.65	NA		NA	NO INFORMATION	NO INFORMATION	NextSeq	2021-04-21	no
Sample 564	+	AY.39	26.0352	S	21A (Delta)	0.0300629	910.44	MN					NovaSeq	2021-10-21	unknown
Sample 565	+	B.1.617.2	25.8747	S	21A (Delta)	0.0242556	1102.56	MN					NextSeq	2021-09-21	unknown
Sample 566	+	AY.4	15.1867	S	21A (Delta)	0.00562061	1837.63	MN					NextSeq	2021-08-21	unknown
Sample 567	+	Could Not Generate	22.9221	S	19A	0.60182	195.4						NextSeq	2021-10-21	unknown
Sample 568	+	AY.3	23.8426	S	21A (Delta)	0.0107394	1741.76	OR					NovaSeq	2021-09-21	unknown
Sample 569	+	B.1.1.7	15.678	S	20I/501Y.V1	0.00274394	943.38	MN	27	M	UNKNOWN	NON HISPANIC OR LATINO	NextSeq	2021-05-21	no
Sample 570	+	B.1.427	23.5257	S	20C	0.0357155	946.96	MN	51	F	WHITE	NON HISPANIC OR LATINO	NextSeq	2021-05-21	no
Sample 571	+	AY.26	17.4353	S	21A (Delta)	0.00234388	3184.32	PA					NovaSeq	2021-10-21	unknown
Sample 572	+	B.1.617.2	22.881	S	21A (Delta)	0.0171964	1081.14	MN					NextSeq	2021-09-21	unknown
Sample 573	+	AY.13	27.8837	S	21A (Delta)	0.0917698	408.13	MN					NovaSeq	2021-09-21	unknown
Sample 574	+	B.1.526	19.6573	S	20C	0.00147192	1427.92	NA		NA	NO INFORMATION	NO INFORMATION	NextSeq	2021-04-21	no
Sample 575	+	AY.24	27.7907	S	21A (Delta)	0.188458	231.48	MN					NovaSeq	2021-08-21	unknown
Sample 576	+	B.1.1.7	21.9453	S	20I/501Y.V1	0.00230893	2540.3	MN	52	M	WHITE	NON HISPANIC OR LATINO	NovaSeq	2021-05-21	no
Sample 577	+	AY.3	18.5789	S	21A (Delta)	0.0289729	1398.83	MN					NextSeq	2021-09-21	unknown
Sample 578	+	B.1.1.7	21.91	S	20I/501Y.V1	0.0526034	1059.61	MN	15	M	WHITE	NON HISPANIC OR LATINO	NextSeq	2021-05-21	no
Sample 579	+	AY.4	20.7473	S	21A (Delta)	0.00648699	1506.74	MN					NextSeq	2021-10-21	unknown
Sample 580	+	B.1.1.7	24.6867	S	20I/501Y.V1	0.00575559	1565.25	MN	14	M	OTHER	HISPANIC OR LATINO	NovaSeq	2021-05-21	no
Sample 581	+	B.1.1.7	16.7441	S	20I/501Y.V1	0.00240932	2912.9	MN	39	M	WHITE	NON HISPANIC OR LATINO	NovaSeq	2021-05-21	no
Sample 582	+	B.1.1.7	25.9756	S	20I/501Y.V1	0.0131843	997.61	MN	58	F	WHITE	HISPANIC OR LATINO	NextSeq	2021-05-21	yes
Sample 583	-	Sample Not Detected	28.7117	S				MN	40	F	WHITE	UNKNOWN	NovaSeq	2021-06-21	no
Sample 584	+	AY.25	18.1072	S	21A (Delta)	0.011442	1305.04						NextSeq	2021-10-21	unknown
Sample 585	+	B.1.1.7	23.9756	S	20I/501Y.V1	0.024227	709.18	MN	20	F	ASIAN	NON HISPANIC OR LATINO	NextSeq	2021-04-21	no
Sample 586	+	B.1.1.7	25.7674	S	20I/501Y.V1	0.0660889	885.02	MN	2	M	WHITE	NON HISPANIC OR LATINO	NextSeq	2021-04-21	no
Sample 587	+	AY.3	29.4435	S	21A (Delta)	0.233668	453.49						NovaSeq	2021-08-21	unknown
Sample 588	+	B.1.1.7	13.2529	S	20I/501Y.V1	0.000334627	2894.88	MN	59	F	WHITE	NON HISPANIC OR LATINO	NovaSeq	2021-04-21	no
Sample 589	+	B.1.2	25.7668	S	20G	0.0184597	2138.15	NA		NA	NO INFORMATION	NO INFORMATION	NovaSeq	2021-04-21	no
Sample 590	+	B.1.526	24.8145	S	20C	0.0191349	772.76	NA		NA	NO INFORMATION	NO INFORMATION	NextSeq	2021-04-21	no
Sample 591	+	Could Not Generate	15.5536	S	21A (Delta)	0.00267648	1640.28	MN					NextSeq	2021-09-21	unknown
Sample 592	+	B.1.617.2	19.6337	S	21A (Delta)	0.0105721	1376.91	ID					NextSeq	2021-10-21	unknown
Sample 593	+	B.1.1.7	18.1261	S	20I/501Y.V1	0.0319569	912.79	MN	49	M	WHITE	DECLINE TO IDENTIFY	NextSeq	2021-05-21	no
Sample 594	+	B.1.617.2	28.2159	S	21A (Delta)	0.0264637	907.5	MN					NovaSeq	2021-09-21	unknown
Sample 595	+	B.1.1.7	27.0521	S	20I/501Y.V1	0.0274394	694.05	MN	41	F	WHITE	UNKNOWN	NextSeq	2021-04-21	no
Sample 596	+	B.1.617.2	19.7636	S	21A (Delta)	0.00986952	891.89	MN					NovaSeq	2021-09-21	unknown
Sample 597	+	Could Not Generate	27.7855	S	21A (Delta)	0.0732874	637.91	MN					NextSeq	2021-09-21	unknown
Sample 598	+	AY.25	13.2011	S	21A (Delta)	0.00240932	3017.46	NM					NovaSeq	2021-10-21	unknown
Sample 599	+	AY.23	21.4773	S	21A (Delta)	0.0206758	1339.2	MN					NovaSeq	2021-10-21	unknown
Sample 600	+	B.1.617.2	20.9333	S	21A (Delta)	0.0221144	863.04	MN					NovaSeq	2021-10-21	unknown
Sample 601	+	B.1.1.7	20.4874	S	20I/501Y.V1	0.00291126	884.71	MN	64	M	WHITE	NON HISPANIC OR LATINO	NextSeq	2021-04-21	no
Sample 602	+	B.1.1.7	25.81	S	20I/501Y.V1	0.0312542	785.8	MN	14	F	WHITE	DECLINE TO IDENTIFY	NextSeq	2021-04-21	no
Sample 603	+	Could Not Generate	19.7047	S	20C	0.562686	315.1	MN	39	U	DECLINE TO IDENTIFY	DECLINE TO IDENTIFY	NextSeq	2021-04-21	no
Sample 604	+	AY.3	20.8256	S	21A (Delta)	0.00779525	1824.57	MN					NextSeq	2021-10-21	unknown
Sample 605	+	AY.39	25.1917	S	21A (Delta)	0.0358648	1064	MN					NextSeq	2021-10-21	unknown
Sample 606	+	B.1.617.2	26.9697	S	21A (Delta)	0.0246236	2914.65						NovaSeq	2021-10-21	unknown
Sample 607	+	B.1.1.7	24.9515	S	20I/501Y.V1	0.104841	540.1	MN	18	F	BLACK	NON HISPANIC OR LATINO	NextSeq	2021-04-21	no
Sample 608	+	AY.3	21.7805	S	21A (Delta)	0.00809635	1631.84	MN					NovaSeq	2021-10-21	unknown
Sample 609	+	B.1.617.2	12.3572	S	21A (Delta)	0.00244229	1594.37	MN					NextSeq	2021-09-21	unknown
Sample 610	+	AY.4	17.9547	S	21A (Delta)	0.0133155	1566.16	NJ					NextSeq	2021-10-21	unknown
Sample 611	+	B.1.617.2	14.2211	S	21A (Delta)	0.00843091	1511.23	MN					NextSeq	2021-09-21	unknown
Sample 612	+	Could Not Generate	29.8028	S	21A (Delta)	0.242675	515.7	MN					NextSeq	2021-10-21	unknown
Sample 613	+	AY.3	26.5239	S	21A (Delta)	0.0344193	595.07	GA					NextSeq	2021-08-21	unknown
Sample 614	+	AY.4	21.9031	S	21A (Delta)	0.0197043	920.65	CA					NextSeq	2021-10-21	unknown
Sample 615	+	Could Not Generate	25.2295	S	21A (Delta)	0.0216126	841.74						NextSeq	2021-09-21	unknown
Sample 616	+	AY.25	22.2821	S	21A (Delta)	0.00247516	1611.28	MN					NextSeq	2021-10-21	unknown
Sample 617	+	AY.4	22.1353	S	21A (Delta)	0.00953496	1422.76	ID					NextSeq	2021-10-21	unknown
Sample 618	+	AY.3	26.1703	S	21A (Delta)	0.0276012	1373.19	SD					NovaSeq	2021-10-21	unknown
Sample 619	+	B.1.617.2	18.6006	S	21A (Delta)	0.0097357	1665.19	MN					NovaSeq	2021-08-21	unknown
Sample 620	+	AY.12	26.3671	S	21A (Delta)	0.0468907	795.99	MN					NextSeq	2021-08-21	unknown
Sample 621	+	B.1.1.7	26.2069	S	20I/501Y.V1	0.0560835	539.23	MN	16	M	WHITE	DECLINE TO IDENTIFY	NextSeq	2021-05-21	no
Sample 622	+	B.1.617.2	22.3016	S	21A (Delta)	0.125343	809.91						NovaSeq	2021-09-21	unknown
Sample 623	+	AY.25	22.965	S	21A (Delta)	0.032981	1019.35	MN					NextSeq	2021-09-21	unknown
Sample 624	+	B.1.617.2	27.9128	S	21A (Delta)	0.182733	388.51						NextSeq	2021-09-21	unknown
Sample 625	+	B.1.617.2	19.7726	S	21A (Delta)	0.0139818	1569.44	NM					NextSeq	2021-10-21	unknown
Sample 626	+	B.1.1.7	23.3466	S	20I/501Y.V1	0.004484	1177.04	MN	34	M	WHITE	NON HISPANIC OR LATINO	NextSeq	2021-05-21	no
Sample 627	+	AY.25	23.3125	S	21A (Delta)	0.0255269	950.08	WY					NextSeq	2021-10-21	unknown
Sample 628	+	B.1.617.2	27.29	S	21A (Delta)	0.068083	446.27	MN					NovaSeq	2021-08-21	unknown
Sample 629	+	AY.26	14.8954	S	21A (Delta)	0.00244229	1570.47	MN					NovaSeq	2021-09-21	unknown
Sample 630	+	B.1.1.7	21.6372	S	20I/501Y.V1	0.00291262	1281.31	MN	45	M	ASIAN	NON HISPANIC OR LATINO	NextSeq	2021-05-21	no
Sample 631	+	B.1.526	18.5177	S	20C	0.0018758	1414.57	PA	22	M	BLACK	NO INFORMATION	NextSeq	2021-04-21	no
Sample 632	+	AY.26	21.8814	S	21A (Delta)	0.00267675	1612.56	MN					NextSeq	2021-10-21	unknown
Sample 633	+	B.1.1.7	16.5069	S	20I/501Y.V1	0.0101392	1150.17	MN	53	U	DECLINE TO IDENTIFY	DECLINE TO IDENTIFY	NextSeq	2021-05-21	no
Sample 634	+	Could Not Generate	25.0186	S	20A	0.534243	219.65	MN					NextSeq	2021-10-21	unknown
Sample 635	-	Sample Not Detected	23.8138	S				MN					NextSeq	2021-10-21	unknown
Sample 636	+	AY.25	22.1004	S	21A (Delta)	0.0033456	1339.45	NJ					NextSeq	2021-09-21	unknown
Sample 637	+	B.1.1.7	23.4774	S	20I/501Y.V1	0.0780685	1072.48	PA	19	F	WHITE	NON HISPANIC OR LATINO	NextSeq	2021-05-21	no
Sample 638	+	AY.25	18.1874	S	21A (Delta)	0.0189361	1542.89	NM					NextSeq	2021-10-21	unknown
Sample 639	+	AY.25	18.0508	S	21A (Delta)	0.0122114	1373.86	MN					NextSeq	2021-10-21	unknown
Sample 640	+	AY.25	26.8672	S	21A (Delta)	0.0566076	1111.96	GA					NextSeq	2021-09-21	unknown
Sample 641	+	B.1.617.2	19.7367	S	21A (Delta)	0.00809635	2275.52	MN					NovaSeq	2021-10-21	unknown
Sample 642	+	Could Not Generate	28.5328	S	20A	0.575025	361.41						NovaSeq	2021-09-21	unknown
Sample 643	+	B.1.429	25.0602	S	20C	0.00143798	2776.73	MN	40	F	WHITE	NON HISPANIC OR LATINO	NovaSeq	2021-04-21	no
Sample 644	+	B.1.1.7	22.3924	S	20I/501Y.V1	0.00107081	2355.03	MN	7	M	WHITE	UNKNOWN	NovaSeq	2021-04-21	no
Sample 645	+	B.1.1.7	21.2665	S	20I/501Y.V1	0.00167314	1295.77	NA		NA	NO INFORMATION	NO INFORMATION	NextSeq	2021-04-21	no
Sample 646	+	AY.25	26.8654	S	21A (Delta)	0.0405487	809.16	MN					NextSeq	2021-10-21	unknown
Sample 647	-	Sample Not Detected	26.3262	S				MN					NextSeq	2021-10-21	unknown
Sample 648	+	AY.4	27.4753	S	21A (Delta)	0.042991	928.01	ID					NextSeq	2021-10-21	unknown
Sample 649	+	AY.4	20.9987	S	21A (Delta)	0.00264302	2092.33	MN					NovaSeq	2021-10-21	unknown
Sample 650	+	B.1.617.2	24.685	S	21A (Delta)	0.0694282	473.61	SD					NovaSeq	2021-08-21	unknown
Sample 651	+	B.1.2	28.0448	S	20G	0.0336756	1877.13	MN	7	F	WHITE	DECLINE TO IDENTIFY	NovaSeq	2021-04-21	no
Sample 652	+	B.1.617.2	21.8861	S	21A (Delta)	0.0038809	1145.26	MN					NovaSeq	2021-08-21	unknown
Sample 653	+	B.1.1.7	17.0744	S	20I/501Y.V1	0.000836568	1277.35	MN	48	M	WHITE	NON HISPANIC OR LATINO	NextSeq	2021-04-21	no
Sample 654	+	B.1.1.7	21.7488	S	20I/501Y.V1	0.0014389	2381.22	MN	18	M	WHITE	NON HISPANIC OR LATINO	NovaSeq	2021-04-21	yes
Sample 655	+	B.1.617.2	21.1182	S	21A (Delta)	0.0332553	1336.1	MN					NextSeq	2021-09-21	unknown
Sample 656	+	AY.25	15.431	S	21A (Delta)	0.00240883	3160.58	MN					NovaSeq	2021-10-21	unknown
Sample 657	+	B.1.1.7	17.8702	S	20I/501Y.V1	0.00230893	3334.63	NA		NA	NO INFORMATION	NO INFORMATION	NovaSeq	2021-04-21	no
Sample 658	+	B.1.1.7	18.5279	S	20I/501Y.V1	0.0014389	2762.51	MN	40	M	BLACK	NON HISPANIC OR LATINO	NovaSeq	2021-04-21	no
Sample 659	+	AY.4	11.7419	S	21A (Delta)	0.010639	1400.3	MN					NovaSeq	2021-09-21	unknown
Sample 660	+	B.1.1.7	16.4434	S	20I/501Y.V1	0.00153929	1445.79	NA		NA	NO INFORMATION	NO INFORMATION	NextSeq	2021-04-21	no
Sample 661	+	B.1	23.8617	S	20C	0.00163863	887.33	MN	29	F	WHITE	NON HISPANIC OR LATINO	NextSeq	2021-04-21	no
Sample 662	+	B.1.1.7	20.3657	S	20I/501Y.V1	0.00150582	1204.23	MN	32	F	DECLINE TO IDENTIFY	HISPANIC OR LATINO	NextSeq	2021-04-21	no
Sample 663	+	AY.25	17.3438	S	21A (Delta)	0.118434	1121.85						NextSeq	2021-09-21	unknown
Sample 664	+	B.1.1.7	25.9719	S	20I/501Y.V1	0.0110427	724.36	MN	18	F	WHITE	DECLINE TO IDENTIFY	NextSeq	2021-04-21	no
Sample 665	+	AY.4	14.5472	S	21A (Delta)	0.00528605	1872.88	MN					NextSeq	2021-10-21	unknown
Sample 666	+	Could Not Generate	28.6095	S	20A	0.58786	333.43	MN					NextSeq	2021-09-21	unknown
Sample 667	+	AY.12	19.7291	S	21A (Delta)	0.0113416	1613.1	MN					NovaSeq	2021-09-21	unknown
Sample 668	+	AY.12	24.9166	S	21A (Delta)	0.0344885	778.59	ID					NextSeq	2021-08-21	unknown
Sample 669	+	AY.24	20.6167	S	21A (Delta)	0.0233881	1115.66	MN					NextSeq	2021-10-21	unknown
Sample 670	+	B.1.617.2	20.8941	S	21A (Delta)	0.0180997	1484.93	MN					NextSeq	2021-10-21	unknown
Sample 671	+	B.1.1.7	22.3877	S	20I/501Y.V1	0.0106411	856.36	MN	26	F	BLACK	NON HISPANIC OR LATINO	NextSeq	2021-05-21	no
Sample 672	+	B.1.1.7	17.0515	S	20I/501Y.V1	0.00244278	1440.8	MN	29	M	WHITE	NON HISPANIC OR LATINO	NextSeq	2021-04-21	no
Sample 673	+	B.1.617.2	21.4396	S	21A (Delta)	0.00324523	1387.35	MN					NovaSeq	2021-08-21	unknown
Sample 674	+	B.1.1.7	23.7245	S	20I/501Y.V1	0.167297	655.95	MN	30	M	WHITE	NON HISPANIC OR LATINO	NextSeq	2021-05-21	no
Sample 675	+	B.1.1.7	19.0671	S	20I/501Y.V1	0.00227547	2390.94	MN	62	M	WHITE	NON HISPANIC OR LATINO	NovaSeq	2021-05-21	yes
Sample 676	+	Could Not Generate	19.8695	S	21A (Delta)	0.014085	2206.16	MN					NovaSeq	2021-09-21	unknown
Sample 677	+	Could Not Generate	22.301	S	21A (Delta)	0.0143192	2282.2	WY					NovaSeq	2021-09-21	unknown
Sample 678	+	B.1.1.7	22.6538	S	20I/501Y.V1	0.00180699	1272.5	NA		NA	NO INFORMATION	NO INFORMATION	NextSeq	2021-04-21	no
Sample 679	+	AY.4	25.6382	S	21A (Delta)	0.0686183	379.7	MN					NextSeq	2021-09-21	unknown
Sample 680	+	AY.3	22.463	S	21A (Delta)	0.0500836	706.17	MN					NovaSeq	2021-08-21	unknown
Sample 681	+	B.1.617.2	23.0073	S	21A (Delta)	0.185366	1547.81	MN					NovaSeq	2021-10-21	unknown
Sample 682	+	AY.29	16.53	S	21A (Delta)	0.00254266	1633.59	MN					NextSeq	2021-10-21	unknown
Sample 683	+	B.1.1.7	21.2294	S	20I/501Y.V1	0.00267702	1355.77	MN	42	M	WHITE	NON HISPANIC OR LATINO	NextSeq	2021-05-21	no
Sample 684	+	AY.12	23.4161	S	21A (Delta)	0.0674003	449.02	MN					NovaSeq	2021-08-21	unknown
Sample 685	+	B.1.1.519	18.5665	S	20B	0.00244123	2637.83	MN	37	F	WHITE	NON HISPANIC OR LATINO	NovaSeq	2021-05-21	no
Sample 686	+	B.1.526	21.0957	S	20C	0.0493092	1128.19	NA		NA	NO INFORMATION	NO INFORMATION	NextSeq	2021-04-21	no
Sample 687	+	AY.39	26.0725	S	21A (Delta)	0.0216482	937.32	MN					NextSeq	2021-10-21	unknown
Sample 688	+	AY.4	15.7966	S	21A (Delta)	0.0269321	855.35	ID					NextSeq	2021-10-21	unknown
Sample 689	+	Could Not Generate	25.2535	S	20I/501Y.V1	0.667703	230.5	MN	14	U	WHITE	NON HISPANIC OR LATINO	NextSeq	2021-05-21	no
Sample 690	+	AY.25	21.6928	S	21A (Delta)	0.0869522	523.27	MN					NextSeq	2021-10-21	unknown
Sample 691	+	AY.25	27.4314	S	21A (Delta)	0.220881	329.41	MN					NextSeq	2021-10-21	unknown
Sample 692	+	B.1.617.2	23.5072	S	21A (Delta)	0.0129809	1372.51	MN					NextSeq	2021-10-21	unknown
Sample 693	+	AY.25	18.8997	S	21A (Delta)	0.0109067	1596.96	MN					NextSeq	2021-10-21	unknown
Sample 694	+	B.1.617.2	16.9124	S	21A (Delta)	0.0109401	1635.84	MN					NextSeq	2021-10-21	unknown
Sample 695	+	AY.3	24.6276	S	21A (Delta)	0.0799452	510.09	MN					NextSeq	2021-10-21	unknown
Sample 696	+	B.1.1.7	29.6262	S	20I/501Y.V1	0.181311	1031.78	MN	43	M	WHITE	NON HISPANIC OR LATINO	NovaSeq	2021-04-21	no
Sample 697	+	AY.24	25.0449	S	21A (Delta)	0.0436266	621.4	MN					NextSeq	2021-10-21	unknown
Sample 698	+	AY.4	17.9875	S	21A (Delta)	0.023921	832.55	MN					NextSeq	2021-10-21	unknown
Sample 699	+	Could Not Generate	21.1523	S	21A (Delta)	0.572351	312.21	MN					NextSeq	2021-10-21	unknown
Sample 700	+	AY.25	28.4497	S	21A (Delta)	0.0416527	814.94	MN					NextSeq	2021-10-21	unknown
Sample 701	+	B.1.1.7	21.7726	S	20I/501Y.V1	0.000702717	2620.2	MN	33	F	OTHER	UNKNOWN	NovaSeq	2021-04-21	no
Sample 702	+	AY.4	16.0274	S	21A (Delta)	0.018267	1176.95	NJ					NovaSeq	2021-08-21	unknown
Sample 703	+	AY.4	24.8184	S	21A (Delta)	0.0128471	2444.77	NM					NovaSeq	2021-10-21	unknown
Sample 704	+	B.1.617.2	27.3783	S	21A (Delta)	0.0540315	730.55	MN					NextSeq	2021-10-21	unknown
Sample 705	+	B.1.617.2	25.0713	S	21A (Delta)	0.0885513	414.07	NJ					NovaSeq	2021-10-21	unknown
Sample 706	+	AY.4	13.3243	S	21A (Delta)	0.163061	1651.63	MN					NovaSeq	2021-09-21	unknown
Sample 707	+	B.1.1.7	25.8308	S	20I/501Y.V1	0.199177	855.35	UT	22	F	WHITE	NON HISPANIC OR LATINO	NovaSeq	2021-05-21	no
Sample 708	+	B.1.617.2	21.0849	S	21A (Delta)	0.156643	397.94	MN					NextSeq	2021-10-21	unknown
Sample 709	+	AY.3	24.6228	S	21A (Delta)	0.0317163	1154.44	MN					NextSeq	2021-09-21	unknown
Sample 710	+	B.1.1.7	22.6211	S	20I/501Y.V1	0.0464431	2638.22	MN	18	F	WHITE	NON HISPANIC OR LATINO	NextSeq	2021-05-21	no
Sample 711	+	B.1.1.7	22.9462	S	20I (ALPHA, V1)	0.00257663	1537.71	MN	23	F	BLACK	NON HISPANIC OR LATINO	NovaSeq	2021-06-21	no
Sample 712	+	AY.12	28.828	S	21A (Delta)	0.0766323	385.78	ID					NextSeq	2021-08-21	unknown
Sample 713	+	B.1.1	29.3777	S	20B	0.12625	336.42	MN	28	M	WHITE	NON HISPANIC OR LATINO	NextSeq	2021-05-21	yes
Sample 714	+	B.1.617.2	28.4561	S	21A (Delta)	0.2501	314.39	ND					NovaSeq	2021-08-21	unknown
Sample 715	+	B.1.429	18.3733	S	20C	0.0023409	2848.4	NA		NA	NO INFORMATION	NO INFORMATION	NovaSeq	2021-04-21	no
Sample 716	+	B.1.1.7	26.6937	S	20I/501Y.V1	0.002242	1961.25	MN	45	F	WHITE	NON HISPANIC OR LATINO	NovaSeq	2021-04-21	no
Sample 717	+	B.1.617.2	18.8474	S	21A (Delta)	0.00742723	1593.11	MN					NextSeq	2021-09-21	unknown
Sample 718	+	AY.4	20.3913	S	21A (Delta)	0.00608859	1111.54	MN					NextSeq	2021-10-21	unknown
Sample 719	+	B.1.617.2	25.8865	S	21A (Delta)	0.0190365	1288.33	MN					NextSeq	2021-08-21	unknown
Sample 720	+	B.1.1.519	17.4665	S	20B	0.00247467	1801.17	MN	20	F	OTHER	HISPANIC OR LATINO	NovaSeq	2021-05-21	no
Sample 721	+	AY.12	28.0263	S	21A (Delta)	0.13185	730.27	MN					NextSeq	2021-09-21	unknown
Sample 722	+	B.1.526	22.8583	S	20C	0.00167263	1214.66	NJ	20	M	BLACK	NO INFORMATION	NextSeq	2021-04-21	no
Sample 723	+	B.1.617.2	16.4271	S	21A (Delta)	0.00260957	1225.68						NovaSeq	2021-09-21	unknown
Sample 724	+	AY.3	19.9564	S	21A (Delta)	0.00695885	1738.87	MN					NextSeq	2021-10-21	unknown
Sample 725	+	AY.4	23.1196	S	21A (Delta)	0.0105274	959.07	MN					NextSeq	2021-10-21	unknown
Sample 726	+	B.1.1.7	25.4494	S	20I/501Y.V1	0.035437	631.64	OK	60	M	WHITE	NON HISPANIC OR LATINO	NextSeq	2021-04-21	no
Sample 727	+	B.1.1.7	28.9482	S	20I/501Y.V1	0.0831939	637.56	MN	46	F	WHITE	NON HISPANIC OR LATINO	NextSeq	2021-04-21	no
Sample 728	+	B.1.1.7	29.1837	S	20I/501Y.V1	0.110594	516.65	NA		NA	NO INFORMATION	NO INFORMATION	NextSeq	2021-04-21	no
Sample 729	-	Sample Not Detected	23.5581	S				MN					NovaSeq	2021-10-21	unknown
Sample 730	+	B.1.617.2	27.9943	S	21A (Delta)	0.0496404	1010.69	MN					NextSeq	2021-08-21	unknown
Sample 731	+	B.1.617.2	11.9837	S	21A (Delta)	0.00240883	1313.69	MN					NovaSeq	2021-09-21	unknown
Sample 732	+	B.1.1.7	18.1312	S	20I/501Y.V1	0.00244278	1353.05	NJ	47	M	WHITE	NON HISPANIC OR LATINO	NextSeq	2021-04-21	no
Sample 733	+	Could Not Generate	28.5647	S	20A	0.538734	176.59	MN					NextSeq	2021-10-21	unknown
Sample 734	+	AY.25	17.6506	S	21A (Delta)	0.011375	1413.86	CA					NextSeq	2021-09-21	unknown
Sample 735	+	AY.3	20.5079	S	21A (Delta)	0.0138178	1124.67	MN					NextSeq	2021-10-21	unknown
Sample 736	+	AY.3.1	22.4373	S	21A (Delta)	0.0166945	1592.47	MN					NextSeq	2021-08-21	unknown
Sample 737	+	Could Not Generate	27.3238	S	20A	0.394863	181.73	MN					NextSeq	2021-08-21	unknown
Sample 738	+	B.1.1.7	19.7666	S	20I/501Y.V1	0.00160653	1273.93	MN	54	F	WHITE	DECLINE TO IDENTIFY	NextSeq	2021-04-21	no
Sample 739	+	AY.4	20.3637	S	21A (Delta)	0.00863165	2608.83	NM					NovaSeq	2021-09-21	unknown
Sample 740	+	AY.4	26.0349	S	21A (Delta)	0.0828371	463.22	MN					NextSeq	2021-10-21	unknown
Sample 741	+	B.1.429	27.4786	S	20C	0.0170551	1098.56	MN	31	F	WHITE	NON HISPANIC OR LATINO	NextSeq	2021-04-21	no
Sample 742	-	Sample Not Detected	28.6054	S				PA					NextSeq	2021-10-21	unknown
Sample 743	+	B.1.1.519	20.9359	S	20B	0.00123733	2765.51	MN	42	F	WHITE	NON HISPANIC OR LATINO	NovaSeq	2021-04-21	no
Sample 744	+	B.1.617.2	28.6035	S	21A (Delta)	0.033824	685.4	MN					NextSeq	2021-09-21	unknown
Sample 745	+	P.1	23.6069	S	20J/501Y.V3	0.0151515	903.13	ID	45	F	WHITE	UNKNOWN	NextSeq	2021-05-21	no
Sample 746	-	Sample Not Detected	24.5538	S				MN					NovaSeq	2021-09-21	unknown
Sample 747	+	AY.4	18.9726	S	21A (Delta)	0.00257611	1387.53	MN					NextSeq	2021-10-21	unknown
Sample 748	+	AY.4	24.0668	S	21A (Delta)	0.00337906	1770.12	MN					NovaSeq	2021-10-21	unknown
Sample 749	-	Sample Not Detected	19.6752	S				MN					NovaSeq	2021-10-21	unknown
Sample 750	+	B.1.617.2	15.5085	S	21A (Delta)	0.00240883	1753.56	MN					NextSeq	2021-10-21	unknown
Sample 751	+	B.1.526	22.5618	S	21F (IOTA)	0.00270966	1497.28	MN	11	F	WHITE	NON HISPANIC OR LATINO	NovaSeq	2021-06-21	no
Sample 752	+	B.1.617.2	20.2151	S	21A (Delta)	0.00792907	996.21	MN					NovaSeq	2021-09-21	unknown
Sample 753	+	AY.25	25.3025	S	21A (Delta)	0.0938441	370.23	MN					NovaSeq	2021-08-21	unknown
Sample 754	+	AY.4	22.6342	S	21A (Delta)	0.00926731	974.7	MN					NextSeq	2021-08-21	unknown
Sample 755	+	A	28.0003	S	21A (Delta)	0.479039	281.76	TX					NextSeq	2021-09-21	unknown
Sample 756	-	Sample Not Detected	26.848	S				MN					NovaSeq	2021-10-21	unknown
Sample 757	+	B.1.617.2	16.6851	S	21A (Delta)	0.00317832	1536.68	OH					NovaSeq	2021-09-21	unknown
Sample 758	+	AY.25	24.337	S	21A (Delta)	0.0141184	2616.45	MN					NovaSeq	2021-10-21	unknown
Sample 759	+	B.1.1.7	25.6064	S	20I (ALPHA, V1)	0.00271048	1465.99	ND	26	F	WHITE	NON HISPANIC OR LATINO	NovaSeq	2021-05-21	no
Sample 760	+	AY.12	13.6012	S	21A (Delta)	0.00270994	1253.09	MN					NextSeq	2021-09-21	unknown
Sample 761	+	B.1.1.7	17.3353	S	20I/501Y.V1	0.0014389	1744.48	NA		NA	NO INFORMATION	NO INFORMATION	NextSeq	2021-04-21	no
Sample 762	+	B.1.617.2	18.4655	S	21A (Delta)	0.0111743	1566.21	MN					NextSeq	2021-07-21	unknown
Sample 763	+	AY.3	23.4464	S	21A (Delta)	0.0113416	1693.27	MN					NovaSeq	2021-10-21	unknown
Sample 764	+	B.1.1.7	24.1721	S	20I/501Y.V1	0.0229889	1304.34	MN	30	M	DECLINE TO IDENTIFY	DECLINE TO IDENTIFY	NovaSeq	2021-05-21	no
Sample 765	+	P.1	20.374	S	20J/501Y.V3	0.0090307	1428.54	IL	20	F	WHITE	NON HISPANIC OR LATINO	NextSeq	2021-05-21	yes
Sample 766	+	B.1.1.7	26.8878	S	20I/501Y.V1	0.0718779	683.53	MN	22	F	WHITE	NON HISPANIC OR LATINO	NextSeq	2021-04-21	no
Sample 767	+	AY.25	17.8185	S	21A (Delta)	0.00247574	3433.06	MN					NovaSeq	2021-10-21	unknown
Sample 768	+	AY.3	24.9719	S	21A (Delta)	0.0125795	1930.78	MN					NovaSeq	2021-10-21	unknown
Sample 769	+	AY.25	26.0149	S	21A (Delta)	0.0402141	643.26	MN					NextSeq	2021-09-21	unknown
Sample 770	+	AY.4	14.7797	S	21A (Delta)	0.00254266	1894.06	MN					NextSeq	2021-08-21	unknown
Sample 771	+	B.1.1.7	29.5209	S	20I/501Y.V1	0.1667	961.83	MN	20	F	DECLINE TO IDENTIFY	NON HISPANIC OR LATINO	NovaSeq	2021-04-21	no
Sample 772	+	B.1.617.2	27.8872	S	21A (Delta)	0.195566	262.85						NextSeq	2021-08-21	unknown
Sample 773	-	Sample Not Detected	21.7723	S				MN					NovaSeq	2021-10-21	unknown
Sample 774	+	AY.6	24.64	S	21A (Delta)	0.0349615	845.13	WV					NextSeq	2021-08-21	unknown
Sample 775	+	Could Not Generate	26.4616	S	20A	0.586417	357.97	MN					NextSeq	2021-09-21	unknown
Sample 776	+	AY.39	25.5807	S	21A (Delta)	0.00552024	1398.66	MN					NovaSeq	2021-10-21	unknown
Sample 777	+	B.1.1.7	19.4699	S	20I/501Y.V1	0.00277741	1305.15	MN	18	F	WHITE	NON HISPANIC OR LATINO	NextSeq	2021-04-21	yes
Sample 778	+	AY.4	19.8819	S	21A (Delta)	0.00230846	2768.93	MN					NovaSeq	2021-10-21	unknown
Sample 779	+	B.1.429	25.7421	S	20C	0.0182256	792.83	MN	25	F	BLACK	NON HISPANIC OR LATINO	NextSeq	2021-04-21	no
Sample 780	+	B.1.1.7	27.5494	S	20I/501Y.V1	0.38583	349.47	TX	28	F	WHITE	NO INFORMATION	NextSeq	2021-04-21	no
Sample 781	+	B.1.617.2	12.6267	S	21A (Delta)	0.00234192	3046.56	MN					NovaSeq	2021-10-21	unknown
Sample 782	+	B.1.2	28.4858	S	20G	0.0371535	909.49	ND	9	F	WHITE	NON HISPANIC OR LATINO	NextSeq	2021-04-21	no
Sample 783	+	B.1.617.2	25.7114	S	21A (Delta)	0.0332218	896.58	NJ					NovaSeq	2021-07-21	unknown
Sample 784	+	B.1.1.7	21.4625	S	20I (ALPHA, V1)	0.00274394	1757.8	WI	50	F	WHITE	NON HISPANIC OR LATINO	NovaSeq	2021-05-21	no
Sample 785	+	B.1.1.7	28.247	S	20I/501Y.V1	0.283463	683.94	MN	25	M	WHITE	DECLINE TO IDENTIFY	NextSeq	2021-05-21	no
Sample 786	+	B.1.2	14.524	S	20G	0.000568505	1504	NA		NA	NO INFORMATION	NO INFORMATION	NextSeq	2021-04-21	no
Sample 787	+	B.1.1.7	27.5362	S	20I/501Y.V1	0.0405568	1019.08	NA		NA	NO INFORMATION	NO INFORMATION	NextSeq	2021-04-21	no
Sample 788	+	B.1.2	25.8015	S	20G	0.00812627	1859.91	MN	40	F	WHITE	HISPANIC OR LATINO	NovaSeq	2021-04-21	no
Sample 789	+	B.1.1.7	21.51	S	20I/501Y.V1	0.00277741	1216.96	MN	15	M	WHITE	NON HISPANIC OR LATINO	NextSeq	2021-05-21	no
Sample 790	+	AY.3	19.6165	S	21A (Delta)	0.0151906	1461.64	MN					NextSeq	2021-09-21	unknown
Sample 791	+	Could Not Generate	28.065	S	20A	0.537597	291.66	MN					NextSeq	2021-10-21	unknown
Sample 792	+	B.1.429	14.5139	S	20C	0.0111375	2671.55	NA		NA	NO INFORMATION	NO INFORMATION	NovaSeq	2021-04-21	no
Sample 793	+	B.1.617.2	22.9363	S	21A (Delta)	0.0254266	992.06	MN					NextSeq	2021-09-21	unknown
Sample 794	+	Could Not Generate	26.7258	S	19A	0.626579	275.97	CA					NextSeq	2021-09-21	unknown
Sample 795	+	AY.25	23.3443	S	21A (Delta)	0.0205761	1344.75	MN					NextSeq	2021-10-21	unknown
Sample 796	+	B.1.1.7	14.645	S	20I/501Y.V1	0.00247624	1734.46	MN	25	M	WHITE	NON HISPANIC OR LATINO	NextSeq	2021-05-21	no
Sample 797	+	AY.25	14.0993	S	21A (Delta)	0.0234861	1013	MN					NovaSeq	2021-10-21	unknown
Sample 798	+	B.1.617.2	22.8864	S	21A (Delta)	0.0210104	1556.64	MN					NextSeq	2021-10-21	unknown
Sample 799	+	AY.24	22.9858	S	21A (Delta)	0.00746294	2153.47	MN					NovaSeq	2021-10-21	unknown
Sample 800	+	B.1.1.7	25.5188	S	20I/501Y.V1	0.018873	1010.81	MN	19	M	WHITE	NON HISPANIC OR LATINO	NextSeq	2021-04-21	no
Sample 801	+	B.1.617.2	15.7197	S	21A (Delta)	0.00277685	1486.71	MN					NovaSeq	2021-09-21	unknown
Sample 802	+	B.1.1.7	24.5018	S	20I (ALPHA, V1)	0.0172368	1301.85	MN	6	M	BLACK	NON HISPANIC OR LATINO	NovaSeq	2021-06-21	no
Sample 803	+	B.1.1.7	20.3446	S	20I/501Y.V1	0.000936956	3367.28	MN	29	F	WHITE	NON HISPANIC OR LATINO	NovaSeq	2021-04-21	no
Sample 804	+	B.1.1.7	20.9488	S	20I/501Y.V1	0.00254317	1205.98	MN	17	M	WHITE	NON HISPANIC OR LATINO	NextSeq	2021-05-21	no
Sample 805	+	AY.4	19.4219	S	21A (Delta)	0.00618936	1450.65	MN					NextSeq	2021-10-21	unknown
Sample 806	+	B.1.1.7	20.5413	S	20I (ALPHA, V1)	0.00271048	1477.42	MN	57	M	WHITE	DECLINE TO IDENTIFY	NovaSeq	2021-05-21	no
Sample 807	+	B.1.1.7	16.5208	S	20I/501Y.V1	0.00194084	915.31	MN	49	M	WHITE	NON HISPANIC OR LATINO	NextSeq	2021-04-21	no
Sample 808	+	AY.25	22.5157	S	21A (Delta)	0.0195049	1026.94	TX					NextSeq	2021-09-21	unknown
Sample 809	+	B.1.617.2	25.5888	S	21A (Delta)	0.0273753	806.11	NM					NextSeq	2021-10-21	unknown
Sample 810	+	AY.4	24.2113	S	21A (Delta)	0.0393108	606.77	MN					NextSeq	2021-08-21	unknown
Sample 811	+	AY.25	14.3476	S	21A (Delta)	0.00689194	2776.33	MN					NovaSeq	2021-10-21	unknown
Sample 812	+	AY.25	14.9418	S	21A (Delta)	0.0356641	747.04						NovaSeq	2021-09-21	unknown
Sample 813	+	Could Not Generate	27.5304	S	19A	0.921914	226.55	MN	7	M	WHITE	NON HISPANIC OR LATINO	NextSeq	2021-04-21	no
Sample 814	+	B.1.526.2	23.1151	S	20C	0.00405089	967.49	MN	32	M	WHITE	NON HISPANIC OR LATINO	NextSeq	2021-05-21	no
Sample 815	+	AY.4	25.8727	S	21A (Delta)	0.0251924	1373.53	MN					NextSeq	2021-10-21	unknown
Sample 816	+	B.1.617.2	21.7948	S	21A (Delta)	0.0234527	1440.6	MN					NextSeq	2021-10-21	unknown
Sample 817	+	B.1.1.7	25.4182	S	20I/501Y.V1	0.00291126	1067.56	MN	9	M	BLACK	NON HISPANIC OR LATINO	NextSeq	2021-04-21	no
Sample 818	+	B.1.1.7	25.3991	S	20I/501Y.V1	0.0293133	703.26	MN	25	F	WHITE	UNKNOWN	NextSeq	2021-05-21	yes
Sample 819	+	B.1.1.7	14.4111	S	20I/501Y.V1	0.00247624	1626.99	MN	18	F	ASIAN	NON HISPANIC OR LATINO	NextSeq	2021-04-21	yes
Sample 820	+	AY.4	21.381	S	21A (Delta)	0.00314486	1344.84	MN					NextSeq	2021-09-21	unknown
Sample 821	+	B.1.1.7	25.3904	S	20I/501Y.V1	0.142585	787.44	MN	15	F	WHITE	NON HISPANIC OR LATINO	NextSeq	2021-05-21	no
Sample 822	+	B.1.1.7	29.034	S	20I/501Y.V1	0.129936	556.31	MN	25	F	WHITE	NON HISPANIC OR LATINO	NextSeq	2021-05-21	no
Sample 823	+	B.1.617.2	15.5477	S	21A (Delta)	0.00237538	3142.7	MN					NovaSeq	2021-10-21	unknown
Sample 824	+	AY.12	25.4873	S	21A (Delta)	0.109981	509.09	MN					NextSeq	2021-09-21	unknown
Sample 825	+	AY.4	20.704	S	21A (Delta)	0.00732907	2631.16	MN					NovaSeq	2021-10-21	unknown
Sample 826	+	AY.42	13.3787	S	21A (Delta)	0.205813	1302.87	MN					NextSeq	2021-10-21	unknown
Sample 827	+	Could Not Generate	28.5881	S	20A	0.652811	223.4	MN					NextSeq	2021-10-21	unknown
Sample 828	+	B.1.617.2	22.0423	S	21A (Delta)	0.334092	365.2	NM					NovaSeq	2021-08-21	unknown
Sample 829	+	B.1.1.519	22.7896	S	20B	0.000769154	1272.83	ID	13	F	WHITE	NON HISPANIC OR LATINO	NextSeq	2021-04-21	no
Sample 830	+	Could Not Generate	26.5419	S	19A	0.932942	160.32	NA		NA	NO INFORMATION	NO INFORMATION	NextSeq	2021-04-21	no
Sample 831	+	B.1.617.2	23.1158	S	21A (Delta)	0.0199398	1069.57	MN					NextSeq	2021-10-21	unknown
Sample 832	+	AY.3	26.725	S	21A (Delta)	0.0489127	2143.74	MN					NovaSeq	2021-10-21	unknown
Sample 833	+	B.1.526.1	13.6567	S	20C	0.000769488	1604.68	NJ	17	F	WHITE	NON HISPANIC OR LATINO	NextSeq	2021-04-21	no
Sample 834	+	B.1.1.7	13.724	S	20I/501Y.V1	0.0110427	1341.22	MN	29	M	WHITE	NON HISPANIC OR LATINO	NextSeq	2021-05-21	no
Sample 835	+	B.1.526	21.5638	S	20C	0.00167263	1116.74	NJ	63	M	BLACK	NON HISPANIC OR LATINO	NextSeq	2021-04-21	yes
Sample 836	+	AY.4	21.6981	S	21A (Delta)	0.0108397	954.48	WY					NovaSeq	2021-08-21	unknown
Sample 837	+	AY.3	13.6197	S	21A (Delta)	0.00618936	2825.32	MN					NovaSeq	2021-10-21	unknown
Sample 838	+	Could Not Generate	17.4413	S	21A (Delta)	0.00444965	1794.95	MN					NextSeq	2021-09-21	unknown
Sample 839	+	B.1.617.2	25.2762	S	21A (Delta)	0.0323854	757.21	MN					NovaSeq	2021-07-21	unknown
Sample 840	+	AY.25	24.8333	S	21A (Delta)	0.0270325	819.29	MN					NextSeq	2021-09-21	unknown
Sample 841	+	B.1.1.7	24.0637	S	20I/501Y.V1	0.0117789	949.34	MN	47	F	ASIAN	NON HISPANIC OR LATINO	NextSeq	2021-05-21	no
Sample 842	+	AY.4	22.1086	S	21A (Delta)	0.0579793	627.25	MN					NextSeq	2021-10-21	unknown
Sample 843	+	B.1.1.7	27.1368	S	20I/501Y.V1	0.0347678	1315.97	MN	38	M	WHITE	UNKNOWN	NovaSeq	2021-04-21	no
Sample 844	+	B.1.526	22.5375	S	20C	0.00281002	1199.63	NJ	62	F	WHITE	DECLINE TO IDENTIFY	NextSeq	2021-04-21	no
Sample 845	+	AY.25	18.8013	S	21A (Delta)	0.053753	962.52	CA	40	female		Hispanic or Latino	NovaSeq	2021-10-21	unknown
Sample 846	+	Could Not Generate	29.8695	S	21A (Delta)	0.543618	357.77	NJ					NextSeq	2021-10-21	unknown
Sample 847	+	AY.24	22.4807	S	21A (Delta)	0.0772112	533.96	MN					NextSeq	2021-10-21	unknown
Sample 848	+	B.1.1.7	16.3337	S	20I/501Y.V1	0.002242	2624.91	MN	30	M	WHITE	DECLINE TO IDENTIFY	NovaSeq	2021-05-21	no
Sample 849	+	B.1.526.1	13.8251	S	20C	0.00240883	1652.41	NA		NA	NO INFORMATION	NO INFORMATION	NextSeq	2021-04-21	unknown
Sample 850	+	B.1.617.2	16.8866	S	21A (Delta)	0.00525171	3402.34	MN					NovaSeq	2021-10-21	unknown
Sample 851	+	B.1.1.7	26.7744	S	20I/501Y.V1	0.016631	696.82	MN	18	F	WHITE	UNKNOWN	NextSeq	2021-04-21	no
Sample 852	+	AY.25	27.6016	S	21A (Delta)	0.143106	299.9	DE					NextSeq	2021-10-21	unknown
Sample 853	+	AY.25	21.3731	S	21A (Delta)	0.125125	662.31						NovaSeq	2021-09-21	unknown
Sample 854	+	Could Not Generate	29.6704	S	21A (Delta)	0.565843	398.19	MN					NextSeq	2021-10-21	unknown
Sample 855	+	B.1.1.7	14.8879	S	20I/501Y.V1	0.00244278	1417.89	MN	51	M	WHITE	NON HISPANIC OR LATINO	NextSeq	2021-04-21	no
Sample 856	+	B.1.617.2	28.4652	S	20A	0.182834	618.82	MN					NovaSeq	2021-07-21	unknown
Sample 857	+	B.1.617.2	17.0122	S	21A (Delta)	0.0114085	1346.44	MN					NextSeq	2021-09-21	unknown
Sample 858	+	B.1.1.7	24.9409	S	20I/501Y.V1	0.00358051	1222.9	MN	41	F	WHITE	NON HISPANIC OR LATINO	NextSeq	2021-05-21	yes
Sample 859	+	AY.4.1	22.9759	S	21A (Delta)	0.311043	654.26	MN					NextSeq	2021-10-21	unknown
Sample 860	+	B.1.617.2	24.3859	S	21A (Delta)	0.0136501	1381.27	MN					NextSeq	2021-10-21	unknown
Sample 861	+	B.1.1.7	25.9082	S	20I/501Y.V1	0.00123812	2068.1	MN	12	M	WHITE	UNKNOWN	NovaSeq	2021-04-21	no
Sample 862	+	B.1.617.2	28.035	S	21A (Delta)	0.283315	321.22	CA					NovaSeq	2021-09-21	unknown
Sample 863	+	B.1.1.7	17.1937	S	20I (ALPHA, V1)	0.0109423	1623.87	MN	39	M	WHITE	NON HISPANIC OR LATINO	NovaSeq	2021-06-21	no
Sample 864	+	B.1.1.7	16.4475	S	20I/501Y.V1	0.0220185	1150.61	MN	41	M	DECLINE TO IDENTIFY	DECLINE TO IDENTIFY	NextSeq	2021-05-21	no
Sample 865	+	AY.12	25.8524	S	21A (Delta)	0.134112	312.17						NovaSeq	2021-09-21	unknown
Sample 866	+	AY.39	24.3012	S	21A (Delta)	0.00692539	1617.64	MN					NovaSeq	2021-10-21	unknown
Sample 867	+	AY.30	26.3962	S	21A (Delta)	0.00826363	2007.54	MN					NovaSeq	2021-10-21	unknown
Sample 868	+	B.1.617.2	23.1846	S	21A (Delta)	0.00274339	1374.39	MN					NextSeq	2021-07-21	unknown
Sample 869	+	Could Not Generate	29.9038	S	21A (Delta)	0.556201	318.61	WI					NovaSeq	2021-09-21	unknown
Sample 870	+	AY.25	21.2803	S	21A (Delta)	0.0066912	1363.73	MN					NextSeq	2021-10-21	unknown
Sample 871	+	B.1.1.7	23.1496	S	20I/501Y.V1	0.0128831	829.63	NJ	55	M	OTHER	HISPANIC OR LATINO	NextSeq	2021-04-21	no
Sample 872	+	AY.4	19.7108	S	21A (Delta)	0.00572098	1442.74	MN					NextSeq	2021-10-21	unknown
Sample 873	+	B.1.617.2	16.8471	S	21A (Delta)	0.0025092	1833.41	CA					NovaSeq	2021-08-21	unknown
Sample 874	+	B.1.1.7	26.4568	S	20I/501Y.V1	0.0356043	864.17	NA		NA	NO INFORMATION	NO INFORMATION	NextSeq	2021-04-21	no
Sample 875	+	AY.25	16.6877	S	21A (Delta)	0.00224155	2993.91	MN					NovaSeq	2021-10-21	unknown
Sample 876	+	B.1.526.2	17.0795	S	20C	0.00147305	1588.72	NA		NA	NO INFORMATION	NO INFORMATION	NextSeq	2021-04-21	no
Sample 877	+	B.1.1.7	18.7005	S	20I/501Y.V1	0.00247624	1291.9	MN	60	M	WHITE	NON HISPANIC OR LATINO	NextSeq	2021-05-21	yes
Sample 878	+	AY.25	15.5777	S	21A (Delta)	0.0184008	1451.46	MN					NextSeq	2021-10-21	unknown
Sample 879	+	AY.25	19.4704	S	21A (Delta)	0.0194045	1592.16	MN					NextSeq	2021-09-21	unknown
Sample 880	+	AY.39	29.1384	S	21A (Delta)	0.145973	609.1	MN					NextSeq	2021-10-21	unknown
Sample 881	+	B.1.617.2	18.6469	S	21A (Delta)	0.00224155	1830.39	NJ					NovaSeq	2021-07-21	unknown
Sample 882	+	AY.3	20.3844	S	21A (Delta)	0.0461997	1202.73	MN					NovaSeq	2021-10-21	unknown
Sample 883	+	AY.39	24.6179	S	21A (Delta)	0.058916	686.76	MN					NovaSeq	2021-10-21	unknown
Sample 884	+	AY.25	23.2531	S	21A (Delta)	0.0220674	951.91	MN					NextSeq	2021-09-21	unknown
Sample 885	+	B.1.617.2	15.1588	S	21A (Delta)	0.00588826	1514.95	MN					NextSeq	2021-09-21	unknown
Sample 886	+	B.1.1.7	22.2256	S	20I/501Y.V1	0.00629099	1289.47	NA		NA	NO INFORMATION	NO INFORMATION	NextSeq	2021-04-21	no
Sample 887	+	AY.3.1	20.67	S	21A (Delta)	0.0252927	1232.72	MN					NovaSeq	2021-09-21	unknown
Sample 888	+	B.1.1.519	18.2906	S	20B	0.00224058	2841.75	MN	42	M	WHITE	UNKNOWN	NovaSeq	2021-05-21	yes
Sample 889	+	AY.25	21.7414	S	21A (Delta)	0.0331214	782.71	PA					NextSeq	2021-09-21	unknown
Sample 890	+	B.1.1.7	22.6254	S	20I/501Y.V1	0.0171664	825.48	MN	40	M	DECLINE TO IDENTIFY	DECLINE TO IDENTIFY	NextSeq	2021-04-21	no
Sample 891	+	B	22.4624	S	21A (Delta)	0.121378	805.16	MN					NovaSeq	2021-10-21	unknown
Sample 892	+	B.1.1.7	18.7353	S	20I/501Y.V1	0.00445054	1279.21	NM	31	F	OTHER	HISPANIC OR LATINO	NextSeq	2021-04-21	no
Sample 893	+	B.1.617.2	16.3012	S	21A (Delta)	0.00679157	1628.94	CA					NextSeq	2021-09-21	unknown
Sample 894	+	AY.4	18.345	S	21A (Delta)	0.00224155	2711.01	MN					NovaSeq	2021-10-21	unknown
Sample 895	+	AY.25	25.1662	S	21A (Delta)	0.0367681	732.08	MN					NextSeq	2021-09-21	unknown
Sample 896	+	A	27.7379	S	21A (Delta)	0.315527	238.78	MN					NextSeq	2021-10-21	unknown
Sample 897	+	B.1.617.2	23.1231	S	21A (Delta)	0.01636	1775.18						NextSeq	2021-07-21	unknown
Sample 898	+	B.1.617.2	11.6834	S	21A (Delta)	0.00240883	1927.31	WV					NextSeq	2021-09-21	unknown
Sample 899	+	AY.3	25.1741	S	21A (Delta)	0.0313817	773.67	MN					NextSeq	2021-10-21	unknown
Sample 900	+	Could Not Generate	23.3112	S	19A	0.902618	246.19	NA		NA	NO INFORMATION	NO INFORMATION	NextSeq	2021-04-21	no
Sample 901	+	B.1.1.7	24.307	S	20I/501Y.V1	0.00351359	906.82	MN	18	F	WHITE	UNKNOWN	NextSeq	2021-05-21	yes
Sample 902	+	AY.12	23.6034	S	21A (Delta)	0.0345266	631.39	MN					NovaSeq	2021-09-21	unknown
Sample 903	+	AY.4	18.4133	S	21A (Delta)	0.00434928	1615.12	MN					NextSeq	2021-10-21	unknown
Sample 904	+	AY.39	26.3755	S	21A (Delta)	0.040716	1100.44	MN					NovaSeq	2021-10-21	unknown
Sample 905	+	B.1.617.2	21.3543	S	21A (Delta)	0.0127802	1453.18	MN					NextSeq	2021-09-21	unknown
Sample 906	+	B.1.1.7	16.8919	S	20I/501Y.V1	0.00160621	1367.41	MN	61	F	BLACK	DECLINE TO IDENTIFY	NextSeq	2021-04-21	no
Sample 907	+	B.1.617.2	23.9695	S	21A (Delta)	0.00455002	1725.41	LA					NovaSeq	2021-07-21	unknown
Sample 908	+	B.1.1.7	23.4155	S	20I/501Y.V1	0.00304511	1111.1	NA		NA	NO INFORMATION	NO INFORMATION	NextSeq	2021-04-21	no
Sample 909	+	B.1.617.2	18.6844	S	21A (Delta)	0.0104383	1720.29	MN					NovaSeq	2021-09-21	unknown
Sample 910	+	AY.29.1	22.664	S	21A (Delta)	0.00244229	2079.26	MN					NovaSeq	2021-10-21	unknown
Sample 911	+	B.1.1.7	17.8407	S	20I/501Y.V1	3.35e-05	3338.12	MN	13	M	AMERICAN INDIAN OR ALASKAN TIVE	NON HISPANIC OR LATINO	NovaSeq	2021-04-21	no
Sample 912	+	B.1.1.7	25.6708	S	20I/501Y.V1	0.363804	261.96	ND	25	F	WHITE	HISPANIC OR LATINO	NextSeq	2021-05-21	no
Sample 913	+	B.1.2	12.6821	S	20G	0.000434739	1538.72	MN	44	M	WHITE	NON HISPANIC OR LATINO	NextSeq	2021-04-21	no
Sample 914	+	AY.29.1	24.2767	S	21A (Delta)	0.013518	932.83	MN					NextSeq	2021-10-21	unknown
Sample 915	+	AY.24	16.3121	S	21A (Delta)	0.0114253	1648.01	MN					NextSeq	2021-10-21	unknown
Sample 916	+	Could Not Generate	27.2222	S	21A (Delta)	0.019371	1898.14	MN					NovaSeq	2021-09-21	unknown
Sample 917	+	B.1.617.2	16.5475	S	20A	0.00270939	1623.86	MN	66	M	ASIAN	NON HISPANIC OR LATINO	NextSeq	2021-05-21	yes
Sample 918	+	B.1.617.2	24.2169	S	21A (Delta)	0.0426229	890.66	MN					NovaSeq	2021-09-21	unknown
Sample 919	+	B.1.1.7	20.4874	S	20I/501Y.V1	0.00107081	3387.98	MN	10	F	WHITE	NON HISPANIC OR LATINO	NovaSeq	2021-04-21	no
Sample 920	+	AY.4	23.9131	S	21A (Delta)	0.0312364	828.46	MN					NextSeq	2021-09-21	unknown
Sample 921	+	B.1.1.7	19.3877	S	20I/501Y.V1	0.00254317	1224.4	MN	40	M	BLACK	NON HISPANIC OR LATINO	NextSeq	2021-05-21	no
Sample 922	+	B.1.617.2	21.5829	S	21A (Delta)	0.0187354	1350.82	MN					NextSeq	2021-09-21	unknown
Sample 923	+	B.1.617.2	22.972	S	21A (Delta)	0.0204751	1165.03	MN					NovaSeq	2021-08-21	unknown
Sample 924	+	B.1.1.7	18.4485	S	20I/501Y.V1	0.00271048	1348.06	MN	10	F	WHITE	NON HISPANIC OR LATINO	NextSeq	2021-05-21	no
Sample 925	+	Could Not Generate	12.4682	S	21A (Delta)	0.00237538	2581.8	WY					NovaSeq	2021-09-21	unknown
Sample 926	+	AY.19	13.7135	S	21A (Delta)	0.0107728	1840.99	MN					NextSeq	2021-10-21	unknown
Sample 927	+	Could Not Generate	26.256	S	21A (Delta)	0.0380729	709.29	ID					NextSeq	2021-09-21	unknown
Sample 928	+	B.1.40	28.2357	S	20A	0.395801	567.25	MN	12	F	WHITE	NON HISPANIC OR LATINO	NovaSeq	2021-05-21	no
Sample 929	+	B.1.1.7	23.0725	S	20I/501Y.V1	0.00522018	1079.44	MN	5	M	BLACK	NON HISPANIC OR LATINO	NextSeq	2021-04-21	no
Sample 930	+	B.1.1.7	22.98	S	20I/501Y.V1	0.0108419	725.93	MN	32	F	WHITE	NON HISPANIC OR LATINO	NextSeq	2021-04-21	no
Sample 931	+	B.1.617.2	17.9493	S	21A (Delta)	0.00645701	1611.7	MN					NextSeq	2021-10-21	unknown
Sample 932	+	AY.4	17.6468	S	21A (Delta)	0.00247574	1870.77	MN					NextSeq	2021-08-21	unknown
Sample 933	+	B.1.617.2	24.4657	S	21A (Delta)	0.0356306	763.62	MN					NovaSeq	2021-10-21	unknown
Sample 934	+	AY.39	29.0953	S	21A (Delta)	0.128065	635.66	WV					NextSeq	2021-10-21	unknown
Sample 935	+	B.1.427	26.9324	S	20C	0.0510317	688.49	MN	28	M	ASIAN	DECLINE TO IDENTIFY	NextSeq	2021-04-21	no
Sample 936	-	Sample Not Detected	25.0096	S				WI	64	F	WHITE	NON HISPANIC OR LATINO	NextSeq	2021-04-21	yes
Sample 937	+	Could Not Generate	20.2767	S	21A (Delta)	0.00936768	2316.66	MN					NovaSeq	2021-09-21	unknown
Sample 938	+	B.1.617.2	20.9615	S	21A (Delta)	0.0251589	2748.44	NM					NovaSeq	2021-10-21	unknown
Sample 939	+	B.1.2	15.5999	S	20G	0.00147142	1490.86	MN	62	M	WHITE	NON HISPANIC OR LATINO	NextSeq	2021-04-21	no
Sample 940	+	B.1.1.7	28.0501	S	20I (ALPHA, V1)	0.298521	756.18	MN	25	M	ASIAN	NON HISPANIC OR LATINO	NovaSeq	2021-05-21	yes
Sample 941	+	B.1.1.7	17.9136	S	20I/501Y.V1	0.00240932	2229.89	MN	45	F	WHITE	DECLINE TO IDENTIFY	NovaSeq	2021-05-21	no
Sample 942	+	B.1.1.7	20.6037	S	20I/501Y.V1	0.00234239	3022.94	NA		NA	NO INFORMATION	NO INFORMATION	NovaSeq	2021-04-21	no
Sample 943	+	AY.4	22.4643	S	21A (Delta)	0.00565406	2045.58	MN					NovaSeq	2021-10-21	unknown
Sample 944	+	B.1.1.7	23.9954	S	20I/501Y.V1	0.00237585	1116.47	MN	28	F	WHITE	NON HISPANIC OR LATINO	NextSeq	2021-04-21	no
Sample 945	+	B.1.526	22.2935	S	20C	0.0383367	812.25	NJ	47	M	DECLINE TO IDENTIFY	DECLINE TO IDENTIFY	NextSeq	2021-04-21	no
Sample 946	+	AY.4	20.5314	S	21A (Delta)	0.00237538	3058.04	MN					NovaSeq	2021-10-21	unknown
Sample 947	+	AY.25	26.1405	S	21A (Delta)	0.0459016	632.24	MN					NextSeq	2021-09-21	unknown
Sample 948	+	B.1.617.2	21.7926	S	21A (Delta)	0.0146203	1087.22	WY					NextSeq	2021-10-21	unknown
Sample 949	+	B.1.1.7	18.9869	S	20I/501Y.V1	0.00287962	1344.47	NY	39	M	WHITE	NON HISPANIC OR LATINO	NextSeq	2021-04-21	no
Sample 950	+	AY.20	23.086	S	21A (Delta)	0.0139512	1072.32	MN					NextSeq	2021-10-21	unknown
Sample 951	+	B.1.1.7	14.7869	S	20I/501Y.V1	0.000870031	1429.66	NA		NA	NO INFORMATION	NO INFORMATION	NextSeq	2021-04-21	no
Sample 952	+	B.1.1.7	21.4074	S	20I/501Y.V1	0.00281087	1284.83	MN	37	F	WHITE	NON HISPANIC OR LATINO	NextSeq	2021-05-21	no
Sample 953	+	B.1.1.7	21.201	S	20I/501Y.V1	0.00926917	1187.56	NA		NA	NO INFORMATION	NO INFORMATION	NextSeq	2021-04-21	no
Sample 954	+	AY.20	14.2077	S	21A (Delta)	0.00953496	1075.03	MN					NovaSeq	2021-09-21	unknown
Sample 955	+	B.1.1.7	25.7571	S	20I/501Y.V1	0.0622072	617.21	MN	40	M	WHITE	DECLINE TO IDENTIFY	NextSeq	2021-05-21	no
Sample 956	+	B.1.1.7	21.5704	S	20I/501Y.V1	0.00264356	1135.76	MN	59	M	WHITE	HISPANIC OR LATINO	NextSeq	2021-05-21	no
Sample 957	+	AY.4	23.3848	S	21A (Delta)	0.00628973	1075.24	ID					NextSeq	2021-10-21	unknown
Sample 958	+	B.1.1.7	16.5223	S	20I/501Y.V1	0.00264356	1239.7	WV	27	F	WHITE	NON HISPANIC OR LATINO	NextSeq	2021-05-21	no
Sample 959	+	AY.39	24.3059	S	21A (Delta)	0.0213449	1321.11	MN					NextSeq	2021-10-21	unknown
Sample 960	+	B.1.617.2	19.8595	S	21A (Delta)	0.00284376	1157.68	MN					NextSeq	2021-09-21	unknown
Sample 961	+	B.1.617.2	22.3285	S	21A (Delta)	0.0129453	1244.32	MN					NovaSeq	2021-08-21	unknown
Sample 962	+	Could Not Generate	29.8985	S	21A (Delta)	0.239865	309.07	TN					NovaSeq	2021-08-21	unknown
Sample 963	+	B.1.1.7	27.3708	S	20I/501Y.V1	0.180793	489.19	MN	26	F	DECLINE TO IDENTIFY	DECLINE TO IDENTIFY	NextSeq	2021-05-21	no
Sample 964	+	Could Not Generate	23.4148	S	21A (Delta)	0.0413851	740.63	MN					NextSeq	2021-09-21	unknown
Sample 965	+	Could Not Generate	29.2677	S	20A	0.723956	179.03	NJ	53	F			NextSeq	2021-10-21	unknown
Sample 966	+	B.1	29.4298	S	20B	0.31799	374.63	CA	66	M	HISPANIC OR LATINO	NO INFORMATION	NextSeq	2021-04-21	no
Sample 967	+	AY.12	27.8198	S	21A (Delta)	0.0821712	430						NovaSeq	2021-08-21	unknown
Sample 968	+	AY.25	24.7039	S	21A (Delta)	0.0693208	890.73						NextSeq	2021-10-21	unknown
Sample 969	+	B.1.1.7	21.7175	S	20I/501Y.V1	0.00147325	1103.88	NJ	44	F	BLACK	NON HISPANIC OR LATINO	NextSeq	2021-04-21	no
Sample 970	+	Could Not Generate	18.1731	S	21A (Delta)	0.00652392	2757.55	MN					NovaSeq	2021-09-21	unknown
Sample 971	+	B.1.1.7	26.3238	S	20I/501Y.V1	0.0011712	2203.12	MN	30	M	WHITE	HISPANIC OR LATINO	NovaSeq	2021-04-21	no
Sample 972	+	B.1.1.7	21.5271	S	20I/501Y.V1	0.00281087	1068.29	MN	34	M	BLACK	NON HISPANIC OR LATINO	NextSeq	2021-05-21	no
Sample 973	+	B.1.1.7	22.9603	S	20I/501Y.V1	0.00284433	1445.36	MN	15	M	WHITE	NON HISPANIC OR LATINO	NextSeq	2021-04-21	no
Sample 974	+	B.1.1.7	17.5109	S	20I/501Y.V1	0.000535404	3079.2	WY	45	F	WHITE	DECLINE TO IDENTIFY	NovaSeq	2021-04-21	no
Sample 975	+	AY.4	17.7796	S	21A (Delta)	0.00772834	1424.9	MN					NextSeq	2021-08-21	unknown
Sample 976	+	AY.23	19.4925	S	21A (Delta)	0.269605	1936.27	MN					NovaSeq	2021-09-21	unknown
Sample 977	+	AY.24	19.9454	S	21A (Delta)	0.0194103	1305.58	MN					NextSeq	2021-10-21	unknown
Sample 978	+	AY.25	15.6217	S	21A (Delta)	0.00535296	1706.1	CA					NextSeq	2021-09-21	unknown
Sample 979	+	AY.25	16.2267	S	21A (Delta)	0.0111408	2021.92	MN					NextSeq	2021-10-21	unknown
Sample 980	+	B.1.617.2	24.5463	S	21A (Delta)	0.0203413	1048.66	ND					NextSeq	2021-09-21	unknown
Sample 981	+	AY.25	16.9048	S	21A (Delta)	0.013717	982.39	MN					NovaSeq	2021-08-21	unknown
Sample 982	+	B.1.526	18.7437	S	20C	0.000903221	1439.72	NJ	35	M	WHITE	NON HISPANIC OR LATINO	NextSeq	2021-04-21	no
Sample 983	+	B.1.1.7	24.3173	S	20I/501Y.V1	0.00274394	995.48	MN	24	F	WHITE	NON HISPANIC OR LATINO	NextSeq	2021-05-21	no
Sample 984	+	B.1.1.7	20.5767	S	20I/501Y.V1	0.00113773	1351.05	MN	64	M	BLACK	NON HISPANIC OR LATINO	NextSeq	2021-04-21	no
Sample 985	+	B.1.427	22.7058	S	20C	0.0233421	1151.02	MN	55	F	WHITE	NON HISPANIC OR LATINO	NextSeq	2021-05-21	no
Sample 986	+	B.1.1.7	21.1758	S	20I/501Y.V1	0.0105742	1080.12	MN	15	M	WHITE	HISPANIC OR LATINO	NextSeq	2021-05-21	no
Sample 987	+	AY.3	24.3357	S	21A (Delta)	0.0145868	2026.93	IA					NovaSeq	2021-10-21	unknown
Sample 988	+	B.1.1.7	21.1775	S	20I/501Y.V1	0.00361397	1346.6	MN	60	M	WHITE	NON HISPANIC OR LATINO	NextSeq	2021-04-21	no
Sample 989	+	B.1.1.7	18.6152	S	20I/501Y.V1	0.00107081	2564.08	NA		NA	NO INFORMATION	NO INFORMATION	NovaSeq	2021-04-21	no
Sample 990	+	B.1.1.7	19.9626	S	20I/501Y.V1	0.0115112	1229.56	MN	28	M	WHITE	NON HISPANIC OR LATINO	NextSeq	2021-05-21	no
Sample 991	+	AY.4	14.5546	S	21A (Delta)	0.00254291	1881.49	MN					NovaSeq	2021-08-21	unknown
Sample 992	+	B.1	28.8637	S	20C	0.434317	280.86	MN	23	F	WHITE	NON HISPANIC OR LATINO	NextSeq	2021-05-21	no
Sample 993	+	AY.12	14.3718	S	21A (Delta)	0.0829542	1207.2	MN					NovaSeq	2021-09-21	unknown
Sample 994	+	AY.26	23.1336	S	21A (Delta)	0.0199732	852.28	NM					NextSeq	2021-09-21	unknown
Sample 995	+		29.1162	S	19A	0.634133	336.65	MN		NA	NO INFORMATION	NO INFORMATION	NextSeq	2021-06-21	no
Sample 996	+	B	27.9598	S	20A	0.131692	286.56	MN					NovaSeq	2021-10-21	unknown
Sample 997	+	AY.3	19.2773	S	21A (Delta)	0.00846437	1978.64	MN					NextSeq	2021-08-21	unknown
Sample 998	+	AY.4	23.1189	S	21A (Delta)	0.00488458	1629.26	MN					NovaSeq	2021-10-21	unknown
Sample 999	+	B.1.1.7	24.8886	S	20I/501Y.V1	0.00261009	2049.94	MN	25	M	WHITE	NON HISPANIC OR LATINO	NovaSeq	2021-05-21	no
Sample 1000	+	B.1.617.2	21.3194	S	21A (Delta)	0.0160254	1532.9	MN					NextSeq	2021-10-21	unknown
Sample 1001	+	B.1.617.2	15.0725	S	21A (Delta)	0.00247574	1565.47	MN					NextSeq	2021-09-21	unknown
Sample 1002	+	B.1.1.7	25.2925	S	20I/501Y.V1	0.0191741	888.74	MN	15	M	WHITE	HISPANIC OR LATINO	NextSeq	2021-04-21	no
Sample 1003	+	AY.5	20.1816	S	21A (Delta)	0.0823187	1923.24	MN					NovaSeq	2021-09-21	unknown
Sample 1004	+	AY.25	23.32	S	21A (Delta)	0.015557	2426.78	MN					NovaSeq	2021-10-21	unknown
Sample 1005	+	AY.34	26.3049	S	21A (Delta)	0.0840915	631.53	MN					NextSeq	2021-10-21	unknown
Sample 1006	+	B.1.1.7	19.1283	S	20I/501Y.V1	0.00237585	2111.86	MN	44	M	OTHER	NON HISPANIC OR LATINO	NovaSeq	2021-05-21	yes
Sample 1007	+	B.1.617.2	23.5198	S	21A (Delta)	0.0333891	637.12	MN					NextSeq	2021-09-21	unknown
Sample 1008	+	B.1.526.2	24.6891	S	20C	0.0592112	746.45	WI	29	M	WHITE	NON HISPANIC OR LATINO	NextSeq	2021-05-21	no
Sample 1009	+	B.1.526.1	20.9128	S	20C	0.053262	1258.95	MN	38	M	OTHER	HISPANIC OR LATINO	NextSeq	2021-05-21	no
Sample 1010	+	B.1.1.7	18.9152	S	20I/501Y.V1	0.00130505	3014.49	MN	51	F	WHITE	NON HISPANIC OR LATINO	NovaSeq	2021-04-21	no
Sample 1011	+	AY.4	13.8355	S	21A (Delta)	0.00244229	1876.93	MN					NextSeq	2021-08-21	unknown
Sample 1012	+	B.1.617.2	22.7002	S	21A (Delta)	0.0184008	1584.49	MN					NextSeq	2021-10-21	unknown
Sample 1013	+	B.1.1.7	25.9327	S	20I/501Y.V1	0.0051198	1917.95	MN	12	M	WHITE	NON HISPANIC OR LATINO	NovaSeq	2021-04-21	no
Sample 1014	+	AY.44	24.0953	S	21A (Delta)	0.241404	345.64						NextSeq	2021-10-21	unknown
Sample 1015	+	B.1.1.7	20.509	S	20I/501Y.V1	0.0605006	1085.78	MN	29	M	WHITE	NON HISPANIC OR LATINO	NextSeq	2021-04-21	no
Sample 1016	+	AY.3	20.1163	S	21A (Delta)	0.0211506	1039.09	MD					NextSeq	2021-10-21	unknown
Sample 1017	+	B.1.617.2	24.6579	S	21A (Delta)	0.0257903	1069.41	MN					NovaSeq	2021-10-21	unknown
Sample 1018	+	B.1.1.519	25.9662	S	20B	0.0251814	887.88	MN	29	M	WHITE	UNKNOWN	NextSeq	2021-04-21	no
Sample 1019	+	B.1.1.7	26.9973	S	20I/501Y.V1	0.134952	1026.5	MN	46	M	WHITE	NON HISPANIC OR LATINO	NovaSeq	2021-04-21	no
Sample 1020	+	Could Not Generate	28.8631	S	20I/501Y.V1	0.657512	310.4	MN	18	F	BLACK	DECLINE TO IDENTIFY	NextSeq	2021-05-21	no
Sample 1021	+	B.1.617.2	20.7426	S	21A (Delta)	0.00729341	1232.37	MN					NextSeq	2021-09-21	unknown
Sample 1022	+	B.1.429	23.0854	S	20C	0.0764137	1119.65	MN	43	M	WHITE	NON HISPANIC OR LATINO	NextSeq	2021-05-21	no
Sample 1023	+	B.1.1.7	14.4588	S	20I/501Y.V1	0.00240932	1503.76	MN	24	M	ASIAN	NON HISPANIC OR LATINO	NextSeq	2021-05-21	yes
Sample 1024	+	B.1.1.7	24.062	S	20I (ALPHA, V1)	0.00291213	1643.6	MN	26	M	WHITE	NON HISPANIC OR LATINO	NovaSeq	2021-05-21	no
Sample 1025	+	B.1.1.7	11.8591	S	20I/501Y.V1	0.00234239	2761.92	MN	11	M	BLACK	NON HISPANIC OR LATINO	NovaSeq	2021-05-21	no
Sample 1026	+	B.1.1.7	18.9607	S	20I/501Y.V1	0.0115446	1337.28	MN	48	F	OTHER	NON HISPANIC OR LATINO	NovaSeq	2021-05-21	no
Sample 1027	+	AY.12	27.4271	S	21A (Delta)	0.0874611	564.59	MN					NextSeq	2021-08-21	unknown
Sample 1028	+	B.1.617.2	20.7196	S	21A (Delta)	0.0036467	920.09	MN					NovaSeq	2021-09-21	unknown
Sample 1029	+	B.1.526.2	25.9772	S	20C	0.00133914	1880.18	NA		NA	NO INFORMATION	NO INFORMATION	NovaSeq	2021-04-21	no
Sample 1030	+	AY.7.1	25.9258	S	21A (Delta)	0.0838574	681.58	MN					NextSeq	2021-10-21	unknown
Sample 1031	+	AY.4	27.2255	S	21A (Delta)	0.055905	1177.68	MN					NovaSeq	2021-10-21	unknown
Sample 1032	+	B.1.1.7	21.3858	S	20I/501Y.V1	0	2595.96	NA		NA	NO INFORMATION	NO INFORMATION	NovaSeq	2021-04-21	no
Sample 1033	+	AY.3	25.5689	S	21A (Delta)	0.0436266	792.84	MN					NextSeq	2021-09-21	unknown
Sample 1034	+	B.1.617.2	21.7756	S	21A (Delta)	0.0847106	1104.71	MN					NextSeq	2021-09-21	unknown
Sample 1035	+	B.1.526	20.3002	S	20C	0.00260931	1452.96	NJ	19	F	DECLINE TO IDENTIFY	NON HISPANIC OR LATINO	NextSeq	2021-04-21	no
Sample 1036	+	B.1.1.7	26.2659	S	20I/501Y.V1	0.00746219	2123.06	MN	10	M	WHITE	DECLINE TO IDENTIFY	NovaSeq	2021-04-21	no
Sample 1037	+	AY.3	23.9621	S	21A (Delta)	0.0145868	2217.82	MN					NovaSeq	2021-09-21	unknown
Sample 1038	+	AY.3	22.5386	S	21A (Delta)	0.0322181	700.42	MN					NovaSeq	2021-09-21	unknown
Sample 1039	+	AY.39	27.064	S	21A (Delta)	0.119347	710.66	MN					NextSeq	2021-10-21	unknown
Sample 1040	+	AY.4	24.5428	S	21A (Delta)	0.101872	485.03	MN					NextSeq	2021-10-21	unknown
Sample 1041	+	B.1.1.7	21.2897	S	20I/501Y.V1	0.00234239	2385.98	MN	34	M	WHITE	NON HISPANIC OR LATINO	NovaSeq	2021-05-21	no
Sample 1042	+	B.1.617.2	27.7749	S	21A (Delta)	0.262584	317.01	TX					NextSeq	2021-09-21	unknown
Sample 1043	+	B.1.617.2	26.9524	S	21A (Delta)	0.00224155	2922.14	MN					NovaSeq	2021-10-21	unknown
Sample 1044	+	B.1.617.2	24.2783	S	21A (Delta)	0.0489796	652.1	MN					NextSeq	2021-08-21	unknown
Sample 1045	+	B.1.429	16.4692	S	20C	0.000401298	3236.17	MN	38	F	WHITE	NON HISPANIC OR LATINO	NovaSeq	2021-04-21	no
Sample 1046	+	B.1.1.7	21.6929	S	20I/501Y.V1	0.034132	795.5	FL	38	F	OTHER	HISPANIC OR LATINO	NextSeq	2021-05-21	no
Sample 1047	+	AY.3	19.3108	S	21A (Delta)	0.0224155	3231.7	MN					NovaSeq	2021-10-21	unknown
Sample 1048	+	B.1.617.2	20.2009	S	21A (Delta)	0.00655606	1412.45	MN					NextSeq	2021-09-21	unknown
Sample 1049	+	B.1.617.2	25.3593	S	21A (Delta)	0.026999	699.6	MN					NovaSeq	2021-08-21	unknown
Sample 1050	+	AY.7.1	22.0657	S	21A (Delta)	0.126305	379.52	NM					NextSeq	2021-10-21	unknown
Sample 1051	+	B.1	28.6418	S	21A (Delta)	0.471743	226.69	CO					NextSeq	2021-09-21	unknown
Sample 1052	+	B.1.1.7	18.9668	S	20I (Alpha, V1)	0.0024445	3013.07	GA					NovaSeq	2021-07-21	unknown
Sample 1053	+	B.1.526	28.1977	S	20C	0.0352925	580.17	NA		NA	NO INFORMATION	NO INFORMATION	NextSeq	2021-04-21	no
Sample 1054	+	AY.3	18.7637	S	21A (Delta)	0.00933423	1579.23	NY					NextSeq	2021-09-21	unknown
Sample 1055	+	AY.4	16.8728	S	21A (Delta)	0.0112078	1075.75	NM					NovaSeq	2021-08-21	unknown
Sample 1056	+	B.1.617.2	15.2917	S	21A (Delta)	0.00264302	2018.28	ID					NextSeq	2021-10-21	unknown
Sample 1057	+	Could Not Generate	28.7245	S	21A (Delta)	0.340702	440.76	MN					NovaSeq	2021-09-21	unknown
Sample 1058	+	B.1.526	17.4067	S	20C	0.00468337	1274.4	NA		NA	NO INFORMATION	NO INFORMATION	NextSeq	2021-04-21	no
Sample 1059	+	AY.25	24.8185	S	21A (Delta)	0.0171629	1300.94	MN					NovaSeq	2021-10-21	unknown
Sample 1060	+	B.1.1.7	19.1118	S	20I/501Y.V1	0.0017066	1105.34	NA		NA	NO INFORMATION	NO INFORMATION	NextSeq	2021-04-21	no
Sample 1061	+	B.1.1.7	22.4802	S	20I/501Y.V1	0.00174006	1159.84	MN	25	M	WHITE	DECLINE TO IDENTIFY	NextSeq	2021-04-21	no
Sample 1062	+	AY.12	29.0984	S	21A (Delta)	0.0894614	489.93	ID					NovaSeq	2021-09-21	unknown
Sample 1063	+	B.1.1.7	12.2385	S	20I/501Y.V1	0.000769643	1082.9	CA	20	M	BLACK	NON HISPANIC OR LATINO	NextSeq	2021-04-21	no
Sample 1064	+	AY.4	20.1548	S	21A (Delta)	0.0191368	903.61	MN					NextSeq	2021-10-21	unknown
Sample 1065	+	AY.3	18.7475	S	21A (Delta)	0.0160254	3469.17	MN					NovaSeq	2021-10-21	unknown
Sample 1066	+	B.1.617.2	21.2038	S	21A (Delta)	0.01151	1063.35	MN					NextSeq	2021-09-21	unknown
Sample 1067	+	B.1.617.2	20.9874	S	21A (Delta)	0.0105041	1012.12	NJ					NovaSeq	2021-08-21	unknown
Sample 1068	+	AY.4	21.1495	S	21A (Delta)	0.0143526	1183.72	MN					NextSeq	2021-10-21	unknown
Sample 1069	+	B.1.1.7	17.4658	S	20I/501Y.V1	0.00237585	2925.42	NA		NA	NO INFORMATION	NO INFORMATION	NovaSeq	2021-04-21	no
Sample 1070	+	B.1.617.2	14.1384	S	21A (Delta)	0.00685848	1212.53	MN					NovaSeq	2021-08-21	unknown
Sample 1071	+	B.1.617.2	24.4829	S	21A (Delta)	0.0133155	885.21	MN					NextSeq	2021-10-21	unknown
Sample 1072	+	B.1.243	27.2744	S	20A	0.0120389	1654.11	MN	59	F	WHITE	NON HISPANIC OR LATINO	NovaSeq	2021-04-21	no
Sample 1073	+	B.1.526.2	23.8698	S	20C	0.0125879	1109.11	NJ	47	F	BLACK	NON HISPANIC OR LATINO	NextSeq	2021-04-21	no
Sample 1074	+	AY.4	23.6176	S	21A (Delta)	0.0393777	943.91	NM					NextSeq	2021-09-21	unknown
Sample 1075	+	B.1.617.2	24.2967	S	21A (Delta)	0.0184343	1449.74	MN					NextSeq	2021-10-21	unknown
Sample 1076	+	AY.25	22.4668	S	21A (Delta)	0.0238876	1209.11	MN					NextSeq	2021-09-21	unknown
Sample 1077	+	B.1.617.2	28.2324	S	21A (Delta)	0.102358	548.78	NJ					NovaSeq	2021-07-21	unknown
Sample 1078	+	AY.25	17.9896	S	21A (Delta)	0.0144865	1179.68	MN					NovaSeq	2021-09-21	unknown
Sample 1079	+	B.1.617.2	19.7079	S	21A (Delta)	0.0088993	1692.09	MN					NextSeq	2021-09-21	unknown
Sample 1080	+	AY.12	22.9099	S	21A (Delta)	0.0215457	1254.66	MN					NextSeq	2021-09-21	unknown
Sample 1081	+	B.1.617.2	16.3963	S	21A (Delta)	0.00234192	2254.71	MN					NovaSeq	2021-09-21	unknown
Sample 1082	+	B.1.617.2	28.5203	S	21A (Delta)	0.104082	505.94						NextSeq	2021-09-21	unknown
Sample 1083	+	AY.12	26.3713	S	21A (Delta)	0.0842588	483.86	MN					NextSeq	2021-08-21	unknown
Sample 1084	+	B.1.1.7	24.0894	S	20I/501Y.V1	0.00662562	868.79	MN	47	M	ASIAN	UNKNOWN	NextSeq	2021-04-21	no
Sample 1085	+	B.1.1.7	26.6703	S	20I/501Y.V1	0.016564	800.99	MN	40	F	WHITE	NON HISPANIC OR LATINO	NextSeq	2021-04-21	no
Sample 1086	+	B.1.617.2	22.89	S	21A (Delta)	0.0191027	1456.2	MN					NextSeq	2021-10-21	unknown
Sample 1087	+	Could Not Generate	18.1739	S	21A (Delta)	0.00234192	2401.18	MN					NovaSeq	2021-09-21	unknown
Sample 1088	+	Could Not Generate	29.7616	S	21A (Delta)	0.347407	293.06	MN					NextSeq	2021-09-21	unknown
Sample 1089	+	Could Not Generate	17.5351	S	21A (Delta)	0.0219137	2222.61	WY					NovaSeq	2021-09-21	unknown
Sample 1090	-	Sample Not Detected	25.0022	S				MN					NextSeq	2021-10-21	unknown
Sample 1091	+	B.1.617.2	22.231	S	21A (Delta)	0.0116761	953.36	MN					NextSeq	2021-08-21	unknown
Sample 1092	+	B.1.1.7	18.8795	S	20I/501Y.V1	0.00153929	1202.01	WV	65	M	WHITE	NON HISPANIC OR LATINO	NextSeq	2021-04-21	no
Sample 1093	+	AY.3.1	18.1644	S	21A (Delta)	0.023553	1421.36	MN					NextSeq	2021-08-21	unknown
Sample 1094	+	A	27.3455	S	21A (Delta)	0.323854	243.5	MN					NextSeq	2021-10-21	unknown
Sample 1095	+	AY.3	24.7961	S	21A (Delta)	0.111375	382.8	MN					NextSeq	2021-10-21	unknown
Sample 1096	+	AY.25	22.6932	S	21A (Delta)	0.0030445	1650.11	NM					NextSeq	2021-10-21	unknown
Sample 1097	+	B.1.1.7	25.4948	S	20I/501Y.V1	0.000970419	2205.46	NA		NA	NO INFORMATION	NO INFORMATION	NovaSeq	2021-04-21	no
Sample 1098	+	AY.39	24.4631	S	21A (Delta)	0.0386417	1083.85	NM					NextSeq	2021-10-21	unknown
Sample 1099	+	B.1.617.2	29.4584	S	21A (Delta)	0.118243	531.62	MN					NextSeq	2021-08-21	unknown
Sample 1100	+	B.1.1.7	23.164	S	20I/501Y.V1	0.00113773	2383.19	NA		NA	NO INFORMATION	NO INFORMATION	NovaSeq	2021-04-21	unknown
Sample 1101	+	B.1.1.519	20.5532	S	20B	0.00160519	1491.3	NA		NA	NO INFORMATION	NO INFORMATION	NextSeq	2021-04-21	no
Sample 1102	+	B.1.1.7	22.3104	S	20I/501Y.V1	0.00876723	1275.13	TX	36	F	WHITE	NON HISPANIC OR LATINO	NextSeq	2021-04-21	no
Sample 1103	+	AY.4	16.2544	S	21A (Delta)	0.0478994	1661.08	MN					NextSeq	2021-08-21	unknown
Sample 1104	+	B.1.1.7	19.0277	S	20I/501Y.V1	0.000803105	1386.11	MN	49	M	WHITE	NON HISPANIC OR LATINO	NextSeq	2021-04-21	no
Sample 1105	+	B.1.617.2	16.6589	S	21A (Delta)	0.0104048	1669.34	NM					NextSeq	2021-10-21	unknown
Sample 1106	+	B.1.429	19.4371	S	20C	0.0213278	1209.86	MN	35	F	WHITE	NON HISPANIC OR LATINO	NextSeq	2021-04-21	no
Sample 1107	+	B.1.1.7	25.5765	S	20I/501Y.V1	0.179641	404.17	MN	29	M	WHITE	HISPANIC OR LATINO	NextSeq	2021-05-21	no
Sample 1108	+	B.1.1.7	19.1448	S	20I/501Y.V1	0.000301165	2837.72	MN	22	F	OTHER	HISPANIC OR LATINO	NovaSeq	2021-04-21	no
Sample 1109	+	AY.44	24.2249	S	21A (Delta)	0.0369949	977.85	MN					NextSeq	2021-10-21	unknown
Sample 1110	+	AY.3	22.5661	S	21A (Delta)	0.012546	1633.26	MN					NextSeq	2021-09-21	unknown
Sample 1111	+	B.1.1.7	22.4275	S	20I/501Y.V1	0.0166979	1207.08	MN	46	M	OTHER	HISPANIC OR LATINO	NextSeq	2021-05-21	no
Sample 1112	+	B.1.526	21.9779	S	20C	0.00150537	1009.23	NJ	7	F	WHITE	NON HISPANIC OR LATINO	NextSeq	2021-04-21	no
Sample 1113	+	B.1.1.7	28.7769	S	20I/501Y.V1	0.113874	1050.32	MN	37	M	WHITE	NON HISPANIC OR LATINO	NovaSeq	2021-04-21	no
Sample 1114	+	AY.25	12.895	S	21A (Delta)	0.00863165	1465.81	WY					NextSeq	2021-09-21	unknown
Sample 1115	+	B.1.617.2	17.7351	S	21A (Delta)	0.00250945	3202.74	MN					NovaSeq	2021-10-21	unknown
Sample 1116	+	AY.12	25.7122	S	21A (Delta)	0.109747	531.37	MN					NextSeq	2021-08-21	unknown
Sample 1117	+	AY.3	27.5058	S	21A (Delta)	0.0219464	1483.89	MN					NovaSeq	2021-10-21	unknown
Sample 1118	+	Could Not Generate	29.5154	S	21A (Delta)	0.0944273	646.56	NJ	44	F			NextSeq	2021-09-21	unknown
Sample 1119	+	Could Not Generate	25.4108	S	20I/501Y.V1	0.669755	318.69	MN	31	F	WHITE	DECLINE TO IDENTIFY	NextSeq	2021-04-21	no
Sample 1120	+	AY.21	22.9355	S	21A (Delta)	0.0215457	719.6	MN					NovaSeq	2021-09-21	unknown
Sample 1121	+	B.1.429	22.4832	S	20C	0.000434652	3318.03	MN	31	F	WHITE	NON HISPANIC OR LATINO	NovaSeq	2021-04-21	no
Sample 1122	+	AY.12	25.8681	S	21A (Delta)	0.0823352	398.21	AL					NovaSeq	2021-09-21	unknown
Sample 1123	+	AY.4	17.529	S	21A (Delta)	0.0206424	1726.18	MN					NovaSeq	2021-10-21	unknown
Sample 1124	+	B.1.1.7	13.3061	S	20I/501Y.V1	0.002242	3118.47	MN	37	F	BLACK	NON HISPANIC OR LATINO	NovaSeq	2021-05-21	no
Sample 1125	+	AY.12	16.5575	S	21A (Delta)	0.0028103	1492.45	MN					NovaSeq	2021-08-21	unknown
Sample 1126	+	Could Not Generate	21.1954	S	21A (Delta)	0.00552024	1559.14	MN					NextSeq	2021-09-21	unknown
Sample 1127	+	B.1.1.7	16.1279	S	20I (ALPHA, V1)	0.00244278	1375.73	MN	24	M	BLACK	NON HISPANIC OR LATINO	NovaSeq	2021-06-21	no
Sample 1128	+	AY.25	27.5543	S	21A (Delta)	0.0902978	605.08	MN					NovaSeq	2021-09-21	unknown
Sample 1129	+	AY.34	29.9438	S	21A (Delta)	0.11171	625.96	MN					NovaSeq	2021-10-21	unknown
Sample 1130	+	B.1.1.7	26.8869	S	20I/501Y.V1	0.00127158	2533.82	MN	58	F	ASIAN	DECLINE TO IDENTIFY	NovaSeq	2021-04-21	no
Sample 1131	+	AY.39	25.4482	S	21A (Delta)	0.063466	594.48	NM					NextSeq	2021-10-21	unknown
Sample 1132	+	B.1.617.2	17.5968	S	21A (Delta)	0.0131817	993.55	MN					NovaSeq	2021-08-21	unknown
Sample 1133	+	B.1.1.7	15.7128	S	20I/501Y.V1	0.000234239	3263.85	MN	57	M	WHITE	NON HISPANIC OR LATINO	NovaSeq	2021-04-21	yes
Sample 1134	+	AY.4	26.8868	S	21A (Delta)	0.145266	384.64	MN					NextSeq	2021-10-21	unknown
Sample 1135	+	B.1.1.7	24.6666	S	20I/501Y.V1	0.0742872	404.18	MN	25	M	WHITE	DECLINE TO IDENTIFY	NextSeq	2021-04-21	no
Sample 1136	+	B.1.617.2	23.9737	S	21A (Delta)	0.151626	294.63	SC					NextSeq	2021-08-21	unknown
Sample 1137	+	B.1.429	21.8198	S	20C	0.0337135	601.19	MN	17	M	BLACK	NON HISPANIC OR LATINO	NextSeq	2021-04-21	no
Sample 1138	+	B.1.1.519	20.4408	S	20B	0.0031435	1279.05	MN	24	F	WHITE	NON HISPANIC OR LATINO	NextSeq	2021-05-21	no
Sample 1139	+	B.1.1.7	19.602	S	20I/501Y.V1	0.00324588	1904.02	MN	22	F	BLACK	NON HISPANIC OR LATINO	NovaSeq	2021-05-21	no
Sample 1140	+	B.1.617.2	16.6089	S	21A (Delta)	0.0111408	1577.66	MN					NovaSeq	2021-09-21	unknown
Sample 1141	+	B.1.1.7	14.6053	S	20I/501Y.V1	0.00157275	1230.65	MN	56	M	WHITE	NON HISPANIC OR LATINO	NextSeq	2021-04-21	no
Sample 1142	+	AY.33	29.5316	S	21A (Delta)	0.449057	249.54	MN					NovaSeq	2021-10-21	unknown
Sample 1143	+	B.1.617.2	20.8717	S	21A (Delta)	0.00254342	1868.04	MN					NovaSeq	2021-07-21	unknown
Sample 1144	+	B.1.526.2	21.6437	S	20C	0.00291262	1434.49	MN	46	M	WHITE	DECLINE TO IDENTIFY	NextSeq	2021-04-21	no
Sample 1145	-	Sample Not Detected	22.9776	S				MN					NextSeq	2021-10-21	unknown
Sample 1146	+	AY.12	16.3825	S	21A (Delta)	0.00371362	1388.46	CA					NextSeq	2021-08-21	unknown
Sample 1147	+	B.1.1.7	26.5961	S	20I/501Y.V1	0.0342324	470.55	MN	17	F	ASIAN	NON HISPANIC OR LATINO	NextSeq	2021-04-21	no
Sample 1148	+	B.1.617.2	13.1976	S	21A (Delta)	0.00244229	1842.92						NextSeq	2021-09-21	unknown
Sample 1149	+	B.1.617.2	21.6548	S	21A (Delta)	0.00274312	1436.16	MN					NextSeq	2021-08-21	unknown
Sample 1150	+	AY.4	25.4486	S	21A (Delta)	0.0746069	520.98	MN					NextSeq	2021-10-21	unknown
Sample 1151	+	R.1	26.3299	S	20B	0.0317704	1138.43	NJ	33	M	BLACK	NO INFORMATION	NextSeq	2021-04-21	no
Sample 1152	+	AY.12	23.0807	S	21A (Delta)	0.060299	544.74	MN					NextSeq	2021-08-21	unknown
Sample 1153	+	A	27.4804	S	21A (Delta)	0.469981	295.31						NovaSeq	2021-09-21	unknown
Sample 1154	+	AY.25	19.6335	S	21A (Delta)	0.0147876	1302.94	MN					NextSeq	2021-10-21	unknown
Sample 1155	+	AY.25	22.7233	S	21A (Delta)	0.075863	1079.02	MN					NextSeq	2021-10-21	unknown
Sample 1156	+	Could Not Generate	26.8565	S	21A (Delta)	0.0654734	926.55	MN					NovaSeq	2021-09-21	unknown
Sample 1157	+	Could Not Generate	29.6756	S	21A (Delta)	0.188654	349.87						NovaSeq	2021-09-21	unknown
Sample 1158	+	P.1	18.8966	S	20J (Gamma, V3)	0.00237474	3052.98	MN					NovaSeq	2021-07-21	unknown
Sample 1159	+	B.1.617.2	21.621	S	21A (Delta)	0.0189147	1348.77	MN					NextSeq	2021-10-21	unknown
Sample 1160	+	Could Not Generate	25.0228	S	21A (Delta)	0.00926731	2063.91	MN					NovaSeq	2021-09-21	unknown
Sample 1161	+	AY.25	23.2411	S	21A (Delta)	0.0388759	854.36	MN					NovaSeq	2021-09-21	unknown
Sample 1162	+	B.1.1.7	27.118	S	20I/501Y.V1	0.0772989	626.64	MN	59	F	WHITE	UNKNOWN	NextSeq	2021-05-21	no
Sample 1163	+	AY.15	13.1579	S	21A (Delta)	0.00274339	1385.48	WY					NovaSeq	2021-09-21	unknown
Sample 1164	+	B.1.1.7	28.9973	S		0.257658	587.26	MI	36	NA	DECLINE TO IDENTIFY	DECLINE TO IDENTIFY	NovaSeq	2021-04-21	unknown
Sample 1165	+	B.1.1.7	28.7403	S	20I/501Y.V1	0.346135	630.34	MN	5	M	WHITE	NON HISPANIC OR LATINO	NextSeq	2021-05-21	no
Sample 1166	+	AY.3	25.4116	S	21A (Delta)	0.0641017	489.07	NM					NovaSeq	2021-08-21	unknown
Sample 1167	+	AY.20	12.1415	S	21A (Delta)	0.011375	1248.16	MN					NovaSeq	2021-10-21	unknown
Sample 1168	-	Sample Not Detected	23.2457	S				PA					NextSeq	2021-10-21	unknown
Sample 1169	+	AY.25	22.4643	S	21A (Delta)	0.0270451	820.62	ID					NextSeq	2021-10-21	unknown
Sample 1170	+	P.1	21.9777	S	20J/501Y.V3	0.0102348	1292.87	NA		NA	NO INFORMATION	NO INFORMATION	NextSeq	2021-04-21	no
Sample 1171	+	B	27.9195	S	21A (Delta)	0.201858	997.67	MN					NovaSeq	2021-10-21	unknown
Sample 1172	+	AY.12	19.5873	S	21A (Delta)	0.0115089	1035.3	MN					NovaSeq	2021-08-21	unknown
Sample 1173	+	B.1.1.7	23.3136	S	20I/501Y.V1	0.00254317	2117.8	MN	51	F	WHITE	NON HISPANIC OR LATINO	NovaSeq	2021-05-21	yes
Sample 1174	+	B.1.1.7	11.9141	S	20I/501Y.V1	0.00247624	1617.14	MN	54	M	WHITE	UNKNOWN	NextSeq	2021-05-21	no
Sample 1175	-	Sample Not Detected	19.6581	S				NJ	19	M	BLACK	UNKNOWN	NextSeq	2021-04-21	no
Sample 1176	-	Sample Not Detected	27.0131	S				OH	22	F	WHITE	NON HISPANIC OR LATINO	NextSeq	2021-04-21	no
Sample 1177	+	B.1.1.7	23.4731	S	20I/501Y.V1	0.0189399	893.16	MN	13	M	WHITE	HISPANIC OR LATINO	NextSeq	2021-05-21	no
Sample 1178	+	B.1.1.7	25.8634	S	20I/501Y.V1	0.0207804	1735.39	MN	42	M	OTHER	HISPANIC OR LATINO	NovaSeq	2021-04-21	no
Sample 1179	+	AY.12	20.4858	S	21A (Delta)	0.0155236	1288.05	NJ					NovaSeq	2021-09-21	unknown
Sample 1180	+	AY.33	29.4597	S	21A (Delta)	0.174005	528.8	MN					NextSeq	2021-10-21	unknown
Sample 1181	+	B.1.1.7	24.164	S	20I/501Y.V1	0.00665908	512.55	MN	49	M	WHITE	NON HISPANIC OR LATINO	NextSeq	2021-04-21	no
Sample 1182	+	B.1.1.7	27.178	S	20I/501Y.V1	0.30247	264.07	MN	33	M	WHITE	NON HISPANIC OR LATINO	NextSeq	2021-04-21	no
Sample 1183	+	B.1.1.7	26.3745	S	20I/501Y.V1	0.0537077	867.56	MN	15	M	WHITE	DECLINE TO IDENTIFY	NextSeq	2021-04-21	yes
Sample 1184	+	B.1.429	24.368	S	20C	0.0393685	535.7	TX	8	F	WHITE	NON HISPANIC OR LATINO	NextSeq	2021-04-21	no
Sample 1185	-	Sample Not Detected	28.3142	S				MN					NovaSeq	2021-10-21	unknown
Sample 1186	+	B.1.617.2	27.7633	S	21A (Delta)	0.00933423	1048.26	WV					NovaSeq	2021-09-21	unknown
Sample 1187	+	A	29.4743	S	20A	0.486809	169.06	MN					NextSeq	2021-10-21	unknown
Sample 1188	+	AY.25	22.0853	S	21A (Delta)	0.0230512	1247.91	MN					NextSeq	2021-10-21	unknown
Sample 1189	+	B.1.1.7	24.3091	S	20I/501Y.V1	0.0105742	809.37	MN	15	M	ASIAN	DECLINE TO IDENTIFY	NextSeq	2021-04-21	no
Sample 1190	+	AY.3	18.9368	S	21A (Delta)	0.0235865	1699.71	MN					NextSeq	2021-10-21	unknown
Sample 1191	+	Could Not Generate	29.3405	S	20A	0.397198	289.7						NovaSeq	2021-09-21	unknown
Sample 1192	+	AY.4	18.4577	S	21A (Delta)	0.00368016	1262.3	NJ					NextSeq	2021-09-21	unknown
Sample 1193	+	Could Not Generate	29.8464	S	21A (Delta)	0.244442	297.84						NextSeq	2021-09-21	unknown
Sample 1194	+	AY.4	22.0297	S	21A (Delta)	0.0464369	665.83	MN					NextSeq	2021-10-21	unknown
Sample 1195	+	B.1.1.7	25.7264	S	20I/501Y.V1	0.00896801	889.61	MN	41	M	WHITE	NON HISPANIC OR LATINO	NextSeq	2021-04-21	no
Sample 1196	+	B.1.1.7	20.5171	S	20I/501Y.V1	0.0188395	1295.23	MN	13	F	DECLINE TO IDENTIFY	DECLINE TO IDENTIFY	NextSeq	2021-05-21	no
Sample 1197	+	AY.4	21.7204	S	21A (Delta)	0.0104383	1106.79	ID					NextSeq	2021-09-21	unknown
Sample 1198	+	AY.3	27.521	S	21A (Delta)	0.0329343	937.8	MN					NovaSeq	2021-10-21	unknown
Sample 1199	+	AY.3	28.9643	S	21A (Delta)	0.0378362	816.01	MN					NextSeq	2021-10-21	unknown
Sample 1200	+	AY.20	25.8327	S	21A (Delta)	0.0183004	1662.64	MN					NovaSeq	2021-10-21	unknown
Sample 1201	+	B.1.351	25.2925	S	20H (BETA, V2)	0.0110758	1128.98	NM	61	M	WHITE	NON HISPANIC OR LATINO	NovaSeq	2021-06-21	yes
Sample 1202	+	AY.3	25.406	S	21A (Delta)	0.0370023	839.46	MN					NextSeq	2021-10-21	unknown
Sample 1203	+	B.1.1.7	19.5818	S	20I (ALPHA, V1)	0.00254317	1621.68	WI	51	M	WHITE	NON HISPANIC OR LATINO	NovaSeq	2021-06-21	no
Sample 1204	+	AY.23	24.2949	S	21A (Delta)	0.114923	418.96	VA					NovaSeq	2021-10-21	unknown
Sample 1205	+	B.1.617.2	26.1563	S	21A (Delta)	0.0299431	806.88	MN					NextSeq	2021-10-21	unknown
Sample 1206	+	AY.4	19.7802	S	21A (Delta)	0.00247574	1660.65	MN					NextSeq	2021-10-21	unknown
Sample 1207	+	AY.12	13.2473	S	21A (Delta)	0.0112503	1704.59	MN					NextSeq	2021-09-21	unknown
Sample 1208	+	AY.25	24.8554	S	21A (Delta)	0.0415189	640.36	MN					NextSeq	2021-08-21	unknown
Sample 1209	+	B.1.1.7	23.2216	S	20I (ALPHA, V1)	0.00297818	1327.25	MN	78	F	WHITE	NON HISPANIC OR LATINO	NovaSeq	2021-06-21	no
Sample 1210	+	B.1.1.7	21.87	S	20I/501Y.V1	0.0017066	1388.06	MN	18	F	WHITE	NON HISPANIC OR LATINO	NextSeq	2021-04-21	no
Sample 1211	+	P.1	25.2897	S	20J/501Y.V3	0.0383638	753.36	MN	39	F	WHITE	NON HISPANIC OR LATINO	NextSeq	2021-04-21	no
Sample 1212	+	Could Not Generate	26.2366	S	21A (Delta)	0.0181332	1849.81	MN					NovaSeq	2021-09-21	unknown
Sample 1213	+	AY.3	18.7475	S	21A (Delta)	0.00260957	2436.93	MN					NovaSeq	2021-10-21	unknown
Sample 1214	+	B.1.1.7	23.5069	S	20I/501Y.V1	0.00257663	1501.08	MN	45	F	WHITE	NON HISPANIC OR LATINO	NovaSeq	2021-05-21	no
Sample 1215	+	B.1.1.7	25.2277	S	20I/501Y.V1	0.000836568	2359.28	MN	25	F	WHITE	UNKNOWN	NovaSeq	2021-04-21	no
Sample 1216	+	B.1.617.2	23.5132	S	21A (Delta)	0.0751714	561.19	MN					NextSeq	2021-09-21	unknown
Sample 1217	+	B.1.617.2	19.0872	S	21A (Delta)	0.017464	1282.32	MN					NextSeq	2021-10-21	unknown
Sample 1218	+	B.1.1.7	22.1311	S	20I/501Y.V1	0.00542096	1792.7	MN	5	M	WHITE	NON HISPANIC OR LATINO	NovaSeq	2021-05-21	no
Sample 1219	+	AY.4	17.5424	S	21A (Delta)	0.00224155	2577.53	MN					NovaSeq	2021-10-21	unknown
Sample 1220	+	AY.12	20.2072	S	21A (Delta)	0.00267648	1428.78	MN					NextSeq	2021-08-21	unknown
Sample 1221	+	AY.3.1	24.2482	S	21A (Delta)	0.0601298	529.1	OH					NovaSeq	2021-09-21	unknown
Sample 1222	+	B.1.617.2	26.0632	S	21A (Delta)	0.023553	1071.01	MN					NovaSeq	2021-09-21	unknown
Sample 1223	+	AY.3.1	20.3551	S	21A (Delta)	0.0318156	1185.32	OH					NovaSeq	2021-09-21	unknown
Sample 1224	+	B.1.1.7	28.9069	S	20I/501Y.V1	0.456613	431.37	MN	48	M	WHITE	NON HISPANIC OR LATINO	NextSeq	2021-04-21	no
Sample 1225	+	B.1.1.7	22.4385	S	20I (ALPHA, V1)	0.00414938	995.2	MN	24	M	WHITE	NON HISPANIC OR LATINO	NextSeq	2021-06-21	no
Sample 1226	+	Could Not Generate	29.2767	S	20A	0.583186	157.94						NextSeq	2021-08-21	unknown
Sample 1227	+	B.1.1.7	13.8517	S	20I/501Y.V1	0.00267702	1237.49	MN	27	M	ASIAN	NON HISPANIC OR LATINO	NextSeq	2021-04-21	no
Sample 1228	+	AY.24	24.6354	S	21A (Delta)	0.0190718	1173.17	MN					NextSeq	2021-10-21	unknown
Sample 1229	+	B.1.1.519	27.8799	S	20B	0.0381901	776.18	MN	20	M	WHITE	HISPANIC OR LATINO	NextSeq	2021-04-21	no
Sample 1230	+	B.1.617.2	21.9987	S	21A (Delta)	0.00866511	1287.11	MN					NovaSeq	2021-09-21	unknown
Sample 1231	+	Could Not Generate	22.7753	S	21A (Delta)	0.0175309	1030.97	MN					NextSeq	2021-09-21	unknown
Sample 1232	+	AY.3	28.0663	S	21A (Delta)	0.0480094	1046.01	NJ					NextSeq	2021-08-21	unknown
Sample 1233	+	AY.4	23.6318	S	21A (Delta)	0.0520241	552.42	MN					NextSeq	2021-10-21	unknown
Sample 1234	+	B.1.1.7	25.9964	S	20I/501Y.V1	0.0322386	602.82	WV	52	M	WHITE	NON HISPANIC OR LATINO	NextSeq	2021-04-21	no
Sample 1235	+	B.1.1.7	17.4823	S	20I/501Y.V1	0.0563178	1320	MN	15	M	ASIAN	UNKNOWN	NextSeq	2021-05-21	no
Sample 1236	+	AY.3.1	22.7142	S	21A (Delta)	0.0445619	829.09	OH					NovaSeq	2021-09-21	unknown
Sample 1237	+	B.1.1.7	24.8766	S	20I/501Y.V1	0.00234239	2030.77	MN	13	M	WHITE	NON HISPANIC OR LATINO	NovaSeq	2021-05-21	no
Sample 1238	+	B.1.1.519	20.4729	S	20B	0.000836037	1708.47	MN	22	F	WHITE	NON HISPANIC OR LATINO	NextSeq	2021-04-21	no
Sample 1239	+	P.1	21.3394	S	20J/501Y.V3	0.0108714	870.7	MN	49	F	WHITE	UNKNOWN	NextSeq	2021-04-21	no
Sample 1240	+	B.1.617.2	16.7066	S	21A (Delta)	0.00267648	1366.63	MN					NovaSeq	2021-08-21	unknown
Sample 1241	+	Could Not Generate	24.8926	S	21A (Delta)	0.0133155	950.87	MN					NextSeq	2021-09-21	unknown
Sample 1242	+	B.1.617.2	23.4397	S	21A (Delta)	0.0226832	941.97	MN					NextSeq	2021-07-21	unknown
Sample 1243	+	AY.12	29.0711	S	21A (Delta)	0.181198	278.6	MN					NovaSeq	2021-08-21	unknown
Sample 1244	+	B.1.1.7	23.5442	S	20I/501Y.V1	0.00150582	1297.06	NY	61	M	ASIAN	NO INFORMATION	NextSeq	2021-04-21	no
Sample 1245	+	B.1.1.7	27.7619	S	20I/501Y.V1	0.0239928	1085.64	MN	2	M	BLACK	NON HISPANIC OR LATINO	NextSeq	2021-05-21	no
Sample 1246	+	B.1.617.2	22.8208	S	21A (Delta)	0.021278	930.83	MN					NovaSeq	2021-10-21	unknown
Sample 1247	+	AY.25	13.8744	S	21A (Delta)	0.00712613	1770.04	MN					NextSeq	2021-10-21	unknown
Sample 1248	+	AY.4	21.8556	S	21A (Delta)	0.0279692	982.02	MN					NextSeq	2021-10-21	unknown
Sample 1249	+	AY.4	13.3322	S	21A (Delta)	0.0549348	589.09	MN					NextSeq	2021-09-21	unknown
Sample 1250	+	B.1.1.7	15.1424	S	20I/501Y.V1	0.0752577	2604.46	MN	24	M	ASIAN	NON HISPANIC OR LATINO	NextSeq	2021-05-21	yes
Sample 1251	+	B.1	28.019	S	21A (Delta)	0.460255	401.16	MN					NovaSeq	2021-07-21	unknown
Sample 1252	+	B.1.1.7	21.7317	S	20I (ALPHA, V1)	0.00261009	1704.58	MN	28	F	ASIAN	DECLINE TO IDENTIFY	NovaSeq	2021-06-21	no
Sample 1253	+	B.1.617	14.4293	S	20A	0.00853128	1682.95	MN	68	F	ASIAN	NON HISPANIC OR LATINO	NextSeq	2021-04-21	no
Sample 1254	+	B.1.617.2	20.6052	S	21A (Delta)	0.0270334	1147.71	MN					NextSeq	2021-10-21	unknown
Sample 1255	+	Could Not Generate	23.0022	S	21A (Delta)	0.0165942	1521.99	MN					NextSeq	2021-09-21	unknown
Sample 1256	+	AY.39	26.7436	S	21A (Delta)	0.0622951	1001.14	MN					NovaSeq	2021-10-21	unknown
Sample 1257	+	B.1.1.7	23.3737	S	20I/501Y.V1	0.00291126	1202.79	NA		NA	NO INFORMATION	NO INFORMATION	NextSeq	2021-05-21	no
Sample 1258	+	AY.25	19.4078	S	21A (Delta)	0.0122449	1581.79	MN					NextSeq	2021-10-21	unknown
Sample 1259	+	AY.39	26.2464	S	21A (Delta)	0.0671722	590.98	MN					NovaSeq	2021-10-21	unknown
Sample 1260	+	AY.15	26.0344	S	21A (Delta)	0.134627	448.63	CA					NextSeq	2021-09-21	unknown
Sample 1261	+	B.1.617.2	13.8959	S	21A (Delta)	0.00224155	3279.42	MN					NovaSeq	2021-10-21	unknown
Sample 1262	+	AY.25	20.265	S	21A (Delta)	0.0142188	1323.69	MN					NextSeq	2021-09-21	unknown
Sample 1263	+	Could Not Generate	27.8449	S	20A	0.527802	218.39	MN					NextSeq	2021-10-21	unknown
Sample 1264	+	B.1.526	22.6771	S	20C	0.00110394	2759.48	NA		NA	NO INFORMATION	NO INFORMATION	NovaSeq	2021-04-21	no
Sample 1265	+	B.1.617.2	15.2476	S	21A (Delta)	0.00709267	1618.66	MN					NextSeq	2021-10-21	unknown
Sample 1266	+	B.1.427	26.3235	S	20C	0.0274554	768.8	MN	38	M	OTHER	HISPANIC OR LATINO	NextSeq	2021-05-21	yes
Sample 1267	+	AY.3	23.9479	S	21A (Delta)	0.0138508	1095.79	WY					NextSeq	2021-08-21	unknown
Sample 1268	+	AY.4	25.1617	S	21A (Delta)	0.0280111	602.64	MN					NovaSeq	2021-08-21	unknown
Sample 1269	+	B.1.1.519	24.1464	S	20B	0.00240779	895.41	MN	7	M	DECLINE TO IDENTIFY	DECLINE TO IDENTIFY	NextSeq	2021-04-21	no
Sample 1270	+	AY.4	22.9574	S	21A (Delta)	0.00398126	1055.56	MN					NextSeq	2021-09-21	unknown
Sample 1271	+	AY.3	21.4853	S	21A (Delta)	0.0104048	1744.25	MN					NextSeq	2021-10-21	unknown
Sample 1272	+	Could Not Generate	26.2863	S	21A (Delta)	0.0139512	956.53	WV					NextSeq	2021-09-21	unknown
Sample 1273	+	Could Not Generate	24.928	S	21A (Delta)	0.505083	497.71	MN					NextSeq	2021-10-21	unknown
Sample 1274	+	B.1.617.2	19.9249	S	21A (Delta)	0.00441501	2415.36	CA					NovaSeq	2021-09-21	unknown
Sample 1275	+	B.1.429	23.8904	S	20C	0.01856	818.88	ID	36	U	DECLINE TO IDENTIFY	DECLINE TO IDENTIFY	NextSeq	2021-04-21	no
Sample 1276	+	AY.3	22.2507	S	21A (Delta)	0.054366	587.4						NextSeq	2021-10-21	unknown
Sample 1277	+	Could Not Generate	27.6479	S	21A (Delta)	0.122014	681.87	PA					NovaSeq	2021-09-21	unknown
Sample 1278	+	B.1.429	13.4193	S	20C	0.000902919	1584.26	MN	49	F	WHITE	NON HISPANIC OR LATINO	NextSeq	2021-04-21	no
Sample 1279	+	B.1.617.2	18.1276	S	21A (Delta)	0.0217799	1185.49	MN					NextSeq	2021-09-21	unknown
Sample 1280	+	AY.23	25.4764	S	21A (Delta)	0.24944	1122.24	WI					NovaSeq	2021-09-21	unknown
Sample 1281	+	B.1.1.7	11.6835	S	20I/501Y.V1	0.000535404	3212.83	MN	50	M	WHITE	DECLINE TO IDENTIFY	NovaSeq	2021-04-21	no
Sample 1282	+	AY.25	26.0622	S	21A (Delta)	0.0385748	961.46	MN					NextSeq	2021-10-21	unknown
Sample 1283	+	B.1.617.2	27.6897	S	21A (Delta)	0.00267648	1497.1						NovaSeq	2021-09-21	unknown
Sample 1284	+	AY.4	24.1297	S	21A (Delta)	0.0366343	1507.89	MN					NovaSeq	2021-10-21	unknown
Sample 1285	+	AY.4	25.8313	S	21A (Delta)	0.0328472	1340.65	NM					NovaSeq	2021-09-21	unknown
Sample 1286	+	AY.3.1	23.6781	S	21A (Delta)	0.021478	1384.44	WY					NovaSeq	2021-09-21	unknown
Sample 1287	+	AY.7.1	25.3225	S	21A (Delta)	0.0778265	593.45	MN					NextSeq	2021-10-21	unknown
Sample 1288	+	AY.3	14.4299	S	21A (Delta)	0.0177317	1297.47	MN					NovaSeq	2021-10-21	unknown
Sample 1289	+	AY.26	28.6903	S	21A (Delta)	0.134199	1062.36	MN					NovaSeq	2021-10-21	unknown
Sample 1290	+	AY.25	20.3516	S	21A (Delta)	0.00341251	2008.08	WY					NovaSeq	2021-09-21	unknown
Sample 1291	+	B.1.1.7	28.7833	S	20I (ALPHA, V1)	0.0330612	1031.67	MN	27	F	ASIAN	NON HISPANIC OR LATINO	NovaSeq	2021-06-21	no
Sample 1292	+	B.1.526	26.127	S	20C	0.00816245	2108.35	MN	23	F	WHITE	NON HISPANIC OR LATINO	NovaSeq	2021-04-21	no
Sample 1293	+	AY.12	27.331	S	21A (Delta)	0.184306	315.46						NovaSeq	2021-09-21	unknown
Sample 1294	+	AY.25	15.6831	S	21A (Delta)	0.00244229	1980.92	MN					NextSeq	2021-09-21	unknown
Sample 1295	-	Sample Not Detected	28.2399	S				MN	8	M	WHITE	NON HISPANIC OR LATINO	NovaSeq	2021-06-21	no
Sample 1296	+	AY.25	24.5637	S	21A (Delta)	0.0252877	676.69	MN					NovaSeq	2021-09-21	unknown
Sample 1297	+	B.1.1.7	25.6577	S	20I/501Y.V1	0.115313	669.83	MN	21	F	ASIAN	NON HISPANIC OR LATINO	NextSeq	2021-04-21	no
Sample 1298	+	B.1.526	25.6972	S	20C	0.0588767	530.12	NJ	34	M	WHITE	DECLINE TO IDENTIFY	NextSeq	2021-04-21	no
Sample 1299	+	B.1.1.7	13.9316	S	20I/501Y.V1	0.000234239	3277.9	MN	24	M	WHITE	NON HISPANIC OR LATINO	NovaSeq	2021-04-21	no
Sample 1300	+	B.1.1.7	25.8896	S	20I/501Y.V1	0.0114443	877.68	NJ	23	F	BLACK	UNKNOWN	NextSeq	2021-04-21	yes
Sample 1301	+	AY.3.1	22.0857	S	21A (Delta)	0.0158236	1560.8	OH					NextSeq	2021-09-21	unknown
Sample 1302	+	B.1.617.2	15.2569	S	21A (Delta)	0.0112078	1525.82	MN					NextSeq	2021-10-21	unknown
Sample 1303	+	B.1.1.7	27.5458	S	20I (ALPHA, V1)	0.448671	404.32	NA		NA	NO INFORMATION	NO INFORMATION	NovaSeq	2021-06-21	unknown
Sample 1304	+	B.1.617.2	27.8875	S	21A (Delta)	0.0183004	2195.71	MN					NovaSeq	2021-10-21	unknown
Sample 1305	+	AY.4	22.1175	S	21A (Delta)	0.0179324	1267.67	MN					NextSeq	2021-10-21	unknown
Sample 1306	+	AY.4	17.4367	S	21A (Delta)	0.00224155	3046.52	MN					NovaSeq	2021-10-21	unknown
Sample 1307	+	B.1.1.7	20.9884	S	20I/501Y.V1	0.00759604	766.27	MN	63	F	WHITE	DECLINE TO IDENTIFY	NextSeq	2021-04-21	no
Sample 1308	+	AY.25	21.1798	S	21A (Delta)	0.00883239	3124.61	MN					NovaSeq	2021-10-21	unknown
Sample 1309	+	B.1.526	22.8833	S	20C	0.00163918	1111.12	WI	28	M	WHITE	NON HISPANIC OR LATINO	NextSeq	2021-04-21	no
Sample 1310	+	AY.3	22.7824	S	21A (Delta)	0.00792907	2720.9	MN					NovaSeq	2021-10-21	unknown
Sample 1311	+	AY.4	25.656	S	21A (Delta)	0.0534627	724.6	MN					NextSeq	2021-10-21	unknown
Sample 1312	+	AY.12	22.1912	S	21A (Delta)	0.0801513	537.97	NJ					NextSeq	2021-08-21	unknown
Sample 1313	+	B.1.1.7	21.3048	S	20I/501Y.V1	0.0598694	1267.37	MN	39	M	WHITE	NON HISPANIC OR LATINO	NextSeq	2021-05-21	no
Sample 1314	+	AY.25	28.1103	S	21A (Delta)	0.242206	262.54	MN					NextSeq	2021-09-21	unknown
Sample 1315	+	AY.39	25.8169	S	21A (Delta)	0.0291402	960.31	MN					NextSeq	2021-10-21	unknown
Sample 1316	+	AY.25	21.655	S	21A (Delta)	0.0306457	1071.73	MN					NextSeq	2021-09-21	unknown
Sample 1317	+	B.1.1.7	24.1656	S	20I/501Y.V1	0.00284433	1040.4	NJ	49	M	WHITE	DECLINE TO IDENTIFY	NextSeq	2021-04-21	yes
Sample 1318	+	B.1.1.7	18.6841	S	20I/501Y.V1	0.00234239	2559.71	MN	22	M	WHITE	UNKNOWN	NovaSeq	2021-05-21	no
Sample 1319	+	B.1.1.7	22.2238	S	20I/501Y.V1	0.0186053	980.75	MN	25	M	BLACK	DECLINE TO IDENTIFY	NextSeq	2021-05-21	no
Sample 1320	+	AY.4	23.2903	S	21A (Delta)	0.0515557	776.25	ID					NextSeq	2021-10-21	unknown
Sample 1321	+	B.1.617.2	23.0987	S	21A (Delta)	0.338608	1560.54	MN					NovaSeq	2021-09-21	unknown
Sample 1322	+	P.1	27.7422	S	20J (Gamma, V3)	0.0543351	539.28	FL					NextSeq	2021-07-21	unknown
Sample 1323	+	Could Not Generate	29.7126	S	21A (Delta)	0.624725	266.3	MN					NextSeq	2021-10-21	unknown
Sample 1324	+	B.1.1.7	16.7905	S	20I/501Y.V1	0.00261009	2602.03	MN	57	M	WHITE	NON HISPANIC OR LATINO	NovaSeq	2021-04-21	no
Sample 1325	+	AY.4	19.3792	S	21A (Delta)	0.00869856	1504.22	NM					NovaSeq	2021-08-21	unknown
Sample 1326	+	AY.39	17.2237	S	21A (Delta)	0.00224163	3404.86	MN					NovaSeq	2021-10-21	unknown
Sample 1327	+	B.1.1.7	24.0088	S	20I/501Y.V1	0.00324588	912.81	NA		NA	NO INFORMATION	NO INFORMATION	NextSeq	2021-05-21	no
Sample 1328	+	AY.44	29.4089	S	21A (Delta)	0.0683035	650.63	NJ	39	F			NextSeq	2021-10-21	unknown
Sample 1329	+	AY.25	20.1173	S	21A (Delta)	0.0337541	1325.54	MN					NextSeq	2021-10-21	unknown
Sample 1330	+	B.1.1.7	21.678	S	20I/501Y.V1	0.00110427	2613.31	MN	17	F	WHITE	NON HISPANIC OR LATINO	NovaSeq	2021-04-21	no
Sample 1331	+	AY.25	27.3025	S	21A (Delta)	0.122784	667.41	MN					NextSeq	2021-10-21	unknown
Sample 1332	+	B.1.1.7	21.4302	S	20I/501Y.V1	0.00240932	2996.89	MN	44	M	WHITE	UNKNOWN	NovaSeq	2021-04-21	no
Sample 1333	+	B.1.1.7	25.0788	S	20I (ALPHA, V1)	0.0124816	1258.33	MN	60	M	WHITE	DECLINE TO IDENTIFY	NovaSeq	2021-05-21	no
Sample 1334	+	B.1.429	18.8516	S	20C	0.00344447	1465.84	MN	37	F	WHITE	NON HISPANIC OR LATINO	NextSeq	2021-04-21	no
Sample 1335	-	Sample Not Detected	25.1718	S				MN	68	M	ASIAN	NON HISPANIC OR LATINO	NextSeq	2021-04-21	no
Sample 1336	+	B.1.2	26.8487	S	20G	0.00906264	705.2	MN	45	F	DECLINE TO IDENTIFY	HISPANIC OR LATINO	NextSeq	2021-04-21	no
Sample 1337	+	B.1.1.7	10.8889	S	20I/501Y.V1	0.00237585	3149.38	MN	37	F	OTHER	UNKNOWN	NovaSeq	2021-05-21	no
Sample 1338	+	B.1.1.7	26.3591	S	20I/501Y.V1	0.00237585	2433.19	MN	20	F	WHITE	NON HISPANIC OR LATINO	NovaSeq	2021-04-21	no
Sample 1339	+	B.1.617.2	19.9266	S	21A (Delta)	0.023553	1028.65	NM					NextSeq	2021-10-21	unknown
Sample 1340	+	B.1.617.2	13.9085	S	21A (Delta)	0.00244229	1752.99	MN					NovaSeq	2021-09-21	unknown
Sample 1341	+	AY.12	14.8235	S	21A (Delta)	0.00267648	2011.59	MN					NextSeq	2021-08-21	unknown
Sample 1342	+	P.1	18.7718	S	20J (Gamma, V3)	0.00254198	1591.06	MN					NextSeq	2021-07-21	unknown
Sample 1343	+	AY.3	22.1589	S	21A (Delta)	0.00802944	1101.6	MN					NextSeq	2021-09-21	unknown
Sample 1344	+	Could Not Generate	21.4552	S	21A (Delta)	0.00531666	1717.74	MN					NovaSeq	2021-09-21	unknown
Sample 1345	+	B.1.1.7	29.7706	S	20I/501Y.V1	0.239666	796	NJ	36	F	WHITE	HISPANIC OR LATINO	NextSeq	2021-04-21	no
Sample 1346	+	AY.25	26.7496	S	21A (Delta)	0.0316159	775.46	MN					NextSeq	2021-09-21	unknown
Sample 1347	+	B.1.1.7	29.2722	S	20I/501Y.V1	0.133485	474.71	MN	23	M	WHITE	NON HISPANIC OR LATINO	NextSeq	2021-04-21	no
Sample 1348	+	B.1	29.5558	S	19A	0.470091	348.32	MN	10	F	WHITE	NON HISPANIC OR LATINO	NextSeq	2021-05-21	no
Sample 1349	+	AY.39	13.4252	S	21A (Delta)	0.00508531	1987.39	MN					NextSeq	2021-10-21	unknown
Sample 1350	+	AY.25	17.7534	S	21A (Delta)	0.0112758	1395.24	MN					NextSeq	2021-09-21	unknown
Sample 1351	+	AY.3.1	24.158	S	21A (Delta)	0.0477752	704.59	MN					NextSeq	2021-10-21	unknown
Sample 1352	+	B.1.617.2	21.7582	S	21A (Delta)	0.0121188	1376.57	MN					NextSeq	2021-09-21	unknown
Sample 1353	+	B.1.1.7	20.4946	S	20I/501Y.V1	0.000635792	1174.63	MN	31	M	WHITE	NON HISPANIC OR LATINO	NextSeq	2021-04-21	no
Sample 1354	+	AY.25	25.5046	S	21A (Delta)	0.0861827	728	MN					NextSeq	2021-09-21	unknown
Sample 1355	+	B.1.1.7	19.28	S	20I/501Y.V1	0.00257663	1468.8	MN	19	F	WHITE	NON HISPANIC OR LATINO	NextSeq	2021-05-21	no
Sample 1356	+	AY.4	16.6023	S	21A (Delta)	0.00873143	1343.02	NM					NovaSeq	2021-08-21	unknown
Sample 1357	+	AY.25	22.3311	S	21A (Delta)	0.00883209	945.17	MN					NextSeq	2021-10-21	unknown
Sample 1358	+	AY.25	21.4204	S	21A (Delta)	0.00234192	2868.76	MN					NovaSeq	2021-10-21	unknown
Sample 1359	+	B.1.617.2	26.396	S	21A (Delta)	0.00605554	1677.43	NJ					NovaSeq	2021-09-21	unknown
Sample 1360	+	B.1.617.2	24.52	S	21A (Delta)	0.0193376	1325.78	MN					NextSeq	2021-10-21	unknown
Sample 1361	+	B.1.1.7	15.6171	S	20I/501Y.V1	0.00244278	1630.54	WV	32	F	WHITE	NON HISPANIC OR LATINO	NextSeq	2021-05-21	no
Sample 1362	+	AY.25	25.0497	S	21A (Delta)	0.0219137	1148.98	MN					NextSeq	2021-10-21	unknown
Sample 1363	+	AY.25	25.9705	S	21A (Delta)	0.0456674	594.86	MN					NextSeq	2021-09-21	unknown
Sample 1364	+	B.1.1.7	28.2252	S	20I/501Y.V1	0.0456097	611.22	NA		NA	NO INFORMATION	NO INFORMATION	NextSeq	2021-04-21	no
Sample 1365	+	AY.4	26.4006	S	21A (Delta)	0.0121445	1913.47	MN					NovaSeq	2021-10-21	unknown
Sample 1366	+	AY.12	26.5926	S	21A (Delta)	0.0412513	657.09	NJ					NovaSeq	2021-08-21	unknown
Sample 1367	+	B.1.429	24.679	S	20C	0.0140793	1051.74	NA		NA	NO INFORMATION	NO INFORMATION	NextSeq	2021-04-21	no
Sample 1368	+	B.1.1.7	25.5232	S	20I/501Y.V1	0.00157275	2634.73	NJ	21	M	NO INFORMATION	NO INFORMATION	NextSeq	2021-04-21	unknown
Sample 1369	+	B.1.1.7	22.3906	S	20I/501Y.V1	0.00274394	1324.31	CO	20	F	WHITE	DECLINE TO IDENTIFY	NextSeq	2021-04-21	no
Sample 1370	+	B.1.617.2	14.1286	S	21A (Delta)	0.00314486	1624.7	MN					NextSeq	2021-09-21	unknown
Sample 1371	+	AY.25	26.5999	S	21A (Delta)	0.265851	1337.71	MN					NovaSeq	2021-09-21	unknown
Sample 1372	+	B.1.526	24.6241	S	20C	0.00160573	1330.22	NA		NA	NO INFORMATION	NO INFORMATION	NextSeq	2021-04-21	no
Sample 1373	+	B.1.526	19.6261	S	20C	0.00270966	1226.05	NJ	53	F	NO INFORMATION	NO INFORMATION	NextSeq	2021-04-21	unknown
Sample 1374	+	AY.3.1	18.7458	S	21A (Delta)	0.0157912	2027.38	MN					NextSeq	2021-07-21	unknown
Sample 1375	+	B.1.1.7	26.2596	S	20I/501Y.V1	0.0307553	1540.33	NA		NA	NO INFORMATION	NO INFORMATION	NovaSeq	2021-04-21	no
Sample 1376	+	AY.39	27.2617	S	21A (Delta)	0.00799599	1513.33	PA					NovaSeq	2021-10-21	unknown
Sample 1377	+	B.1.617.2	15.1959	S	21A (Delta)	0.0112078	1806.62	MN					NextSeq	2021-10-21	unknown
Sample 1378	+	B.1.1.7	22.3048	S	20I/501Y.V1	0.00284433	1251.59	NA		NA	NO INFORMATION	NO INFORMATION	NextSeq	2021-05-21	no
Sample 1379	+	B.1.526	21.3571	S	20C	0.00936674	1237.18	NJ	26	M	WHITE	DECLINE TO IDENTIFY	NextSeq	2021-04-21	no
Sample 1380	+	AY.3.1	23.1806	S	21A (Delta)	0.273284	1557.41	MN					NovaSeq	2021-09-21	unknown
Sample 1381	+	AY.4	21.313	S	21A (Delta)	0.0116419	2495.76	MN					NovaSeq	2021-10-21	unknown
Sample 1382	+	B.1.1	25.0767	S	20C	0.0108699	991.35	MN	62	F	WHITE	NON HISPANIC OR LATINO	NextSeq	2021-04-21	no
Sample 1383	+	B.1.617.2	23.2216	S	21A (Delta)	0.0124122	1270.16	MN					NextSeq	2021-10-21	unknown
Sample 1384	+	AY.4	15.0226	S	21A (Delta)	0.0108063	1575.32	MN					NextSeq	2021-08-21	unknown
Sample 1385	+	Could Not Generate	24.2229	S	21A (Delta)	0.0244563	989.54	MN					NextSeq	2021-09-21	unknown
Sample 1386	+	Could Not Generate	18.6302	S	20A	0.576733	463.46	OH					NextSeq	2021-09-21	unknown
Sample 1387	+	B.1.596	29.9426	S	20G	0.23096	853.04	MN	51	M	WHITE	NON HISPANIC OR LATINO	NovaSeq	2021-04-21	no
Sample 1388	+	B.1.596	24.9324	S	20G	0.0252149	932.65	NA		NA	NO INFORMATION	NO INFORMATION	NextSeq	2021-04-21	no
Sample 1389	+	B.1.617.2	25.6591	S	20A	0.107015	650.83	MN	39	M	ASIAN	DECLINE TO IDENTIFY	NextSeq	2021-05-21	yes
Sample 1390	+	B.1.1.7	19.6284	S	20I/501Y.V1	0.0025097	1342.86	MN	59	M	WHITE	DECLINE TO IDENTIFY	NextSeq	2021-05-21	no
Sample 1391	+	AY.3	16.4954	S	21A (Delta)	0.00434914	3060.01	WI					NovaSeq	2021-10-21	unknown
Sample 1392	+	B.1.617.2	22.5952	S	21A (Delta)	0.0271663	919.95	TX					NextSeq	2021-07-21	unknown
Sample 1393	+	B.1.1.7	15.4365	S	20I/501Y.V1	0.000635792	1030.21	NJ	45	F	OTHER	HISPANIC OR LATINO	NextSeq	2021-04-21	no
Sample 1394	+	AY.4	23.736	S	21A (Delta)	0.0107394	2958.48	MN					NovaSeq	2021-10-21	unknown
Sample 1395	+	B.1.617.2	18.8279	S	21A (Delta)	0.0167949	1385.19	MN					NextSeq	2021-09-21	unknown
Sample 1396	+	AY.3	27.9157	S	21A (Delta)	0.0858481	684.09	MN					NextSeq	2021-10-21	unknown
Sample 1397	+	B.1.617.2	23.6945	S	21A (Delta)	0.0189026	902.39	MN					NextSeq	2021-07-21	unknown
Sample 1398	+	B.1.617.2	24.2674	S	21A (Delta)	0.0126129	974.18	MN					NextSeq	2021-09-21	unknown
Sample 1399	+	AY.24	26.4858	S	21A (Delta)	0.0209727	2117.28	ND					NovaSeq	2021-10-21	unknown
Sample 1400	+	B.1.526	22.4056	S	20C	0.0245877	1035.72	NA		NA	NO INFORMATION	NO INFORMATION	NextSeq	2021-04-21	no
Sample 1401	+	B.1.1.7	22.3203	S	20I/501Y.V1	0.00247624	2565.67	NA		NA	NO INFORMATION	NO INFORMATION	NovaSeq	2021-04-21	no
Sample 1402	+	B.1.617.2	23.462	S	21A (Delta)	0.00247574	2389.68	MN					NovaSeq	2021-10-21	unknown
Sample 1403	+	AY.43	27.6976	S	21A (Delta)	0.10861	637.06	MN					NextSeq	2021-10-21	unknown
Sample 1404	+	B.1.617.2	24.4713	S	21A (Delta)	0.0224824	1148.63	MN					NextSeq	2021-10-21	unknown
Sample 1405	+	B.1.617.2	21.2722	S	21A (Delta)	0.0103379	1300.06	MN					NextSeq	2021-09-21	unknown
Sample 1406	+	B.1.1.7	23.1072	S	20I/501Y.V1	0.00287779	1285.87	ID	46	M	WHITE	NON HISPANIC OR LATINO	NextSeq	2021-05-21	no
Sample 1407	+	B.1.617.2	15.5679	S	21A (Delta)	0.0145534	1434.98	MN					NovaSeq	2021-09-21	unknown
Sample 1408	+	AY.4	21.4942	S	21A (Delta)	0.02091	1641.87	MN					NovaSeq	2021-10-21	unknown
Sample 1409	+	AY.3	25.0144	S	21A (Delta)	0.162541	452.49	NY	22	-	American Indian and Alaska Native; White	Not Hispanic or Latino	NextSeq	2021-09-21	unknown
Sample 1410	+	AY.39	27.1938	S	21A (Delta)	0.0280564	1139.47	MN					NovaSeq	2021-10-21	unknown
Sample 1411	+	B.1.617.2	13.1216	S	21A (Delta)	0.00227691	1727.27						NovaSeq	2021-08-21	unknown
Sample 1412	+	B.1.1.7	20.7933	S	20I/501Y.V1	0.00287779	967.76	MN	41	F	WHITE	NON HISPANIC OR LATINO	NextSeq	2021-04-21	yes
Sample 1413	+	AY.24	24.4181	S	21A (Delta)	0.0994982	438.73	MN					NextSeq	2021-10-21	unknown
Sample 1414	+	B.1.617.2	18.813	S	21A (Delta)	0.00247574	1448.52	MN					NextSeq	2021-08-21	unknown
Sample 1415	+	B.1.617.2	21.6599	S	21A (Delta)	0.00635664	1190.48	MN					NextSeq	2021-10-21	unknown
Sample 1416	+	B.1.1.7	20.3096	S	20I/501Y.V1	0.00518672	969.65	MN	24	F	DECLINE TO IDENTIFY	DECLINE TO IDENTIFY	NextSeq	2021-05-21	yes
Sample 1417	+	B.1.429	19.7975	S	20C	0.00240779	2948.07	MN	7	M	BLACK	NON HISPANIC OR LATINO	NovaSeq	2021-05-21	no
Sample 1418	+	B.1.1.7	27.4369	S	20I/501Y.V1	0.0352362	887.69	MN	9	F	OTHER	HISPANIC OR LATINO	NextSeq	2021-05-21	no
Sample 1419	+	B.1.617.2	18.0482	S	21A (Delta)	0.00331214	1293.96	WA					NovaSeq	2021-09-21	unknown
Sample 1420	+	B.1.429	22.4339	S	20C	0.0590123	1137.24	MN	37	M	WHITE	NON HISPANIC OR LATINO	NextSeq	2021-05-21	no
Sample 1421	+	AY.25	15.6133	S	21A (Delta)	0.00287722	1173.95	MN					NextSeq	2021-08-21	unknown
Sample 1422	+	B.1.1.7	23.8145	S	20I (ALPHA, V1)	0.0073618	1134.73	MN		NA	NO INFORMATION	NO INFORMATION	NextSeq	2021-06-21	no
Sample 1423	+	B.1.617.2	17.1759	S	21A (Delta)	0.00257611	1356.48	MN					NextSeq	2021-09-21	unknown
Sample 1424	+	B.1.1.7	16.4727	S	20I/501Y.V1	0.00073618	1394.45	MN	60	M	WHITE	NON HISPANIC OR LATINO	NextSeq	2021-04-21	no
Sample 1425	+	P.1	19.7332	S	20J (Gamma, V3)	0.018931	1514.14	FL					NovaSeq	2021-07-21	unknown
Sample 1426	+	AY.4	19.0201	S	21A (Delta)	0.0340567	1078.97	MN					NextSeq	2021-09-21	unknown
Sample 1427	+	B.1.1.7	20.0842	S	20I/501Y.V1	0.00853299	2183.08	MN	53	F	WHITE	UNKNOWN	NovaSeq	2021-04-21	no
Sample 1428	+	AY.4	22.8574	S	21A (Delta)	0.00405347	2634.62	MN					NovaSeq	2021-10-21	unknown
Sample 1429	+	B.1.617.2	15.0495	S	21A (Delta)	0.00234192	1915.34	MN					NovaSeq	2021-08-21	unknown
Sample 1430	+	B.1.1.519	23.0932	S	20B	0.00421362	2064.08	NA		NA	NO INFORMATION	NO INFORMATION	NovaSeq	2021-04-21	no
Sample 1431	+	AY.10	25.3269	S	21A (Delta)	0.0970698	1319.14	MN					NovaSeq	2021-10-21	unknown
Sample 1432	+	B.1.617.2	26.8122	S	21A (Delta)	0.0418967	775.54	MN					NovaSeq	2021-08-21	unknown
Sample 1433	+	AY.3	25.3487	S	21A (Delta)	0.0390432	921.28	MN					NextSeq	2021-10-21	unknown
Sample 1434	+	Could Not Generate	13.7402	S	21A (Delta)	0.008364	1627.28	MN					NextSeq	2021-09-21	unknown
Sample 1435	+	AY.3	26.1006	S	21A (Delta)	0.0404593	933.07	MN					NextSeq	2021-09-21	unknown
Sample 1436	+	B.1.1.7	24.058	S	20I/501Y.V1	0.0373481	696.37	MN	33	M	WHITE	HISPANIC OR LATINO	NextSeq	2021-05-21	yes
Sample 1437	+	Could Not Generate	19.9679	S	21A (Delta)	0.00274339	1711.62	MN					NextSeq	2021-09-21	unknown
Sample 1438	+	B.1.617.2	19.453	S	21A (Delta)	0.00244229	3226.89	MN					NovaSeq	2021-10-21	unknown
Sample 1439	+	AY.4	25.2718	S	21A (Delta)	0.0270325	960.35	ID					NextSeq	2021-10-21	unknown
Sample 1440	+	AY.26	26.243	S	21A (Delta)	0.0800602	918.31	MN					NovaSeq	2021-10-21	unknown
Sample 1441	+	AY.4	24.1208	S	21A (Delta)	0.0061559	1541.39	MN					NovaSeq	2021-10-21	unknown
Sample 1442	+	AY.3.1	20.4602	S	21A (Delta)	0.0109736	2572	MN					NovaSeq	2021-10-21	unknown
Sample 1443	+	B.1.617.2	16.5286	S	21A (Delta)	0.00260957	1868	MN					NextSeq	2021-08-21	unknown
Sample 1444	+	AY.26	27.9382	S	21A (Delta)	0.307299	925.96	MN					NovaSeq	2021-10-21	unknown
Sample 1445	+	B.1.617.2	14.3143	S	21A (DELTA)	0.017096	1001.53	NA		NA	NO INFORMATION	NO INFORMATION	NextSeq	2021-06-21	unknown
Sample 1446	+	AY.4	12.8838	S	21A (Delta)	0.00244229	1530.18	MN					NextSeq	2021-09-21	unknown
Sample 1447	+	B.1.1.294	28.7347	S	21A (Delta)	0.307795	390.45	MN					NextSeq	2021-10-21	unknown
Sample 1448	+	B.1.617.2	23.6963	S	21A (Delta)	0.0470726	607.37	MD	18	male	Hispanic or Latino	Hispanic or Latino	NextSeq	2021-10-21	unknown
Sample 1449	+	B.1.617.2	23.9301	S	21A (Delta)	0.0210773	1120.99	MN					NextSeq	2021-09-21	unknown
Sample 1450	+	B.1.1.7	29.0159	S	20I/501Y.V1	0.158927	792.7	MN	48	M	WHITE	NON HISPANIC OR LATINO	NextSeq	2021-05-21	no
Sample 1451	+	B.1	28.0414	S	20B	0.0525876	607.76	NA		NA	NO INFORMATION	NO INFORMATION	NextSeq	2021-04-21	no
Sample 1452	+	AY.3	26.3473	S	21A (Delta)	0.065741	610.25	MN					NextSeq	2021-09-21	unknown
Sample 1453	+	AY.4	23.9863	S	21A (Delta)	0.0028103	1639.79	MN					NovaSeq	2021-08-21	unknown
Sample 1454	+	AY.25	19.6483	S	21A (Delta)	0.0108397	1528.32	MN					NextSeq	2021-09-21	unknown
Sample 1455	+	B.1.1.7	27.9195	S	20I/501Y.V1	0.293889	434.1	MN	8	F	WHITE	DECLINE TO IDENTIFY	NextSeq	2021-04-21	no
Sample 1456	+	AY.3	27.8391	S	21A (Delta)	0.256949	206.27	MN					NovaSeq	2021-08-21	unknown
Sample 1457	+	B.1.1.7	26.4752	S	20I (ALPHA, V1)	0.0268036	756.91	MN	26	F	DECLINE TO IDENTIFY	HISPANIC OR LATINO	NovaSeq	2021-06-21	no
Sample 1458	+	B.1.1.7	20.5771	S	20I/501Y.V1	0.0612852	702.34	MN	37	M	WHITE	NON HISPANIC OR LATINO	NextSeq	2021-05-21	no
Sample 1459	+	B.1.617.2	19.645	S	21A (Delta)	0.00321178	1555.74	MN					NextSeq	2021-10-21	unknown
Sample 1460	+	B.1.617.2	12.7654	S	21A (Delta)	0.00344597	1608.34	MN					NextSeq	2021-09-21	unknown
Sample 1461	+	B.1.1.7	25.8675	S	20I/501Y.V1	0.0235578	2024.25	MN	23	M	WHITE	NON HISPANIC OR LATINO	NovaSeq	2021-04-21	no
Sample 1462	+	AY.4	26.4418	S	21A (Delta)	0.0253262	1056.74	ID					NextSeq	2021-09-21	unknown
Sample 1463	-	Sample Not Detected	28.879	S				MN					NextSeq	2021-10-21	unknown
Sample 1464	+	AY.25	25.424	S	21A (Delta)	0.0804282	420.66	MN					NovaSeq	2021-09-21	unknown
Sample 1465	+	Could Not Generate	19.3692	S	21A (Delta)	0.0136501	2256.48	MN					NovaSeq	2021-09-21	unknown
Sample 1466	+	B.1.1.7	17.6594	S	20I/501Y.V1	0.0034132	1062.85	NA		NA	NO INFORMATION	NO INFORMATION	NextSeq	2021-05-21	yes
Sample 1467	+	B.1.575	26.3618	S	20C	0.040701	1031.03	PA	17	F	BLACK	HISPANIC OR LATINO	NextSeq	2021-04-21	no
Sample 1468	+	B.1.526	23.4844	S	20C	0.00180644	1226.49	NJ	18	M	BLACK	NO INFORMATION	NextSeq	2021-04-21	no
Sample 1469	-	Sample Not Detected	27.0392	S				MN	39	M	DECLINE TO IDENTIFY	DECLINE TO IDENTIFY	NextSeq	2021-04-21	no
Sample 1470	+	B.1.1.7	21.3665	S	20I/501Y.V1	0.00247624	2607.41	MN	38	F	WHITE	DECLINE TO IDENTIFY	NovaSeq	2021-05-21	yes
Sample 1471	+	B.1.617.2	23.4435	S	21A (Delta)	0.0190699	1034.37	MN					NextSeq	2021-07-21	unknown
Sample 1472	+	A	26.5643	S	20A	0.459869	370.26	MN	16	F	WHITE	UNKNOWN	NextSeq	2021-05-21	no
Sample 1473	+	B.1.1.7	22.644	S	20I/501Y.V1	0.00160621	1059.55	MN	51	M	WHITE	NON HISPANIC OR LATINO	NextSeq	2021-04-21	no
Sample 1474	+	B.1.526	22.9013	S	20C	0.0102365	906.61	NJ	17	M	WHITE	HISPANIC OR LATINO	NextSeq	2021-05-21	no
Sample 1475	+	AY.25	23.3351	S	21A (Delta)	0.0128137	1842.15	NM					NovaSeq	2021-10-21	unknown
Sample 1476	+	AY.3	28.4147	S	21A (Delta)	0.0367	772.01	MN					NextSeq	2021-09-21	unknown
Sample 1477	+	B.1.1.7	22.0818	S	20I/501Y.V1	0.0113104	801.36	MN	34	M	WHITE	NON HISPANIC OR LATINO	NextSeq	2021-04-21	no
Sample 1478	+	Could Not Generate	28.604	S	20A	0.587165	194.7	MN					NextSeq	2021-10-21	unknown
Sample 1479	+	B.1.575	13.8266	S	20C	0.00990033	1485.87	NA		NA	NO INFORMATION	NO INFORMATION	NextSeq	2021-04-21	no
Sample 1480	+	B.1.1.7	18.5443	S	20I (ALPHA, V1)	0.00254317	1307.13	MN	17	F	BLACK	DECLINE TO IDENTIFY	NovaSeq	2021-06-21	no
Sample 1481	+	AY.7.1	26.9339	S	21A (Delta)	0.0871296	547.66	PA					NextSeq	2021-10-21	unknown
Sample 1482	+	B.1.1.7	21.5532	S	20I/501Y.V1	0.00073618	2812.55	MN	21	F	WHITE	DECLINE TO IDENTIFY	NovaSeq	2021-04-21	no
Sample 1483	+	B.1.617.2	16.4783	S	21A (Delta)	0.00274339	1172.72	MN					NovaSeq	2021-09-21	unknown
Sample 1484	+	B.1.1.7	22.9701	S	20I/501Y.V1	0.00274394	1406.51	MN	25	F	WHITE	NON HISPANIC OR LATINO	NextSeq	2021-05-21	no
Sample 1485	+	AY.23	21.4169	S	21A (Delta)	0.0532847	646.27	MN					NovaSeq	2021-10-21	unknown
Sample 1486	+	AY.44	26.0434	S	21A (Delta)	0.0187354	1553.4	MN					NextSeq	2021-10-21	unknown
Sample 1487	+	AY.4	23.4828	S	21A (Delta)	0.0217464	871.71	MN					NextSeq	2021-09-21	unknown
Sample 1488	+	B.1.617.2	22.3105	S	21A (Delta)	0.00291067	1314.54	MN					NextSeq	2021-09-21	unknown
Sample 1489	+	B.1.617.2	13.5858	S	21A (Delta)	0.0107059	1427.22	MN					NovaSeq	2021-08-21	unknown
Sample 1490	+	AY.4	20.9915	S	21A (Delta)	0.0114831	1121.09	MN					NovaSeq	2021-08-21	unknown
Sample 1491	+	AY.25	17.2136	S	21A (Delta)	0.0132151	1400.88	MN					NextSeq	2021-09-21	unknown
Sample 1492	+	Could Not Generate	18.5059	S	21A (Delta)	0.026999	1700.65	MN					NovaSeq	2021-09-21	unknown
Sample 1493	+	Could Not Generate	26.3865	S	21A (Delta)	0.0655738	971.25						NovaSeq	2021-09-21	unknown
Sample 1494	+	B.1.1.7	21.2464	S	20I/501Y.V1	0.00277741	1450.85	MN	60	M	WHITE	NON HISPANIC OR LATINO	NextSeq	2021-05-21	no
Sample 1495	+	AY.4	24.8557	S	21A (Delta)	0.00264302	1837.94	MN					NextSeq	2021-09-21	unknown
Sample 1496	+	Could Not Generate	28.7896	S	21A (Delta)	0.24985	431.07	WV					NextSeq	2021-09-21	unknown
Sample 1497	+	B.1.617.2	19.832	S	21A (Delta)	0.00247574	1911.1	MN					NextSeq	2021-10-21	unknown
Sample 1498	+	AY.19	22.6356	S	21A (Delta)	0.023027	1299.31	NM					NovaSeq	2021-09-21	unknown
Sample 1499	+	AY.4	26.7663	S	21A (Delta)	0.075194	663.89	MN					NextSeq	2021-08-21	unknown
Sample 1500	+	B.1.1.7	22.0821	S	20I/501Y.V1	0.0197542	945.62	MN	31	M	WHITE	UNKNOWN	NextSeq	2021-04-21	no
Sample 1501	+	AY.12	29.2057	S	21A (Delta)	0.205362	292.34						NovaSeq	2021-09-21	unknown
Sample 1502	+	B.1.1.519	20.9622	S	20B	0.0136776	874.04	MN	51	M	WHITE	DECLINE TO IDENTIFY	NextSeq	2021-04-21	no
Sample 1503	+	AY.5	24.9821	S	21A (Delta)	0.0675341	1051.99	MN					NovaSeq	2021-09-21	unknown
Sample 1504	+	B.1.1.7	21.2751	S	20I/501Y.V1	0.00107081	2111.03	NA		NA	NO INFORMATION	NO INFORMATION	NovaSeq	2021-04-21	no
Sample 1505	+	B.1.1.7	19.7913	S	20I/501Y.V1	0.00281068	1154.8	NJ	65	F	WHITE	HISPANIC OR LATINO	NextSeq	2021-05-21	no
Sample 1506	+	AY.3	23.1918	S	21A (Delta)	0.0301439	1334.53	MN					NextSeq	2021-10-21	unknown
Sample 1507	+	B.1.617.2	23.4559	S	21A (Delta)	0.018635	1369.98	MN					NextSeq	2021-10-21	unknown
Sample 1508	+	B.1.1.7	25.0273	S	20I/501Y.V1	0.225731	636.21	MN	10	F	WHITE	NON HISPANIC OR LATINO	NextSeq	2021-05-21	no
Sample 1509	+	B.1.526	23.9565	S	20C	0.0149868	1117.87	MN	42	F	DECLINE TO IDENTIFY	DECLINE TO IDENTIFY	NovaSeq	2021-05-21	no
Sample 1510	+	B.1.1.7	23.5842	S	20I/501Y.V1	0.0174376	846.19	MN	52	M	WHITE	NON HISPANIC OR LATINO	NextSeq	2021-04-21	no
Sample 1511	+	AY.3	9.54132	S	21A (Delta)	0.0044831	1228.79	FL					NovaSeq	2021-09-21	unknown
Sample 1512	+	AY.3	25.3092	S	21A (Delta)	0.0564737	515.76						NovaSeq	2021-09-21	unknown
Sample 1513	+	AY.26	27.6903	S	21A (Delta)	0.11733	351.32	WI					NextSeq	2021-10-21	unknown
Sample 1514	+	AY.25	15.1787	S	21A (Delta)	0.00498494	1739.13	MN					NextSeq	2021-10-21	unknown
Sample 1515	+	B.1.1.7	25.5976	S	20I/501Y.V1	0.0959711	660.62	MN	31	M	WHITE	DECLINE TO IDENTIFY	NextSeq	2021-04-21	no
Sample 1516	+	B.1.617.2	23.2198	S	21A (Delta)	0.0136501	1114.46	WY					NextSeq	2021-09-21	unknown
Sample 1517	+	B.1.617.2	14.7152	S	21A (Delta)	0.00247574	1530.83	MN					NovaSeq	2021-09-21	unknown
Sample 1518	+	AY.4	17.5897	S	21A (Delta)	0.0112078	1118.09	MN					NextSeq	2021-10-21	unknown
Sample 1519	+	B.1.617.2	20.1272	S	21A (Delta)	0.0102375	1141.7	NM					NovaSeq	2021-09-21	unknown
Sample 1520	+	B.1.1.7	27.7186	S	20I/501Y.V1	0.00575559	1754.02	MN	20	M	WHITE	NON HISPANIC OR LATINO	NovaSeq	2021-04-21	no
Sample 1521	+	B.1.1.7	24.7784	S	20I/501Y.V1	0.010775	917.19	MN	5	M	WHITE	HISPANIC OR LATINO	NextSeq	2021-05-21	no
Sample 1522	+	AY.39	28.6669	S	21A (Delta)	0.044866	1221.91	MN					NovaSeq	2021-10-21	unknown
Sample 1523	+	B.1.1.7	26.0307	S	20I/501Y.V1	0.00675947	970.39	NJ	19	F	WHITE	NON HISPANIC OR LATINO	NextSeq	2021-05-21	no
Sample 1524	+	B.1.617.2	22.2316	S	21A (Delta)	0.00277685	1249.28	MN					NovaSeq	2021-08-21	unknown
Sample 1525	+	B.1.1.7	20.4504	S	20I/501Y.V1	0.00123812	1294.76	MN	30	F	WHITE	NON HISPANIC OR LATINO	NextSeq	2021-04-21	no
Sample 1526	+	Could Not Generate	28.9842	S	20A	0.609042	559.66	WV					NovaSeq	2021-09-21	unknown
Sample 1527	+	AY.3	23.3105	S	21A (Delta)	0.0177986	1220.34	MN					NovaSeq	2021-10-21	unknown
Sample 1528	+	AY.3	21.1865	S	21A (Delta)	0.0130144	1573.73	MN					NextSeq	2021-10-21	unknown
Sample 1529	+	AY.12	27.1273	S	21A (Delta)	0.199632	386.31						NextSeq	2021-09-21	unknown
Sample 1530	+	AY.33	28.2906	S	21A (Delta)	0.0995651	1019.86	DE					NovaSeq	2021-10-21	unknown
Sample 1531	+	AY.4	21.1024	S	21A (Delta)	0.00391435	1451.07	MN					NextSeq	2021-10-21	unknown
Sample 1532	+	B.1.1.7	20.2004	S	20I/501Y.V1	0.00160621	1446.88	MN	23	M	WHITE	NON HISPANIC OR LATINO	NextSeq	2021-04-21	no
Sample 1533	+	B.1.1.7	17.8847	S	20I/501Y.V1	0.0571878	1166.57	MN	68	M	WHITE	DECLINE TO IDENTIFY	NextSeq	2021-04-21	no
Sample 1534	+	B.1.1.7	27.9693	S	20I/501Y.V1	0.347036	409.84	MN	29	F	WHITE	UNKNOWN	NextSeq	2021-04-21	no
Sample 1535	+	B.1.1.7	22.4946	S	20I/501Y.V1	0.00264356	1226.14	MN	15	F	DECLINE TO IDENTIFY	DECLINE TO IDENTIFY	NextSeq	2021-05-21	no
Sample 1536	+	AY.25	12.2274	S	21A (Delta)	0.00347942	1800.7	MN					NextSeq	2021-09-21	unknown
Sample 1537	+	B.1.429	20.2402	S	20C	0.00240779	2355.91	MN	52	F	WHITE	NON HISPANIC OR LATINO	NovaSeq	2021-05-21	no
Sample 1538	+	AY.39	26.1867	S	21A (Delta)	0.0714811	424.84	MN					NovaSeq	2021-10-21	unknown
Sample 1539	+	AY.25	20.7005	S	21A (Delta)	0.00277685	1879.93	MN					NovaSeq	2021-10-21	unknown
Sample 1540	+	AY.12	23.4195	S	21A (Delta)	0.0704583	645.16	MN					NextSeq	2021-08-21	unknown
Sample 1541	+	AY.4	20.9071	S	21A (Delta)	0.00819672	1471.92	MN					NovaSeq	2021-10-21	unknown
Sample 1542	+	AY.12	27.7377	S	21A (Delta)	0.121246	348.47	MN					NovaSeq	2021-08-21	unknown
Sample 1543	+	AY.14	25.5537	S	21A (Delta)	0.161604	309.63						NovaSeq	2021-09-21	unknown
Sample 1544	+	AY.25	25.7317	S	21A (Delta)	0.0281365	847.71	MN					NextSeq	2021-09-21	unknown
Sample 1545	+	AY.9	25.3694	S	21A (Delta)	0.0590498	649.69	MN					NextSeq	2021-10-21	unknown
Sample 1546	+	AY.12	25.5885	S	21A (Delta)	0.032352	836.34	NM					NextSeq	2021-08-21	unknown
Sample 1547	+	AY.25	26.0622	S	21A (Delta)	0.0105721	1394.08	NJ					NextSeq	2021-10-21	unknown
Sample 1548	+	B.1.351	24.4164	S	20H/501Y.V2	0.00839971	1008.63	MN	25	M	WHITE	DECLINE TO IDENTIFY	NextSeq	2021-05-21	no
Sample 1549	+	B.1.1.7	26.3814	S	20I/501Y.V1	0.0337304	666.77	MN	28	F	WHITE	NON HISPANIC OR LATINO	NextSeq	2021-05-21	yes
Sample 1550	+	AY.4	22.7884	S	21A (Delta)	0.0148439	997.48	MN					NextSeq	2021-10-21	unknown
Sample 1551	+	B.1.1.519	26.2078	S	20B	0.023409	809.18	MN	64	M	WHITE	NON HISPANIC OR LATINO	NextSeq	2021-04-21	no
Sample 1552	+	AY.14	22.7939	S	21A (Delta)	0.0338575	805.44	MN					NovaSeq	2021-09-21	unknown
Sample 1553	+	AY.3	23.7523	S	21A (Delta)	0.0152863	1592.1	MN					NextSeq	2021-08-21	unknown
Sample 1554	+	B.1.1.7	22.2354	S	20I/501Y.V1	0.00107081	3288.73	WY	22	M	BLACK	DECLINE TO IDENTIFY	NovaSeq	2021-04-21	no
Sample 1555	+	AY.4	20.0712	S	21A (Delta)	0.00498945	1326.23	MN					NextSeq	2021-10-21	unknown
Sample 1556	+	AY.33	25.7775	S	21A (Delta)	0.0365935	910.42	MN					NovaSeq	2021-10-21	unknown
Sample 1557	+	B.1.1.7	19.2245	S	20I/501Y.V1	0.00240932	3137.26	MN	57	F	WHITE	DECLINE TO IDENTIFY	NovaSeq	2021-04-21	no
Sample 1558	+	B.1.1.7	21.8405	S	20I/501Y.V1	0.0560835	1200.03	WI	20	F	WHITE	NON HISPANIC OR LATINO	NextSeq	2021-05-21	no
Sample 1559	+	B	22.5449	S	20B	0.363275	426.41	MN	69	F	ASIAN	NON HISPANIC OR LATINO	NovaSeq	2021-05-21	no
Sample 1560	+	B.1.1.7	25.5447	S	20I/501Y.V1	0.00160621	2341.86	NA		NA	NO INFORMATION	NO INFORMATION	NovaSeq	2021-04-21	unknown
Sample 1561	+	AY.39	20.6531	S	21A (Delta)	0.0157912	1412.44	MN					NextSeq	2021-10-21	unknown
Sample 1562	+	B.1.1.7	24.6876	S	20I/501Y.V1	0.0105408	799.36	MN	29	M	WHITE	UNKNOWN	NextSeq	2021-04-21	no
Sample 1563	+	B.1.617.2	25.6103	S	21A	0.136707	476.44	WV					NextSeq	2021-09-21	unknown
Sample 1564	+	AY.3.1	16.3093	S	21A (Delta)	0.0195718	1798.02	MN					NextSeq	2021-10-21	unknown
Sample 1565	+	Could Not Generate	29.7019	S	19A	0.558949	158.88	ID					NextSeq	2021-10-21	unknown
Sample 1566	+	B.1.1.7	23.7918	S	20I/501Y.V1	0.00274394	1151.51	MN	26	M	WHITE	NON HISPANIC OR LATINO	NextSeq	2021-04-21	yes
Sample 1567	+	B.1.617.2	26.6898	S	21A (Delta)	0.29519	462.19	MN					NovaSeq	2021-09-21	unknown
Sample 1568	+	AY.3	26.596	S	21A (Delta)	0.0566076	608.03	MN					NovaSeq	2021-08-21	unknown
Sample 1569	+	B.1.2	20.159	S	20G	0.000635388	2688.08	NA		NA	NO INFORMATION	NO INFORMATION	NovaSeq	2021-04-21	no
Sample 1570	+	B.1.1.7	20.3932	S	20I/501Y.V1	0.00167314	1299.22	MN	43	M	DECLINE TO IDENTIFY	HISPANIC OR LATINO	NextSeq	2021-04-21	no
Sample 1571	+	B.1.617.2	20.0706	S	21A (Delta)	0.00384744	1235.76	MN					NextSeq	2021-10-21	unknown
Sample 1572	+	AY.39	22.6551	S	21A (Delta)	0.022779	2413.33	MN					NovaSeq	2021-10-21	unknown
Sample 1573	-	Sample Not Detected	21.9121	S				OR	11	F	WHITE	UNKNOWN	NextSeq	2021-04-21	no
Sample 1574	+	B.1.1.7	20.451	S	20I/501Y.V1	0.0227881	1102.43	MN	16	M	DECLINE TO IDENTIFY	DECLINE TO IDENTIFY	NextSeq	2021-05-21	no
Sample 1575	+	B	27.9404	S	20C	0.157379	351.8	NJ					NovaSeq	2021-10-21	unknown
Sample 1576	+	B.1.1.7	10.8865	S	20I/501Y.V1	0.00237585	2577.17	MN	59	M	WHITE	NON HISPANIC OR LATINO	NovaSeq	2021-05-21	no
Sample 1577	+	AY.3	19.3679	S	21A (Delta)	0.0159585	1479.56	NY					NextSeq	2021-10-21	unknown
Sample 1578	+	AY.4	14.9636	S	21A (Delta)	0.00933423	2033.66	MN					NovaSeq	2021-08-21	unknown
Sample 1579	+	Could Not Generate	18.124	S	21A (Delta)	0.665128	329.48	MN					NextSeq	2021-10-21	unknown
Sample 1580	+	B.1.1.7	23.4482	S	20I/501Y.V1	0.000435015	2077.04	MN	42	F	OTHER	HISPANIC OR LATINO	NovaSeq	2021-04-21	no
Sample 1581	+	B.1.1.7	17.3877	S	20I/501Y.V1	0.0409249	1212.97	MN	42	M	UNKNOWN	HISPANIC OR LATINO	NextSeq	2021-05-21	no
Sample 1582	+	B.1.1.519	26.7571	S	20B	0.0369528	647.4	NA		NA	NO INFORMATION	NO INFORMATION	NextSeq	2021-04-21	no
Sample 1583	+	B.1.1.7	22.5417	S	20I (ALPHA, V1)	0.00281087	1573.19	MN	23	M	WHITE	DECLINE TO IDENTIFY	NextSeq	2021-06-21	no
Sample 1584	+	B.1.1.519	18.6599	S	20B	0.00180584	1259.29	NA		NA	NO INFORMATION	NO INFORMATION	NextSeq	2021-04-21	no
Sample 1585	+	AY.4	15.6692	S	21A (Delta)	0.0107728	1542.75	TX					NovaSeq	2021-08-21	unknown
Sample 1586	+	B.1.1.7	19.4007	S	20I/501Y.V1	0.00153929	1285.42	MN	55	M	BLACK	NON HISPANIC OR LATINO	NextSeq	2021-04-21	no
Sample 1587	+	B.1.617.2	18.9702	S	21A (Delta)	0.00274284	1106.55	FL					NovaSeq	2021-08-21	unknown
Sample 1588	+	AY.4	20.8796	S	21A (Delta)	0.0105721	1468.31	MN					NextSeq	2021-08-21	unknown
Sample 1589	+	P.1	15.2232	S	20J/501Y.V3	0.00247508	1492.88	MN	13	F	WHITE	NON HISPANIC OR LATINO	NextSeq	2021-05-21	no
Sample 1590	+	B.1.1.7	27.2008	S	20I/501Y.V1	0.0188395	2327.42	MN	26	F	WHITE	NON HISPANIC OR LATINO	NovaSeq	2021-04-21	no
Sample 1591	+	B.1.1.7	22.3476	S	20I (ALPHA, V1)	0.0036809	1324.48	SC		NA	NO INFORMATION	NO INFORMATION	NextSeq	2021-06-21	no
Sample 1592	+	AY.4	12.7999	S	21A (Delta)	0.00254266	1979.93	MN					NextSeq	2021-09-21	unknown
Sample 1593	+	B.1.617.2	26.6406	S	21A (Delta)	0.00230846	1817.24						NextSeq	2021-10-21	unknown
Sample 1594	+	AY.25	12.276	S	21A (Delta)	0.0516895	991.98	PA					NextSeq	2021-09-21	unknown
Sample 1595	+	B.1.1.7	13.7514	S	20I/501Y.V1	0.00247624	1555.02	MN	26	M	WHITE	DECLINE TO IDENTIFY	NextSeq	2021-05-21	no
Sample 1596	+	B.1.526.2	26.4141	S	20C	0.0304319	675.17	MN	8	M	OTHER	HISPANIC OR LATINO	NextSeq	2021-05-21	no
Sample 1597	+	Could Not Generate	29.497	S	21A (Delta)	0.127267	527.57	MN					NextSeq	2021-08-21	unknown
Sample 1598	+	B.1.311	24.278	S	20C	0.0228405	947.55	NJ	20	M	WHITE	NON HISPANIC OR LATINO	NextSeq	2021-04-21	no
Sample 1599	+	AY.25	28.5541	S	21A (Delta)	0.0293075	1833.87	MN					NovaSeq	2021-10-21	unknown
Sample 1600	+	AY.3	26.1241	S	21A (Delta)	0.0162931	1759.64	MN					NovaSeq	2021-10-21	unknown
Sample 1601	+	AY.4	26.3761	S	21A (Delta)	0.0672131	502.45	MN					NextSeq	2021-09-21	unknown
Sample 1602	+	B.1.617.2	26.2722	S	21A (Delta)	0.19535	385.49	MN					NextSeq	2021-10-21	unknown
Sample 1603	+	AY.25	22.2082	S	21A (Delta)	0.0266644	1100.27	MN					NovaSeq	2021-08-21	unknown
Sample 1604	+	AY.4	18.984	S	21A (Delta)	0.0026789	1801.05	ID					NextSeq	2021-10-21	unknown
Sample 1605	+	B.1.1.7	16.7841	S	20I/501Y.V1	0.189867	517.07	NJ	30	M	NO INFORMATION	NO INFORMATION	NextSeq	2021-04-21	unknown
Sample 1606	+	B.1.617.2	19.5342	S	21A (Delta)	0.0114397	1523.67	MN					NextSeq	2021-09-21	unknown
Sample 1607	+	Could Not Generate	26.7063	S	20A	0.0829598	500.16						NovaSeq	2021-08-21	unknown
Sample 1608	+	B.1.526	24.671	S	21F (IOTA)	0.00274312	1281.73	MN		NA	NO INFORMATION	NO INFORMATION	NextSeq	2021-06-21	no
Sample 1609	+	B.1.617.2	27.8117	S	20A	0.114296	401.67						NovaSeq	2021-10-21	unknown
Sample 1610	+	AY.4	21.6702	S	21A (Delta)	0.00227501	2406.86	MN					NovaSeq	2021-10-21	unknown
Sample 1611	+	B.1.526.2	22.6097	S	20C	0.0232675	1111.18	NJ	39	M	WHITE	NON HISPANIC OR LATINO	NextSeq	2021-04-21	no
Sample 1612	+	B	28.3128	S	20A	0.354462	471.24	MN					NextSeq	2021-08-21	unknown
Sample 1613	+	B.1.1.7	23.3161	S	20I/501Y.V1	0.0135275	1026.78	MN	41	M	WHITE	NON HISPANIC OR LATINO	NextSeq	2021-05-21	yes
Sample 1614	+	B.1.1.7	24.2398	S	20I/501Y.V1	0.00903494	1712.79	MN	57	F	WHITE	NON HISPANIC OR LATINO	NovaSeq	2021-04-21	no
Sample 1615	+	AY.3.1	26.2084	S	21A (Delta)	0.0392439	1222.86	NJ					NextSeq	2021-09-21	unknown
Sample 1616	+	B.1.617.2	21.491	S	21A (Delta)	0.0232854	1113.33	MN					NextSeq	2021-08-21	unknown
Sample 1617	+	B.1.617.2	20.0244	S	21A (Delta)	0.0121429	1110.86	MN					NextSeq	2021-10-21	unknown
Sample 1618	+	B.1.1.7	22.8473	S	20I/501Y.V1	0.00170694	1361.65	MN	17	F	WHITE	NON HISPANIC OR LATINO	NextSeq	2021-04-21	no
Sample 1619	+	B.1	29.1443	S	20A	0.238777	833.91	NA		NA	NO INFORMATION	NO INFORMATION	NovaSeq	2021-04-21	no
Sample 1620	+	B.1.1.7	23.7851	S	20I/501Y.V1	0.0126154	2377.3	NA		NA	NO INFORMATION	NO INFORMATION	NovaSeq	2021-04-21	no
Sample 1621	+	B.1.617.2	21.9327	S	21A (Delta)	0.0122114	1274.5	WY					NovaSeq	2021-09-21	unknown
Sample 1622	+	AY.4	23.0274	S	21A (Delta)	0.00940491	1703.62	MN					NextSeq	2021-10-21	unknown
Sample 1623	+	B.1.617.2	22.414	S	21A (Delta)	0.0156909	1592.71	ID					NextSeq	2021-10-21	unknown
Sample 1624	+	Could Not Generate	28.915	S	21A (Delta)	0.0652058	557.13	WY					NextSeq	2021-09-21	unknown
Sample 1625	+	B.1.1.7	21.3321	S	20I/501Y.V1	0.00103734	1002.54	NY	20	F	WHITE	NON HISPANIC OR LATINO	NextSeq	2021-04-21	no
Sample 1626	+	B.1.1.7	23.6416	S	20I/501Y.V1	0.00254317	2297.38	MN	51	F	WHITE	NON HISPANIC OR LATINO	NovaSeq	2021-04-21	no
Sample 1627	+	B.1.1.7	23.652	S	20I/501Y.V1	0.00334627	1517.96	MN	6	M	WHITE	NON HISPANIC OR LATINO	NextSeq	2021-05-21	no
Sample 1628	+	B.1.617.2	27.7203	S	21A (Delta)	0.254081	323.02	ID	49	-	White	Not Hispanic or Latino	NextSeq	2021-08-21	unknown
Sample 1629	+	B.1.1.7	24.393	S	20I/501Y.V1	0.00230893	2400.79	MN	28	F	WHITE	DECLINE TO IDENTIFY	NovaSeq	2021-04-21	no
Sample 1630	+	B.1.2	24.5847	S	20G	0.0082266	1008.2	MN	39	M	WHITE	DECLINE TO IDENTIFY	NextSeq	2021-04-21	no
Sample 1631	+	B.1.617.2	12.8296	S	21A (Delta)	0.0025092	2200.51	WA					NextSeq	2021-10-21	unknown
Sample 1632	+	AY.12	25.9397	S	21A (Delta)	0.114925	476.19						NovaSeq	2021-09-21	unknown
Sample 1633	+	B.1.617.2	25.2585	S	21A (Delta)	0.0463273	583.96	ID					NovaSeq	2021-10-21	unknown
Sample 1634	+	B.1.1.7	25.6107	S	20I/501Y.V1	0.0285102	797.77	MN	30	M	WHITE	UNKNOWN	NextSeq	2021-05-21	no
Sample 1635	-	Sample Not Detected	17.6981	S				MN	49	M	WHITE	NON HISPANIC OR LATINO	NovaSeq	2021-04-21	yes
Sample 1636	+	B.1.1.7	24.0451	S	20I/501Y.V1	0.00873377	2321.79	NA		NA	NO INFORMATION	NO INFORMATION	NovaSeq	2021-04-21	no
Sample 1637	+	AY.4	26.1202	S	21A (Delta)	0.0519572	707.89	MN					NextSeq	2021-10-21	unknown
Sample 1638	+	AY.25	25.8219	S	21A (Delta)	0.0605219	771.29	MN					NextSeq	2021-10-21	unknown
Sample 1639	+	B.1.1.7	20.9259	S	20I/501Y.V1	0.0203119	1037.41	MN	40	F	WHITE	NON HISPANIC OR LATINO	NextSeq	2021-05-21	no
Sample 1640	+	B.1.1.7	25.8742	S	20I/501Y.V1	0.0160621	743.2	MN	60	F	WHITE	NON HISPANIC OR LATINO	NextSeq	2021-04-21	no
Sample 1641	+	AY.3	19.1509	S	21A (Delta)	0.0253262	940.13	MN					NovaSeq	2021-10-21	unknown
Sample 1642	+	AY.14	13.3748	S	21A (Delta)	0.0331549	1128.53	CA					NovaSeq	2021-09-21	unknown
Sample 1643	+	B.1.1.7	27.144	S	20I/501Y.V1	0.260899	432.91	MN	39	M	WHITE	NON HISPANIC OR LATINO	NextSeq	2021-05-21	no
Sample 1644	+	AY.25	17.9302	S	21A (Delta)	0.0171934	1550.76	MN					NextSeq	2021-10-21	unknown
Sample 1645	+	B.1.1.7	20.3934	S	20I/501Y.V1	0.00545442	1189.81	MN	27	M	WHITE	NON HISPANIC OR LATINO	NextSeq	2021-04-21	no
Sample 1646	+	B.1.1.7	13.9267	S	20I/501Y.V1	0.00103734	1640.29	MN	33	F	WHITE	NON HISPANIC OR LATINO	NextSeq	2021-04-21	no
Sample 1647	+	B.1.1.7	24.3739	S	20I (ALPHA, V1)	0.00274394	1528.66	WV	45	M	ASIAN	NON HISPANIC OR LATINO	NovaSeq	2021-06-21	no
Sample 1648	+	B.1.551	27.6005	S	21A (Delta)	0.376204	245.4	MN					NovaSeq	2021-08-21	unknown
Sample 1649	+	B.1.1.519	19.0194	S	20B	0.000735712	1379.28	MN	29	M	WHITE	UNKNOWN	NextSeq	2021-04-21	no
Sample 1650	+	AY.25	13.0834	S	21A (Delta)	0.00251147	1924.4	MN					NextSeq	2021-10-21	unknown
Sample 1651	+	B.1.1.7	16.319	S	20I/501Y.V1	0.00103734	1371.7	MN	26	M	WHITE	NON HISPANIC OR LATINO	NextSeq	2021-04-21	no
Sample 1652	+	Could Not Generate	23.1918	S	21A (Delta)	0.00270994	2013.93	ID					NovaSeq	2021-09-21	unknown
Sample 1653	+	B.1.1.7	21.3137	S	20I/501Y.V1	0.00237585	1844.3	MN	27	M	OTHER	UNKNOWN	NovaSeq	2021-05-21	no
Sample 1654	+	B.1.617.2	29.4982	S	21A (Delta)	0.19351	389.99	NJ					NextSeq	2021-08-21	unknown
Sample 1655	+	AY.25	28.7079	S	21A (Delta)	0.00956842	1158.55						NovaSeq	2021-09-21	unknown
Sample 1656	+	B.1.617.2	21.7147	S	21A (Delta)	0.0133489	1453	MN					NextSeq	2021-09-21	unknown
Sample 1657	+	Could Not Generate	15.8732	S	21A (Delta)	0.0029176	1460.29	MN					NextSeq	2021-09-21	unknown
Sample 1658	+	B.1.1.7	18.3904	S	20I/501Y.V1	0.00174006	1255.48	MN	53	M	WHITE	NON HISPANIC OR LATINO	NextSeq	2021-04-21	yes
Sample 1659	+	B.1.1.7	20.8259	S	20I/501Y.V1	0.00257663	1048.31	MN	55	F	WHITE	HISPANIC OR LATINO	NextSeq	2021-04-21	no
Sample 1660	+	B.1.1.7	29.2436	S	20I/501Y.V1	0.134451	941.46	MN	33	F	WHITE	NON HISPANIC OR LATINO	NovaSeq	2021-04-21	no
Sample 1661	+	Could Not Generate	29.149	S	20G	0.571848	421.32	MN	20	M	DECLINE TO IDENTIFY	HISPANIC OR LATINO	NextSeq	2021-04-21	no
Sample 1662	+	AY.25	25.4328	S	21A (Delta)	0.047242	634.2						NovaSeq	2021-09-21	unknown
Sample 1663	+	AY.4	23.0176	S	21A (Delta)	0.0154891	978.33	MN					NextSeq	2021-10-21	unknown
Sample 1664	+	Could Not Generate	20.4374	S	21A (Delta)	0.0088993	1012.52	MN					NextSeq	2021-09-21	unknown
Sample 1665	+	B.1.1.7	14.4496	S	20I/501Y.V1	0.00153929	1601.38	MN	77	F	WHITE	DECLINE TO IDENTIFY	NextSeq	2021-04-21	no
Sample 1666	+	B.1.1.7	25.9829	S	20I/501Y.V1	0.103835	297.06	MN	34	M	WHITE	NON HISPANIC OR LATINO	NextSeq	2021-04-21	no
Sample 1667	+	B.1.1.519	24.2117	S	20B	0.0980759	2289.56	MN	14	F	BLACK	HISPANIC OR LATINO	NextSeq	2021-05-21	no
Sample 1668	+	B.1.427	29.65	S	20C	0.124277	540.48	MN	19	F	BLACK	DECLINE TO IDENTIFY	NextSeq	2021-05-21	no
Sample 1669	+	AY.25	24.0986	S	21A (Delta)	0.0297424	774.92	MN					NextSeq	2021-10-21	unknown
Sample 1670	+	Could Not Generate	22.7866	S	21A (Delta)	0.0114754	1170.88						NextSeq	2021-09-21	unknown
Sample 1671	+	B.1.1.7	29.0704	S	20I/501Y.V1	0.122829	610.05	MN	14	M	WHITE	NON HISPANIC OR LATINO	NextSeq	2021-05-21	no
Sample 1672	+	B.1.526	17.3075	S	20C	0.00150537	1512.39	NJ	41	M	WHITE	NON HISPANIC OR LATINO	NextSeq	2021-04-21	no
Sample 1673	+	AY.25	15.7034	S	21A (Delta)	0.00267648	1605.1	MN					NovaSeq	2021-09-21	unknown
Sample 1674	+	B.1.617.2	23.8841	S	21A (Delta)	0.0195718	778.13	MN					NovaSeq	2021-09-21	unknown
Sample 1675	+	AY.3	21.6365	S	21A (Delta)	0.0152148	1211.32	MN					NextSeq	2021-10-21	unknown
Sample 1676	+	AY.4	18.735	S	21A (Delta)	0.0112078	1440.11	MN					NextSeq	2021-09-21	unknown
Sample 1677	+	AY.3	22.0933	S	21A (Delta)	0.0170291	2581.96	MN					NovaSeq	2021-10-21	unknown
Sample 1678	+	B.1.1.7	24.7623	S	20I/501Y.V1	0.0123477	965.27	MN	12	F	OTHER	HISPANIC OR LATINO	NextSeq	2021-05-21	no
Sample 1679	+	B.1.617.2	17.3113	S	21A (Delta)	0.00558715	1697.84	MN					NextSeq	2021-10-21	unknown
Sample 1680	+	B.1.1.7	27.899	S	20I (ALPHA, V1)	0.230193	563.96	MN	23	M	BLACK	DECLINE TO IDENTIFY	NextSeq	2021-06-21	yes
Sample 1681	+	B.1.1.7	21.4317	S	20I/501Y.V1	0.00311203	1142.2	MN	17	F	WHITE	DECLINE TO IDENTIFY	NextSeq	2021-04-21	no
Sample 1682	+	AY.4	23.1633	S	21A (Delta)	0.00344597	1219.52	MN					NextSeq	2021-09-21	unknown
Sample 1683	+	B.1.1.7	24.1801	S	20I/501Y.V1	0.0114443	753.91	MN	47	F	DECLINE TO IDENTIFY	DECLINE TO IDENTIFY	NextSeq	2021-04-21	no
Sample 1684	+	AY.4	20.2397	S	21A (Delta)	0.00244229	2556.53	MN					NovaSeq	2021-10-21	unknown
Sample 1685	+	AY.4	24.7001	S	21A (Delta)	0.0158916	1785.41	MN					NovaSeq	2021-10-21	unknown
Sample 1686	+	B.1.1.7	28.4965	S	20I/501Y.V1	0.246954	821.4	MN	63	M	WHITE	UNKNOWN	NovaSeq	2021-04-21	no
Sample 1687	+	A	28.5088	S	21A (Delta)	0.234881	245.85	MN					NextSeq	2021-10-21	unknown
Sample 1688	+	Could Not Generate	14.8003	S	21A (Delta)	0.00247583	1767.76	MN					NextSeq	2021-09-21	unknown
Sample 1689	-	Sample Not Detected	26.8533	S				MN	41	M	BLACK	UNKNOWN	NovaSeq	2021-04-21	no
Sample 1690	+	B.1.617.2	16.7143	S	21A (Delta)	0.0025092	2008.97	MN					NextSeq	2021-10-21	unknown
Sample 1691	+	B.1.617.2	22.4058	S	21A (Delta)	0.019003	1529.28	MN					NextSeq	2021-09-21	unknown
Sample 1692	+	B.1.1.7	23.5653	S	20I/501Y.V1	0.00153929	1159.27	MN	25	F	WHITE	NON HISPANIC OR LATINO	NextSeq	2021-04-21	no
Sample 1693	+	B.1.429	25.5069	S	20C	0.0119052	996.28	MN	30	M	DECLINE TO IDENTIFY	HISPANIC OR LATINO	NextSeq	2021-04-21	no
Sample 1694	+	B.1.1.7	24.9568	S	20I/501Y.V1	0.0840584	497.82	NJ	56	M	DECLINE TO IDENTIFY	HISPANIC OR LATINO	NextSeq	2021-04-21	no
Sample 1695	+	AY.25	27.6741	S	21A (Delta)	0.0699231	518.89	SC					NextSeq	2021-09-21	unknown
Sample 1696	+	AY.4	20.3104	S	21A (Delta)	0.0131817	1132.48	MN					NextSeq	2021-10-21	unknown
Sample 1697	+	AY.4	27.9336	S	21A (Delta)	0.0531281	751.73	NM					NextSeq	2021-10-21	unknown
Sample 1698	+	B.1.617.2	20.5909	S	21A (Delta)	0.00294413	1091.67	NM					NovaSeq	2021-09-21	unknown
Sample 1699	+	B.1.617.2	26.8501	S	21A (Delta)	0.174806	410.4	NM					NextSeq	2021-10-21	unknown
Sample 1700	+	B.1.1.7	23.6189	S	20I/501Y.V1	0.00110427	3199.89	MN	35	M	WHITE	HISPANIC OR LATINO	NovaSeq	2021-04-21	no
Sample 1701	+	AY.12	28.1827	S	21A (Delta)	0.237222	396.49						NextSeq	2021-09-21	unknown
Sample 1702	+	B.1.526.1	26.3271	S	20C	0.124557	421.57	MN	40	M	BLACK	DECLINE TO IDENTIFY	NextSeq	2021-04-21	no
Sample 1703	+	AY.4	23.1831	S	21A (Delta)	0.0171964	902.61	MN					NextSeq	2021-10-21	unknown
Sample 1704	+	AY.3	25.3016	S	21A (Delta)	0.0546671	757.33	MN					NextSeq	2021-08-21	unknown
Sample 1705	+	B.1.1.7	15.9437	S	20I/501Y.V1	0.000234239	2942.39	MN	17	F	WHITE	NON HISPANIC OR LATINO	NovaSeq	2021-04-21	no
Sample 1706	+	B.1.1.7	18.6903	S	20I/501Y.V1	0.01121	1459.38	MN	16	F	OTHER	HISPANIC OR LATINO	NextSeq	2021-05-21	no
Sample 1707	+	B.1.1.7	25.7589	S	20I/501Y.V1	0.0039486	1138.93	MN	29	M	WHITE	NON HISPANIC OR LATINO	NextSeq	2021-04-21	no
Sample 1708	+	AY.4	23.1627	S	21A (Delta)	0.041933	591.28	NM					NextSeq	2021-10-21	unknown
Sample 1709	+	B.1.526.1	17.4548	S	20C	0.000802944	1487.66	NJ	57	M	WHITE	NON HISPANIC OR LATINO	NextSeq	2021-04-21	no
Sample 1710	+	B.1.617.2	19.0184	S	21A (Delta)	0.0168953	1571.4	MN					NextSeq	2021-10-21	unknown
Sample 1711	+	B.1.617.2	21.883	S	21A (Delta)	0.0101037	1450.06	MN					NextSeq	2021-10-21	unknown
Sample 1712	+	B.1.1.7	18.5573	S	20I/501Y.V1	0.00799759	1174.08	NA		NA	NO INFORMATION	NO INFORMATION	NextSeq	2021-04-21	no
Sample 1713	+	B.1.1.7	26.5743	S	20I (ALPHA, V1)	0.00729487	1106.17	MN	34	F	BLACK	UNKNOWN	NovaSeq	2021-06-21	no
Sample 1714	+	B.1.1.7	21.9972	S	20I/501Y.V1	0.00786374	2947.17	MN	43	M	WHITE	NON HISPANIC OR LATINO	NovaSeq	2021-04-21	yes
Sample 1715	+	B.1.1.7	13.1597	S	20I/501Y.V1	0.000200776	2993.08	MN	37	F	WHITE	NON HISPANIC OR LATINO	NovaSeq	2021-04-21	no
Sample 1716	+	AY.4	19.5374	S	21A (Delta)	0.00244229	1431.6	MN					NextSeq	2021-10-21	unknown
Sample 1717	+	B.1.1.7	25.3186	S	20I/501Y.V1	0.0222862	1124.76	NA		NA	NO INFORMATION	NO INFORMATION	NextSeq	2021-05-21	no
Sample 1718	+	B	26.1348	S	19A	0.429221	488.44	MN					NovaSeq	2021-10-21	unknown
Sample 1719	+	AY.25	24.1786	S	21A (Delta)	0.0192037	934.93	MN					NextSeq	2021-09-21	unknown
Sample 1720	+	B.1.617.2	29.2783	S	21A (Delta)	0.435745	346.96	MN					NextSeq	2021-10-21	unknown
Sample 1721	+	AY.4	22.2662	S	21A (Delta)	0.00749415	2447.49	MN					NovaSeq	2021-10-21	unknown
Sample 1722	+	B.1.1.519	18.9716	S	20B	0.00458148	815.98	MN	31	F	WHITE	NON HISPANIC OR LATINO	NextSeq	2021-04-21	no
Sample 1723	+	AY.3	24.0717	S	21A (Delta)	0.0154901	1371.17	MN					NextSeq	2021-10-21	unknown
Sample 1724	+	B.1.617.2	28.6922	S	21A (Delta)	0.332586	369.1	MN					NovaSeq	2021-10-21	unknown
Sample 1725	+	AY.4	21.6739	S	21A (Delta)	0.00237538	2022.39	MN					NovaSeq	2021-10-21	unknown
Sample 1726	+	Could Not Generate	19.478	S	21A (Delta)	0.00274339	1506.51	MN					NextSeq	2021-09-21	unknown
Sample 1727	+	B.1.1.7	16.625	S	20I/501Y.V1	0.000836568	1456.6	WI	34	M	BLACK	DECLINE TO IDENTIFY	NextSeq	2021-04-21	no
Sample 1728	+	Could Not Generate	29.6203	S	20A	0.562082	181.5	ID					NextSeq	2021-10-21	unknown
Sample 1729	+	B.1.1.7	23.767	S	20I/501Y.V1	0.00234239	2509.51	NA		NA	NO INFORMATION	NO INFORMATION	NovaSeq	2021-04-21	no
Sample 1730	+	AY.12	25.8751	S	21A (Delta)	0.023185	904.66						NovaSeq	2021-09-21	unknown
Sample 1731	+	B.1.617.2	22.8167	S	21A (Delta)	0.00224155	2285.49	MN					NovaSeq	2021-10-21	unknown
Sample 1732	+	B.1.1.7	23.1455	S	20I/501Y.V1	0.0025097	2565.56	MN	30	U	DECLINE TO IDENTIFY	DECLINE TO IDENTIFY	NovaSeq	2021-05-21	no
Sample 1733	+	B.1.1.7	25.7617	S	20I/501Y.V1	0.0011712	2440.68	NJ	5	F	WHITE	NON HISPANIC OR LATINO	NovaSeq	2021-04-21	no
Sample 1734	+	B.1.1.7	20.1424	S	20I/501Y.V1	0.0011712	2857.48	MN	31	M	OTHER	NON HISPANIC OR LATINO	NovaSeq	2021-04-21	yes
Sample 1735	+	B.1.1.7	26.9289	S	20I/501Y.V1	0.0347343	833.58	MN	22	M	WHITE	NON HISPANIC OR LATINO	NextSeq	2021-05-21	no
Sample 1736	+	AY.25	21.4047	S	21A (Delta)	0.010639	1652.81	MN					NextSeq	2021-10-21	unknown
Sample 1737	+	AY.25	21.7728	S	21A (Delta)	0.0275343	1417.56	MN					NextSeq	2021-10-21	unknown
Sample 1738	+	B.1.1.7	24.2602	S	20I/501Y.V1	0.0105073	1236.34	MN	21	M	WHITE	DECLINE TO IDENTIFY	NextSeq	2021-04-21	no
Sample 1739	+	AY.3	22.4221	S	21A (Delta)	0.00746144	2298.9	MN					NovaSeq	2021-10-21	unknown
Sample 1740	+	B.1.1.7	26.1014	S	20I/501Y.V1	0.0264356	683.89	NJ	9	F	OTHER	HISPANIC OR LATINO	NextSeq	2021-04-21	no
Sample 1741	+	AY.12	27.4434	S	21A (Delta)	0.0967688	681.41	MN					NextSeq	2021-09-21	unknown
Sample 1742	+	AY.3	29.5256	S	21A (Delta)	0.250318	314.89	MN					NextSeq	2021-07-21	unknown
Sample 1743	+	B.1.1.7	26.9184	S	20I/501Y.V1	0.0231562	729.55	MN	48	F	WHITE	UNKNOWN	NextSeq	2021-04-21	no
Sample 1744	+	AY.3.1	11.5281	S	21A (Delta)	0.00354634	2277.78	MN					NextSeq	2021-09-21	unknown
Sample 1745	+	B.1.1.7	24.8123	S	20I/501Y.V1	0.0019743	1078.91	NA		NA	NO INFORMATION	NO INFORMATION	NextSeq	2021-04-21	unknown
Sample 1746	+	B.1.526	21.7269	S	20C	0.0019068	1420.26	ID	7	F	WHITE	NON HISPANIC OR LATINO	NextSeq	2021-04-21	no
Sample 1747	+	B.1.526.2	24.3344	S	21F (IOTA)	0.0158018	1466.24	MN	37	M	WHITE	NON HISPANIC OR LATINO	NovaSeq	2021-06-21	no
Sample 1748	+	AY.5	23.1009	S	21A (Delta)	0.109078	887.68	WI					NovaSeq	2021-09-21	unknown
Sample 1749	+	B.1.1.7	22.7115	S	20I/501Y.V1	0.0126824	1413.15	MN	37	M	BLACK	NON HISPANIC OR LATINO	NextSeq	2021-05-21	no
Sample 1750	+	B.1.617.2	19.4387	S	21A (Delta)	0.0132151	1047.92	MN					NovaSeq	2021-09-21	unknown
Sample 1751	+	B.1.1.7	19.7601	S	20I/501Y.V1	0.00153929	1241.37	MN	27	F	WHITE	NON HISPANIC OR LATINO	NextSeq	2021-04-21	no
Sample 1752	+	B.1.617.2	20.0831	S	21A (Delta)	0.00267648	1195.05	MN					NovaSeq	2021-08-21	unknown
Sample 1753	+	B.1.1.7	23.6497	S	20I/501Y.V1	0.00291126	1226.88	MN	28	M	WHITE	DECLINE TO IDENTIFY	NextSeq	2021-05-21	no
Sample 1754	+	B.1.617.2	13.0698	S	21A (Delta)	0.00244229	1664.87						NovaSeq	2021-09-21	unknown
Sample 1755	+	B.1.1.7	27.0963	S	20I (ALPHA, V1)	0.442056	483.05	MN	21	M	DECLINE TO IDENTIFY	HISPANIC OR LATINO	NovaSeq	2021-05-21	yes
Sample 1756	+	AY.12	25.8554	S	21A (Delta)	0.150351	379.8						NextSeq	2021-08-21	unknown
Sample 1757	+	B.1.1.334	26.7095	S	20A	0.0107681	1721.36	MN	24	F	WHITE	NON HISPANIC OR LATINO	NovaSeq	2021-04-21	no
Sample 1758	+	AY.39	24.2606	S	21A (Delta)	0.031318	988.84	MN					NovaSeq	2021-10-21	unknown
Sample 1759	+	B.1.617.2	18.306	S	21A (Delta)	0.00284376	1247.25	MN					NovaSeq	2021-09-21	unknown
Sample 1760	+	B.1.1.7	27.1064	S	20I/501Y.V1	0.0696359	693.43	MN	15	M	WHITE	NON HISPANIC OR LATINO	NextSeq	2021-05-21	no
Sample 1761	+	B.1.617.2	15.142	S	21A (Delta)	0.0103045	1182.84	PA					NovaSeq	2021-09-21	unknown
Sample 1762	+	B.1.1.7	23.1021	S	20I/501Y.V1	0.01034	1256.84	NA		NA	NO INFORMATION	NO INFORMATION	NextSeq	2021-04-21	no
Sample 1763	+	AY.3	13.0353	S	21A (Delta)	0.00839746	1777.32	NY					NextSeq	2021-08-21	unknown
Sample 1764	+	B.1.1.7	21.1406	S	20I/501Y.V1	0.00123812	2853.12	MN	33	M	WHITE	NON HISPANIC OR LATINO	NovaSeq	2021-04-21	no
Sample 1765	+	B.1.1.7	22.4218	S	20I/501Y.V1	0.337803	1020.05	MN	23	F	BLACK	UNKNOWN	NextSeq	2021-04-21	no
Sample 1766	+	AY.3	21.9483	S	21A (Delta)	0.0328203	2594	MN					NovaSeq	2021-10-21	unknown
Sample 1767	+	B.1.1.519	24.8533	S	20B	0.0226276	830.62	MN	59	F	WHITE	NON HISPANIC OR LATINO	NextSeq	2021-04-21	no
Sample 1768	+	B.1.1.7	24.6611	S	20I/501Y.V1	0.024227	888.44	MN	19	F	BLACK	NON HISPANIC OR LATINO	NextSeq	2021-04-21	no
Sample 1769	+	B.1.1.7	22.6399	S	20I/501Y.V1	0.002242	1351.38	MN	7	M	BLACK	DECLINE TO IDENTIFY	NovaSeq	2021-05-21	no
Sample 1770	+	B.1.575	21.2629	S	20C	0.00702318	2478.35	MN	12	M	BLACK	NON HISPANIC OR LATINO	NovaSeq	2021-04-21	no
Sample 1771	+	B.1.1.7	20.7087	S	20I/501Y.V1	0.0175345	1017.44	NA		NA	NO INFORMATION	NO INFORMATION	NextSeq	2021-04-21	no
Sample 1772	+	AY.12	22.3063	S	21A (Delta)	0.00996989	1223.64	MN					NextSeq	2021-08-21	unknown
Sample 1773	+	B.1.617.2	18.3425	S	21A (Delta)	0.0136166	1119.7	MN					NovaSeq	2021-09-21	unknown
Sample 1774	+	AY.3.1	24.1035	S	21A (Delta)	0.044127	1421.24	OH					NextSeq	2021-09-21	unknown
Sample 1775	+	Could Not Generate	14.9473	S	21A (Delta)	0.00314486	1472.26	MN					NextSeq	2021-09-21	unknown
Sample 1776	+	Could Not Generate	17.1654	S	21A (Delta)	0.00237538	1615.61	MN					NextSeq	2021-09-21	unknown
Sample 1777	+	B.1.1.7	20.8867	S	20I/501Y.V1	0.00281087	1428.53	MN	11	M	WHITE	NON HISPANIC OR LATINO	NextSeq	2021-05-21	no
Sample 1778	+	AY.25	27.1926	S	21A (Delta)	0.200636	219.44	FL					NovaSeq	2021-09-21	unknown
Sample 1779	+	B.1.617.2	22.2734	S	21A (Delta)	0.0243225	989.57	MN					NovaSeq	2021-10-21	unknown
Sample 1780	+	B.1.429	24.9575	S	20C	0.00230746	2060.93	MN	21	F	WHITE	DECLINE TO IDENTIFY	NovaSeq	2021-05-21	no
Sample 1781	+	B.1.1.7	23.3248	S	20I/501Y.V1	0.0136863	881.14	MN	19	F	ASIAN	NON HISPANIC OR LATINO	NextSeq	2021-05-21	no
Sample 1782	+	B.1.1.7	17.6664	S	20I/501Y.V1	0.00247624	2724.9	MN	33	M	BLACK	NON HISPANIC OR LATINO	NovaSeq	2021-05-21	no
Sample 1783	+	B.1.617.2	20.7888	S	21A (Delta)	0.0105052	1211.72	WI					NextSeq	2021-09-21	unknown
Sample 1784	+	P.1	12.3797	S	20J/501Y.V3	0.0185631	1482.18	MN	14	M	WHITE	UNKNOWN	NextSeq	2021-05-21	no
Sample 1785	+	B.1.1.7	21.6743	S	20I/501Y.V1	0.00160621	1128.43	MN	26	F	WHITE	NON HISPANIC OR LATINO	NextSeq	2021-04-21	no
Sample 1786	+	AY.25	28.5242	S	21A (Delta)	0.279402	380.62	MN					NextSeq	2021-10-21	unknown
Sample 1787	+	B.1.617.2	18.8296	S	21A (Delta)	0.0179312	1958.96	MN					NextSeq	2021-07-21	unknown
Sample 1788	+	B.1.617.2	26.154	S	21A (Delta)	0.0771238	492.98	MN					NextSeq	2021-08-21	unknown
Sample 1789	+	B.1.351	23.6573	S	20H/501Y.V2	0.00719424	1762.45	MN	12	F	DECLINE TO IDENTIFY	DECLINE TO IDENTIFY	NovaSeq	2021-05-21	no
Sample 1790	+	AY.4	22.4132	S	21A (Delta)	0.0302777	874.29	MN					NextSeq	2021-09-21	unknown
Sample 1791	+	B.1.1.7	23.1324	S	20I/501Y.V1	0.0115377	1228.35	MN	68	F	ASIAN	DECLINE TO IDENTIFY	NextSeq	2021-05-21	yes
Sample 1792	+	B.1.617.2	18.3226	S	21A (Delta)	0.00277685	1963.96	MN					NextSeq	2021-08-21	unknown
Sample 1793	+	AY.12	17.689	S	21A (Delta)	0.0204751	1074.09	NM					NextSeq	2021-09-21	unknown
Sample 1794	+	AY.25	19.4282	S	21A (Delta)	0.00548678	2342	MN					NovaSeq	2021-10-21	unknown
Sample 1795	+	B.1.1.7	19.5513	S	20I/501Y.V1	0.00297818	1196.1	MN	13	F	WHITE	NON HISPANIC OR LATINO	NextSeq	2021-05-21	no
Sample 1796	+	B.1.1.7	16.173	S	20I/501Y.V1	0.000702717	3119.16	MN	86	F	WHITE	NON HISPANIC OR LATINO	NovaSeq	2021-04-21	no
Sample 1797	+	B.1.617.2	19.5894	S	21A (Delta)	0.0113416	2088.96						NovaSeq	2021-07-21	unknown
Sample 1798	+	B.1.617.2	27.2688	S	21A (Delta)	0.0989095	354.91	MN					NextSeq	2021-09-21	unknown
Sample 1799	+	AY.25	15.5472	S	21A (Delta)	0.0127802	1587.49	MN					NextSeq	2021-09-21	unknown
Sample 1800	+	B.1.1.7	22.5681	S	20I/501Y.V1	0.00689332	1029.93	MN	29	M	BLACK	HISPANIC OR LATINO	NextSeq	2021-05-21	no
Sample 1801	+	B.1.526.1	23.4632	S	20C	0.0196393	785.89	NJ	56	F	DECLINE TO IDENTIFY	DECLINE TO IDENTIFY	NextSeq	2021-04-21	no
Sample 1802	+	B.1.617.2	24.5224	S	21A (Delta)	0.0956842	409.58	MN					NextSeq	2021-10-21	unknown
Sample 1803	+	B.1.1.7	20.7257	S	20I/501Y.V1	0.00163967	1391.41	MN	30	M	AMERICAN INDIAN OR ALASKAN TIVE	DECLINE TO IDENTIFY	NextSeq	2021-04-21	no
Sample 1804	+	B.1.429	19.6659	S	20C	0.0164888	1544.72	MN	57	F	WHITE	NON HISPANIC OR LATINO	NextSeq	2021-04-21	no
Sample 1805	+	B.1.1.7	23.9579	S	20I/501Y.V1	0.00337973	1261.17	MN	37	M	WHITE	UNKNOWN	NextSeq	2021-05-21	yes
Sample 1806	+	B.1.1.372	26.1376	S	20C	0.198642	801.3	NA		NA	NO INFORMATION	NO INFORMATION	NextSeq	2021-05-21	unknown
Sample 1807	+	B.1	18.2594	S	20A	0.0101706	2427.74	MN	34	M	ASIAN	UNKNOWN	NovaSeq	2021-05-21	no
Sample 1808	+	Could Not Generate	21.5593	S	19A	0.631132	202.57	WY					NextSeq	2021-09-21	unknown
Sample 1809	+	AY.12	22.7759	S	21A (Delta)	0.0644427	608.4	OH					NextSeq	2021-08-21	unknown
Sample 1810	+	B.1.617.2	21.5293	S	21A (Delta)	0.00990298	1411.56	MN					NovaSeq	2021-08-21	unknown
Sample 1811	+	AY.24	27.3131	S	21A (Delta)	0.049013	628.13	MN					NextSeq	2021-09-21	unknown
Sample 1812	+	B.1.617.2	29.2657	S	21A (Delta)	0.243678	475.64	MN					NextSeq	2021-10-21	unknown
Sample 1813	+	B.1.617.2	22.0647	S	21A (Delta)	0.00291067	1361.31	MN					NextSeq	2021-09-21	unknown
Sample 1814	+	B.1.526	25.5647	S	20C	0.0491419	1084.99	NA		NA	NO INFORMATION	NO INFORMATION	NextSeq	2021-04-21	no
Sample 1815	+	B.1.1.7	17.241	S	20I/501Y.V1	0.00271048	1496.15	MN	51	M	DECLINE TO IDENTIFY	DECLINE TO IDENTIFY	NextSeq	2021-05-21	no
Sample 1816	+	AY.39	15.403	S	21A (Delta)	0.0237538	819.8	MN					NovaSeq	2021-10-21	unknown
Sample 1817	+	AY.12	12.9202	S	21A (Delta)	0.00247574	1984.22	MN					NovaSeq	2021-08-21	unknown
Sample 1818	+	B.1.1.7	21.6702	S	20I/501Y.V1	0.00317896	1099.4	MN	10	F	WHITE	NON HISPANIC OR LATINO	NextSeq	2021-04-21	no
Sample 1819	+	B.1.526.2	14.8493	S	20C	0.0024774	1702.21	NJ	46	M	OTHER	HISPANIC OR LATINO	NextSeq	2021-05-21	no
Sample 1820	+	B.1.617.2	15.6918	S	21A (Delta)	0.0128497	1812.59	PA					NextSeq	2021-10-21	unknown
Sample 1821	+	B.1.1.7	25.2565	S	20I/501Y.V1	0.0111765	1021.03	MN	33	F	WHITE	NON HISPANIC OR LATINO	NextSeq	2021-04-21	no
Sample 1822	+	B.1.1.7	22.3103	S	20I (ALPHA, V1)	0.00588944	1672.76	MN		NA	NO INFORMATION	NO INFORMATION	NextSeq	2021-06-21	no
Sample 1823	+	AY.44	17.877	S	21A (Delta)	0.205331	1187.13	ID					NextSeq	2021-10-21	unknown
Sample 1824	+	Could Not Generate	28.2149	S	21A (Delta)	0.228121	367.24	CT					NovaSeq	2021-08-21	unknown
Sample 1825	+	B.1.1.7	15.7006	S	20I/501Y.V1	0.000903493	1547.39	MN	39	M	WHITE	NON HISPANIC OR LATINO	NextSeq	2021-04-21	no
Sample 1826	+	AY.39	27.0121	S	21A (Delta)	0.0169957	1186.33	MN					NovaSeq	2021-10-21	unknown
Sample 1827	+	B.1.617.2	19.6942	S	21A (Delta)	0.00284376	905.25	MN					NovaSeq	2021-08-21	unknown
Sample 1828	+	B.1.1.7	18.3338	S	20I/501Y.V1	0.00254317	1219.75	MN	8	F	WHITE	NON HISPANIC OR LATINO	NextSeq	2021-05-21	no
Sample 1829	+	B.1.617.2	24.879	S	21A (Delta)	0.00970224	2229.67	MN					NovaSeq	2021-10-21	unknown
Sample 1830	+	B	27.1061	S	20A	0.0233142	606.24	ID					NovaSeq	2021-10-21	unknown
Sample 1831	+	B.1.617.2	18.6832	S	21A (Delta)	0.010639	1572.87	MN					NextSeq	2021-10-21	unknown
Sample 1832	+	AY.4	25.5762	S	21A (Delta)	0.0562061	549.18	MN					NextSeq	2021-10-21	unknown
Sample 1833	+	P.1	20.608	S	20J/501Y.V3	0.00598702	1296.19	NJ	40	F	NO INFORMATION	NO INFORMATION	NextSeq	2021-04-21	unknown
Sample 1834	+	AY.26	28.3693	S	21A (Delta)	0.190354	271.94	WY					NextSeq	2021-10-21	unknown
Sample 1835	+	B.1.1.7	23.9826	S	20I (ALPHA, V1)	0.00431669	1317.28	MN	10	F	ASIAN	NON HISPANIC OR LATINO	NextSeq	2021-06-21	no
Sample 1836	+	B.1.617.2	27.9294	S	21A (Delta)	0.175963	380.31	WV					NextSeq	2021-10-21	unknown
Sample 1837	+	B.1.1.7	20.8588	S	20I/501Y.V1	0.0170325	731.77	MN	23	U	WHITE	NON HISPANIC OR LATINO	NextSeq	2021-04-21	no
Sample 1838	+	B.1.617.2	21.5882	S	21A (Delta)	0.0109566	1553.53	ID					NextSeq	2021-10-21	unknown
Sample 1839	+	AY.4	28.6643	S	21A (Delta)	0.0849271	539.64	MN					NextSeq	2021-08-21	unknown
Sample 1840	+	B.1.1.7	28.5842	S	20I/501Y.V1	0.393477	573.7	NJ	25	M	WHITE	NON HISPANIC OR LATINO	NextSeq	2021-04-21	no
Sample 1841	+	B.1.1.7	28.6168	S	20A	0.386332	385.36	MN	36	F	WHITE	NON HISPANIC OR LATINO	NextSeq	2021-04-21	no
Sample 1842	+	B.1.617.2	28.1726	S	21A (Delta)	0.402925	338.35	CA					NextSeq	2021-07-21	unknown
Sample 1843	+	B.1.1.7	24.4252	S	20I/501Y.V1	0.00378129	1176.22	NA		NA	NO INFORMATION	NO INFORMATION	NextSeq	2021-04-21	no
Sample 1844	+	P.1	27.0414	S	20J (GAMMA, V3)	0.0530136	722.49	MN	46	M	WHITE	HISPANIC OR LATINO	NovaSeq	2021-06-21	yes
Sample 1845	+	B.1.617.2	16.4367	S	21A (Delta)	0.00642355	1485.09	MN					NovaSeq	2021-09-21	unknown
Sample 1846	+	B.1.1.7	17.3749	S	20I/501Y.V1	0.00157275	1299.02	MN	27	M	DECLINE TO IDENTIFY	DECLINE TO IDENTIFY	NextSeq	2021-04-21	no
Sample 1847	+	B.1.621	21.255	S	20A	0.00244131	1912.77	MN					NovaSeq	2021-08-21	unknown
Sample 1848	+	B.1.2	27.8911	S	20G	0.00404642	1884.91	NA		NA	NO INFORMATION	NO INFORMATION	NovaSeq	2021-04-21	no
Sample 1849	+	B.1.1.7	27.8507	S	20I/501Y.V1	0.372763	274.99	WI	58	M	WHITE	DECLINE TO IDENTIFY	NextSeq	2021-05-21	no
Sample 1850	+	B.1.617.2	21.9947	S	21A (Delta)	0.00839746	2630.67	MN					NovaSeq	2021-10-21	unknown
Sample 1851	+	B.1.1.7	29.8944	S	20I/501Y.V1	0.353154	568.66	MN	21	M	OTHER	HISPANIC OR LATINO	NextSeq	2021-05-21	no
Sample 1852	+	AY.3	18.8045	S	21A (Delta)	0.00916695	2102.79	MN					NovaSeq	2021-07-21	unknown
Sample 1853	+	B.1.1.7	25.4188	S	20I/501Y.V1	0.0233562	866.9	MN	14	F	WHITE	NON HISPANIC OR LATINO	NextSeq	2021-05-21	no
Sample 1854	+	AY.4	19.13	S	21A (Delta)	0.00960187	1210.24	MN					NextSeq	2021-08-21	unknown
Sample 1855	+	AY.23	22.5449	S	21A (Delta)	0.381634	712.26						NovaSeq	2021-09-21	unknown
Sample 1856	+	B.1.526	20.8978	S	20C	0.0115746	1117.22	NJ	71	F	WHITE	NON HISPANIC OR LATINO	NextSeq	2021-04-21	no
Sample 1857	+	P.2	21.6494	S	20B	0.00120389	2487.88	PA	20	F	AMERICAN INDIAN OR ALASKAN TIVE	HISPANIC OR LATINO	NovaSeq	2021-04-21	no
Sample 1858	+	AY.4	18.5115	S	21A (Delta)	0.00264302	1598.95	PA					NextSeq	2021-10-21	unknown
Sample 1859	+	Could Not Generate	23.4858	S	19A	0.574257	234.37	MN					NextSeq	2021-10-21	unknown
Sample 1860	+	Could Not Generate	24.1503	S	19A	0.715438	198.43	NA		NA	NO INFORMATION	NO INFORMATION	NextSeq	2021-04-21	no
Sample 1861	+	B.1.526	21.785	S	20C	0.00307764	1322.72	MN	20	M	OTHER	HISPANIC OR LATINO	NextSeq	2021-05-21	no
Sample 1862	+	AY.12	25.7027	S	21A (Delta)	0.139478	322.57	MN					NextSeq	2021-08-21	unknown
Sample 1863	+	B.1.1.7	22.7918	S	20I/501Y.V1	0.00147236	1061.83	MN	45	F	WHITE	NON HISPANIC OR LATINO	NextSeq	2021-04-21	no
Sample 1864	+	AY.4	24.6976	S	21A (Delta)	0.0247574	1261.02	MN					NextSeq	2021-10-21	unknown
Sample 1865	+	B.1.617.2	29.0651	S	21A (Delta)	0.314547	491.02	MN					NextSeq	2021-09-21	unknown
Sample 1866	+	B.1.617.2	22.3629	S	21A (Delta)	0.011442	1245.29	MD	69	Female	White	Not Hispanic or Latino	NextSeq	2021-09-21	unknown
Sample 1867	-	Sample Not Detected	25.5988	S				MN	18	M	WHITE	NON HISPANIC OR LATINO	NovaSeq	2021-06-21	no
Sample 1868	+	AY.4	24.861	S	21A (Delta)	0.0415106	1233.93	WV					NovaSeq	2021-09-21	unknown
Sample 1869	+	AY.3	22.8817	S	21A (Delta)	0.053998	571.08	MN					NovaSeq	2021-09-21	unknown
Sample 1870	+	B.1.617.2	22.8695	S	21A (Delta)	0.0253262	1264.64	MN					NovaSeq	2021-09-21	unknown
Sample 1871	+	B.1.617.2	27.7011	S	21A (Delta)	0.424261	430.29	NM					NextSeq	2021-09-21	unknown
Sample 1872	+	B.1.526	22.0839	S	20C	0.00153882	1456.57	NA		NA	NO INFORMATION	NO INFORMATION	NextSeq	2021-04-21	unknown
Sample 1873	+	B.1.617.2	19.3218	S	21A (Delta)	0.00230846	1707.2	OH					NextSeq	2021-10-21	unknown
Sample 1874	+	AY.4	21.6802	S	21A (Delta)	0.00963533	1189.46	VA					NextSeq	2021-09-21	unknown
Sample 1875	+	AY.25	18.5395	S	21A (Delta)	0.0185012	1398.73	MN					NextSeq	2021-09-21	unknown
Sample 1876	+	B.1.1.7	22.2574	S	20I/501Y.V1	0.00267702	1590.45	MN	11	F	OTHER	HISPANIC OR LATINO	NextSeq	2021-05-21	no
Sample 1877	+	B.1.1.7	20.4836	S	20I/501Y.V1	0.00234239	2249.78	MN	30	M	WHITE	NON HISPANIC OR LATINO	NovaSeq	2021-05-21	no
Sample 1878	+	B.1.1.7	25.5729	S	20I/501Y.V1	0.0208138	496.33	MN	20	F	WHITE	NON HISPANIC OR LATINO	NextSeq	2021-04-21	no
Sample 1879	+	B.1.1.7	25.1217	S	20I/501Y.V1	0.0149913	1099.61	WA	20	M	WHITE	UNKNOWN	NextSeq	2021-04-21	no
Sample 1880	+	P.1	20.7388	S	20J/501Y.V3	0.00929828	1135.37	MN	37	M	ASIAN	UNKNOWN	NextSeq	2021-04-21	no
Sample 1881	+	AY.12	24.2397	S	21A (Delta)	0.154734	498.08						NovaSeq	2021-09-21	unknown
Sample 1882	+	B.1.1.7	21.2931	S	20I/501Y.V1	0.00284452	1353.92	MN	8	F	WHITE	NON HISPANIC OR LATINO	NextSeq	2021-04-21	no
Sample 1883	+	B.1.526	27.8701	S	20C	0.011675	1337.44	NJ	62	M	OTHER	HISPANIC OR LATINO	NextSeq	2021-04-21	no
Sample 1884	+	AY.4	19.199	S	21A (Delta)	0.0148545	1354.97	AR					NextSeq	2021-08-21	unknown
Sample 1885	+	B.1.1.7	22.6515	S	20I/501Y.V1	0.00103734	2770.71	MN	29	F	BLACK	NON HISPANIC OR LATINO	NovaSeq	2021-04-21	no
Sample 1886	+	AY.20	28.2839	S	21A (Delta)	0.391773	507.47	MN					NextSeq	2021-10-21	unknown
Sample 1887	+	B.1.1.7	22.3054	S	20I/501Y.V1	0.258147	504.6	MN	18	M	WHITE	UNKNOWN	NextSeq	2021-05-21	no
Sample 1888	+	B.1.617.2	23.1976	S	21A (Delta)	0.0121111	859.58	MS					NextSeq	2021-08-21	unknown
Sample 1889	+	AY.4	22.606	S	21A (Delta)	0.0272332	840.98	MN					NextSeq	2021-10-21	unknown
Sample 1890	+	B.1.429	21.8511	S	20C	0.00896231	1307.97	MN	45	M	WHITE	NON HISPANIC OR LATINO	NextSeq	2021-04-21	no
Sample 1891	+	AY.3.1	28.4288	S	21A (Delta)	0.0397779	924.45	OH					NextSeq	2021-09-21	unknown
Sample 1892	+	AY.7.1	25.8272	S	21A (Delta)	0.270745	291.81	MN					NextSeq	2021-10-21	unknown
Sample 1893	+	AY.20	29.025	S	21A (Delta)	0.252007	727.47	MN					NovaSeq	2021-09-21	unknown
Sample 1894	+	AY.14	19.6619	S	21A (Delta)	0.0361659	1336.95	MN					NovaSeq	2021-09-21	unknown
Sample 1895	+	AY.3	26.1791	S	21A (Delta)	0.052783	1078.72	MN					NextSeq	2021-09-21	unknown
Sample 1896	+	B.1.1.7	18.5225	S	20I/501Y.V1	0.018438	903.44	MN	60	M	WHITE	NON HISPANIC OR LATINO	NextSeq	2021-05-21	no
Sample 1897	+	B.1.1.7	23.8678	S	20I/501Y.V1	0.0277406	987.08	MN	12	M	OTHER	NON HISPANIC OR LATINO	NextSeq	2021-05-21	no
Sample 1898	+	AY.4	23.3705	S	21A (Delta)	0.019806	1167.23	MN					NextSeq	2021-08-21	unknown
Sample 1899	+	B.1.1.7	20.5599	S	20I/501Y.V1	0.00150582	1484.49	MN	32	M	WHITE	NON HISPANIC OR LATINO	NextSeq	2021-04-21	no
Sample 1900	+	B.1.1.7	22.6597	S	20I/501Y.V1	0.00244278	2516.75	MN	30	M	WHITE	NON HISPANIC OR LATINO	NovaSeq	2021-04-21	no
Sample 1901	+	AY.12	21.9525	S	21A (Delta)	0.0120107	1020.75	CA					NextSeq	2021-08-21	unknown
Sample 1902	+	B.1.617.2	16.748	S	21A (Delta)	0.00257611	1421.77	SC					NextSeq	2021-09-21	unknown
Sample 1903	+	B.1.1.7	22.5825	S	20I/501Y.V1	0.00163967	1124.23	MN	29	F	WHITE	NON HISPANIC OR LATINO	NextSeq	2021-04-21	no
Sample 1904	+	B.1.1.7	19.3949	S	20I/501Y.V1	0.00331314	1299.1	MN	21	M	BLACK	NON HISPANIC OR LATINO	NextSeq	2021-05-21	no
Sample 1905	+	AY.3	23.9471	S	21A (Delta)	0.106725	447.21	MN					NextSeq	2021-10-21	unknown
Sample 1906	+	AY.25	24.938	S	21A (Delta)	0.0122775	2276.11	MD	50	female		Not Hispanic or Latino	NovaSeq	2021-10-21	unknown
Sample 1907	+	B.1.1.7	24.2276	S	20I/501Y.V1	0.0187057	801.36	MN	13	M	BLACK	UNKNOWN	NextSeq	2021-04-21	no
Sample 1908	+	B.1.1.7	12.7666	S	20I/501Y.V1	0.000234239	3213.95	WV	35	M	WHITE	NON HISPANIC OR LATINO	NovaSeq	2021-04-21	no
Sample 1909	+	AY.3	25.2601	S	21A (Delta)	0.0459074	1132.63	MN					NextSeq	2021-10-21	unknown
Sample 1910	+	B.1.617.2	26.273	S	21A (Delta)	0.0685179	472.25	MN					NovaSeq	2021-08-21	unknown
Sample 1911	+	AY.25	14.5764	S	21A (Delta)	0.116293	1048.75	MN					NovaSeq	2021-10-21	unknown
Sample 1912	+	B.1.1.7	18.2291	S	20I/501Y.V1	0.00133851	1733.51	MN	42	F	WHITE	NON HISPANIC OR LATINO	NextSeq	2021-04-21	no
Sample 1913	+	AY.25	23.3768	S	21A (Delta)	0.0392439	689.4	MN					NovaSeq	2021-08-21	unknown
Sample 1914	+	B.1.1.7	25.0082	S	20I/501Y.V1	0.00374782	1704	MN	43	F	ASIAN	UNKNOWN	NovaSeq	2021-04-21	no
Sample 1915	+	B.1.526	22.4087	S	20C	0.00167263	1122.85	NJ	64	F	WHITE	UNKNOWN	NextSeq	2021-04-21	no
Sample 1916	+	B.1.617.2	25.9025	S	21A (Delta)	0.00682503	2165.35	MN					NovaSeq	2021-10-21	unknown
Sample 1917	+	AY.25	20.5597	S	21A (Delta)	0.00558342	2503.7	NM					NovaSeq	2021-09-21	unknown
Sample 1918	+	AY.4	20.4194	S	21A (Delta)	0.0402141	747.85	WY					NextSeq	2021-10-21	unknown
Sample 1919	+	AY.3	16.4303	S	21A (Delta)	0.0153249	1618.36	MN					NextSeq	2021-09-21	unknown
Sample 1920	+	B.1.617.2	19.2442	S	21A (Delta)	0.0117431	1720.66	MN					NextSeq	2021-10-21	unknown
Sample 1921	+	AY.3	17.8106	S	21A (Delta)	0.00702576	1522.66	MN					NextSeq	2021-10-21	unknown
Sample 1922	+	AY.25	14.8872	S	21A (Delta)	0.00254266	1829.26	MN					NextSeq	2021-10-21	unknown
Sample 1923	+	P.1	24.3371	S	20J/501Y.V3	0.0116061	1279.04	MN	19	M	WHITE	NON HISPANIC OR LATINO	NextSeq	2021-04-21	yes
Sample 1924	+	B.1.1.7	23.4659	S	20I/501Y.V1	0.00408245	1232.06	MN	43	M	OTHER	HISPANIC OR LATINO	NextSeq	2021-04-21	no
Sample 1925	+	B.1.429	21.8889	S	20C	0.227586	1056.16	MN	33	F	WHITE	NON HISPANIC OR LATINO	NextSeq	2021-04-21	no
Sample 1926	+	B.1.526	26.0607	S	20C	0.0044501	2300.85	NJ	29	F	NO INFORMATION	NO INFORMATION	NextSeq	2021-04-21	unknown
Sample 1927	+	B.1.1.7	16.3486	S	20I/501Y.V1	0.00247624	1304.63	MN	41	M	ASIAN	NON HISPANIC OR LATINO	NextSeq	2021-05-21	no
Sample 1928	+	AY.4	25.4306	S	21A (Delta)	0.0935095	416.89	MN					NextSeq	2021-10-21	unknown
Sample 1929	-	Sample Not Detected	22.8191	S				MN	41	M	BLACK	NON HISPANIC OR LATINO	NovaSeq	2021-06-21	no
Sample 1930	+	AY.25	17.1546	S	21A (Delta)	0.00224155	3089.35	MN					NovaSeq	2021-10-21	unknown
Sample 1931	+	B.1.617.2	16.6779	S	21A (Delta)	0.0116427	1425.94	MN					NextSeq	2021-10-21	unknown
Sample 1932	+	AY.39	26.8688	S	21A (Delta)	0.0674808	700.4	MN					NovaSeq	2021-10-21	unknown
Sample 1933	+	AY.44	24.5143	S	21A (Delta)	0.156676	462.81						NextSeq	2021-10-21	unknown
Sample 1934	+	B.1.617.2	21.8051	S	21A (Delta)	0.0074332	1626.53	MN					NovaSeq	2021-10-21	unknown
Sample 1935	+	B.1.1.7	25.5096	S	20I/501Y.V1	0.00311203	1269.87	NA		NA	NO INFORMATION	NO INFORMATION	NextSeq	2021-05-21	no
Sample 1936	+	B.1.1.7	26.4215	S	20I (Alpha, V1)	0.0436354	1376.34	FL					NovaSeq	2021-07-21	unknown
Sample 1937	+	AY.3	21.8568	S	21A (Delta)	0.016728	1068.61	MN					NovaSeq	2021-08-21	unknown
Sample 1938	+	B.1.617.2	14.844	S	21A (Delta)	0.011007	1807.2	NM					NextSeq	2021-10-21	unknown
Sample 1939	+	B.1.1.7	20.545	S	20I/501Y.V1	0.39618	358.9	MN	18	F	BLACK	NON HISPANIC OR LATINO	NextSeq	2021-05-21	no
Sample 1940	+	AY.12	29.9409	S	21A (Delta)	0.204486	529.58	NY					NextSeq	2021-09-21	unknown
Sample 1941	+	AY.3	14.8826	S	21A (Delta)	0.00819645	1599.2	MN					NextSeq	2021-09-21	unknown
Sample 1942	+	AY.3	22.6073	S	21A (Delta)	0.019371	1134.88	MN					NextSeq	2021-09-21	unknown
Sample 1943	+	AY.3	20.1327	S	21A (Delta)	0.00883239	1497.64	MN					NextSeq	2021-08-21	unknown
Sample 1944	+	B.1.1.519	18.9974	S	20B	0.0366518	1424.76	MN	17	F	WHITE	UNKNOWN	NextSeq	2021-05-21	no
Sample 1945	+	A	25.0329	S	20A	0.430062	848.13	NJ					NovaSeq	2021-07-21	unknown
Sample 1946	+	B.1.1.7	24.328	S	20I/501Y.V1	0.0285437	610.69	MN	38	F	ASIAN	NON HISPANIC OR LATINO	NextSeq	2021-05-21	no
Sample 1947	+	B.1.1.519	19.8516	S	20B	0.00354479	1449.58	NJ	4	M	WHITE	NON HISPANIC OR LATINO	NextSeq	2021-04-21	no
Sample 1948	+	AY.25	27.4624	S	21A (Delta)	0.133266	365.89	MN					NovaSeq	2021-08-21	unknown
Sample 1949	+	B.1.526	21.7573	S	21F (Iota)	0.00227478	2176.79	MN					NovaSeq	2021-07-21	unknown
Sample 1950	+	B.1.1.7	26.6337	S	20I/501Y.V1	0.0616718	614.14	MN	65	F	WHITE	NON HISPANIC OR LATINO	NextSeq	2021-04-21	no
Sample 1951	+	B.1.1.7	23.7081	S	20I/501Y.V1	0.00348012	1114.26	NA		NA	NO INFORMATION	NO INFORMATION	NextSeq	2021-04-21	no
Sample 1952	+	AY.3	18.8131	S	21A (Delta)	0.0118434	1199.8	NY					NextSeq	2021-08-21	unknown
Sample 1953	-	Sample Not Detected	28.9037	S				MN					NovaSeq	2021-10-21	unknown
Sample 1954	+	B.1.617.2	21.2339	S	21A (Delta)	0.019335	1203.98	NM					NextSeq	2021-10-21	unknown
Sample 1955	+	Could Not Generate	28.5724	S	20I/501Y.V1	0.531181	438.89	MN	22	M	WHITE	DECLINE TO IDENTIFY	NextSeq	2021-05-21	no
Sample 1956	+	Could Not Generate	28.0983	S		0.905113	317.23	NM	29	F	WHITE	HISPANIC OR LATINO	NextSeq	2021-04-21	no
Sample 1957	+	B.1.1.7	22.2314	S	20I/501Y.V1	0.112527	410.16	MN	17	F	OTHER	HISPANIC OR LATINO	NextSeq	2021-05-21	no
Sample 1958	+	AY.26	27.2562	S	21A (Delta)	0.131242	417.14	MN					NextSeq	2021-10-21	unknown
Sample 1959	+	B.1.1.519	26.2681	S	20B	0.00607842	1026.47	MN	23	F	WHITE	DECLINE TO IDENTIFY	NextSeq	2021-04-21	no
Sample 1960	+	AY.25	23.0974	S	21A (Delta)	0.0141519	1035.83	NH					NovaSeq	2021-08-21	unknown
Sample 1961	+	Could Not Generate	27.7137	S	21A (Delta)	0.278029	571.36	OH	22	female	White	Not Hispanic or Latino	NovaSeq	2021-09-21	unknown
Sample 1962	+	B.1.1.7	27.9657	S	20I/501Y.V1	0.0540758	517.26	MN	55	F	WHITE	NON HISPANIC OR LATINO	NextSeq	2021-05-21	no
Sample 1963	+	AY.4	26.8328	S	21A (Delta)	0.0458347	540.4	MN					NextSeq	2021-10-21	unknown
Sample 1964	+	Could Not Generate	29.7571	S	20A	0.664504	180.01	WA					NextSeq	2021-10-21	unknown
Sample 1965	+	B.1.526	20.8762	S	20C	0.00227478	2470.66	MN	22	U	DECLINE TO IDENTIFY	DECLINE TO IDENTIFY	NovaSeq	2021-05-21	no
Sample 1966	+	B.1.617.2	15.0985	S	21A (Delta)	0.0127133	1901.39	MN					NovaSeq	2021-08-21	unknown
Sample 1967	+	B.1.427	18.8119	S	20C	0.000702271	1295.18	MN	62	F	BLACK	NON HISPANIC OR LATINO	NextSeq	2021-04-21	no
Sample 1968	+	B.1.617.2	18.4439	S	21A (Delta)	0.00883239	1920.19	MN					NextSeq	2021-08-21	unknown
Sample 1969	+	B.1.1.7	15.0791	S	20I/501Y.V1	0.00020083	2758.55	MN	24	M	DECLINE TO IDENTIFY	DECLINE TO IDENTIFY	NovaSeq	2021-04-21	no
Sample 1970	+	AY.25	24.4059	S	21A (Delta)	0.048645	655.08	MN					NovaSeq	2021-09-21	unknown
Sample 1971	+	B.1.617.2	17.9328	S	21A (Delta)	0.00297758	2465.16	MN					NovaSeq	2021-10-21	unknown
Sample 1972	+	AY.3	26.9173	S	21A (Delta)	0.0510856	778.38	MN					NovaSeq	2021-09-21	unknown
Sample 1973	+	B.1.617.2	20.7987	S	21A (Delta)	0.0187354	1311.06	MN					NovaSeq	2021-09-21	unknown
Sample 1974	+	B.1.1.7	26.748	S	20I/501Y.V1	0.0721905	895.22	MN	10	F	ASIAN	NON HISPANIC OR LATINO	NextSeq	2021-05-21	no
Sample 1975	+	B.1.617.2	18.9581	S	21A (Delta)	0.00241101	2951.66	ID					NovaSeq	2021-09-21	unknown
Sample 1976	+	AY.4	20.1652	S	21A (Delta)	0.0136166	1069.39	MN					NovaSeq	2021-08-21	unknown
Sample 1977	+	B.1.617.2	19.8732	S	21A (Delta)	0.0111052	1542.58	MN					NextSeq	2021-09-21	unknown
Sample 1978	+	B.1.1.7	22.8324	S	20I/501Y.V1	0.0171664	533.11	MN	64	F	WHITE	NON HISPANIC OR LATINO	NextSeq	2021-04-21	no
Sample 1979	+	B.1.1.7	21.9801	S	20I/501Y.V1	0.0115112	1233.12	MN	6	M	BLACK	UNKNOWN	NextSeq	2021-04-21	no
Sample 1980	+	AY.12	24.4866	S	21A (Delta)	0.0532285	781.25	MN					NextSeq	2021-09-21	unknown
Sample 1981	+	AY.24	16.0355	S	21A (Delta)	0.00260957	1765.66	MN					NextSeq	2021-08-21	unknown
Sample 1982	+	B.1.1.7	25.1709	S	20I/501Y.V1	0.0870031	1109.67	WI	19	F	WHITE	NON HISPANIC OR LATINO	NextSeq	2021-05-21	unknown
Sample 1983	+	B.1.551	29.2973	S	21A (Delta)	0.395438	236.02	MN					NovaSeq	2021-08-21	unknown
Sample 1984	+	B.1.1.7	29.8167	S	20I/501Y.V1	0.290398	702.94	WY	14	F	DECLINE TO IDENTIFY	DECLINE TO IDENTIFY	NextSeq	2021-05-21	no
Sample 1985	+	AY.25	20.9903	S	21A (Delta)	0.19784	1836.13	MN					NovaSeq	2021-09-21	unknown
Sample 1986	+	AY.4	26.7443	S	21A (Delta)	0.0467046	711.44	MN					NextSeq	2021-10-21	unknown
Sample 1987	+	B.1.1.7	21.211	S	20I/501Y.V1	0.0946326	1654.84	MN	11	M	WHITE	NON HISPANIC OR LATINO	NextSeq	2021-05-21	no
Sample 1988	+	B.1.351	11.0819	S	20H/501Y.V2	0.00528746	3330.64	MN	40	M	BLACK	DECLINE TO IDENTIFY	NovaSeq	2021-04-21	no
Sample 1989	+	AY.25	25.1138	S	21A (Delta)	0.00946805	1908.5	NM					NovaSeq	2021-10-21	unknown
Sample 1990	+	P.1	21.5779	S	20J/501Y.V3	0.000735909	2692.45	MN	26	F	OTHER	HISPANIC OR LATINO	NovaSeq	2021-04-21	no
Sample 1991	+	B.1.617.2	25.0187	S	21A (Delta)	0.0580462	457.3	MN					NextSeq	2021-10-21	unknown
Sample 1992	+	B.1.526.2	19.5258	S	20C	0.00157349	1551.52	NA		NA	NO INFORMATION	NO INFORMATION	NextSeq	2021-04-21	unknown
Sample 1993	+	AY.7.1	26.5647	S	21A (Delta)	0.127973	666.93	MN					NextSeq	2021-10-21	unknown
Sample 1994	+	AY.4	25.1995	S	21A (Delta)	0.0303446	768.26	MN					NextSeq	2021-08-21	unknown
Sample 1995	+	AY.4	24.4896	S	21A (Delta)	0.0561726	557.96	MN					NextSeq	2021-10-21	unknown
Sample 1996	+	B.1.1.7	22.2601	S	20I/501Y.V1	0.00261009	1584.06	MN	17	M	WHITE	UNKNOWN	NextSeq	2021-05-21	no
Sample 1997	+	B.1.617.2	15.156	S	21A (Delta)	0.0025092	1702.98	MN					NextSeq	2021-10-21	unknown
Sample 1998	+	AY.15	22.0132	S	21A (Delta)	0.00592171	894.91	MN					NovaSeq	2021-09-21	unknown
Sample 1999	+	AY.39	26.2303	S	21A (Delta)	0.143923	573.67	NM					NextSeq	2021-10-21	unknown
[truncated: 56,678 more rows]
